# Supplementary material for: Why women die after reaching the hospital: a qualitative critical incident analysis of the ‘third delay’ in postconflict northern Uganda
Source: PubMed Central journal article supplement — BMJ Open. 2021 Mar 22;11(3):e042909. doi: 10.1136/bmjopen-2020-042909 (PMC7986759; doi:10.1136/bmjopen-2020-042909), 2021-03-22
Supplement: bmjopen-2020-042909.draft_revisions.pdf [file bmjopen-2020-042909.draft_revisions.pdf]

# BMJ Open

BMJ Open is committed to open peer review. As part of this commitment we make the peer review history of every article we publish publicly available.

When an article is published we post the peer reviewers' comments and the authors' responses online. We also post the versions of the paper that were used during peer review. These are the versions that the peer review comments apply to.

The versions of the paper that follow are the versions that were submitted during the peer review process. They are not the versions of record or the final published versions. They should not be cited or distributed as the published version of this manuscript.

BMJ Open is an open access journal and the full, final, typeset and author-corrected version of record of the manuscript is available on our site with no access controls, subscription charges or pay-per-view fees (<http://bmjopen.bmj.com>).

If you have any questions on BMJ Open's open peer review process please email [info.bmjopen@bmj.com](mailto:info.bmjopen@bmj.com)

# BMJ Open

## Why women die after reaching the hospital: a qualitative critical incident analysis of the “third delay” in post-conflict northern Uganda.

|                               |                                                                                                                                                                                                                                                                                                                                                                                                                                                                                                                                                        |
|-------------------------------|--------------------------------------------------------------------------------------------------------------------------------------------------------------------------------------------------------------------------------------------------------------------------------------------------------------------------------------------------------------------------------------------------------------------------------------------------------------------------------------------------------------------------------------------------------|
| Journal:                      | <i>BMJ Open</i>                                                                                                                                                                                                                                                                                                                                                                                                                                                                                                                                        |
| Manuscript ID                 | bmjopen-2020-042909                                                                                                                                                                                                                                                                                                                                                                                                                                                                                                                                    |
| Article Type:                 | Original research                                                                                                                                                                                                                                                                                                                                                                                                                                                                                                                                      |
| Date Submitted by the Author: | 18-Jul-2020                                                                                                                                                                                                                                                                                                                                                                                                                                                                                                                                            |
| Complete List of Authors:     | Alobo, Gasthony; Lira University, Obstetrics and Gynecology; St. Mary's Hospital Lacor, Obstetrics and Gynecology<br>Bayo, Pontius; Torit State Hospital , Obstetrics and Gynecology<br>Muhereza, Alex; RHITES - North Acholi, Maternal and Newborn Care<br>Nahurira, Violah; Lacor Hospital, Obstetrics and Gynecology<br>Ochola, Emmanuel; Lacor Hospital, Clinical epidemiology and public health<br>Byamugisha , Josaphat; Makerere University, Department of Obstetrics and Gynecology ; Mulago National Referral Hospital, OBSTETRICS GYNECOLOGY |
| Keywords:                     | GYNAECOLOGY, Clinical audit < HEALTH SERVICES ADMINISTRATION & MANAGEMENT, Maternal medicine < OBSTETRICS                                                                                                                                                                                                                                                                                                                                                                                                                                              |
|                               |                                                                                                                                                                                                                                                                                                                                                                                                                                                                                                                                                        |

SCHOLARONE™  
Manuscripts

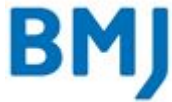

I, the Submitting Author has the right to grant and does grant on behalf of all authors of the Work (as defined in the below author licence), an exclusive licence and/or a non-exclusive licence for contributions from authors who are: i) UK Crown employees; ii) where BMJ has agreed a CC-BY licence shall apply, and/or iii) in accordance with the terms applicable for US Federal Government officers or employees acting as part of their official duties; on a worldwide, perpetual, irrevocable, royalty-free basis to BMJ Publishing Group Ltd ("BMJ") its licensees and where the relevant Journal is co-owned by BMJ to the co-owners of the Journal, to publish the Work in this journal and any other BMJ products and to exploit all rights, as set out in our [licence](#).

The Submitting Author accepts and understands that any supply made under these terms is made by BMJ to the Submitting Author unless you are acting as an employee on behalf of your employer or a postgraduate student of an affiliated institution which is paying any applicable article publishing charge ("APC") for Open Access articles. Where the Submitting Author wishes to make the Work available on an Open Access basis (and intends to pay the relevant APC), the terms of reuse of such Open Access shall be governed by a Creative Commons licence – details of these licences and which [Creative Commons](#) licence will apply to this Work are set out in our licence referred to above.

Other than as permitted in any relevant BMJ Author's Self Archiving Policies, I confirm this Work has not been accepted for publication elsewhere, is not being considered for publication elsewhere and does not duplicate material already published. I confirm all authors consent to publication of this Work and authorise the granting of this licence.

# Why women die after reaching the hospital: a qualitative critical incident analysis of the “third delay” in post-conflict northern Uganda.

## Authors:

Gasthony Alobo<sup>1,2</sup>, Pontius Bayo<sup>3</sup>, Alex Muhereza<sup>4</sup>, Violah Nahurira<sup>1</sup>, Emmanuel Ochola<sup>5</sup>, Josaphat Byamugisha<sup>6</sup>

## Authors' affiliations:

<sup>1</sup>Department of Obstetrics and Gynaecology, Lacor Hospital, Gulu, Uganda.

<sup>2</sup>Department of Obstetrics and Gynaecology, Lira University, Lira, Uganda.

<sup>3</sup>Department of Obstetrics and Gynaecology, Torit State Hospital, Torit, South Sudan.

<sup>4</sup>Department of Maternal and Newborn Care, RHITES-North Acholi, Gulu, Uganda.

<sup>5</sup>Department of Clinical Epidemiology and Public Health, Lacor Hospital, Gulu, Uganda.

<sup>6</sup>Department of Obstetrics and Gynaecology, Makerere University College of Health Sciences, Kampala

## Corresponding author:

Gasthony Alobo, Lira University, BOX 1035, Lira, Uganda; email: [gasthonya@gmail.com](mailto:gasthonya@gmail.com)

**Word count:** 3999

## Abstract

**Objective:** To understand the delays in accessing emergency obstetrics and newborn care (EmONC) after reaching the health facility, and critically explore and describe the pathways that women who require EmONC go through.

**Design:** This was a qualitative study with two units of analysis: (1) Critical Incident Technique (CIT) (2) Key informant (KI) interviews with health workers and patients' attendants.

**Setting:** Thirteen Primary Health Care Centres (PHCCs), one general private-not-for-profit hospital, two Regional Referral Hospitals (RRHs), and one teaching hospital in northern Uganda.

**Participants:** Thirty-eight purposively selected health workers, patients, and attendants participated in KI interviews. CIT mapped pathways for maternal deaths and near-misses selected based on critical case purposive sampling.

**Results:** After reaching the health facility, a pregnant woman goes through a complex pathway that leads to delays to receive appropriate EmONC due to a shortage of medicines and supplies, lack of blood, gaps in staff coverage and skills, and barriers in the referral system. Shortage of medicines and supplies was central in most of the pathways characterised by three patterns: delay to treat, back-and-forth movements to buy medicines or supplies, and multiple referrals across non-functional facilities; increasing the likelihood of dying. Women who sought care from facilities with emergency medicines, functional operating theatres and staff with the practical capacity to identify and treat obstetric emergencies were likely to survive.

**Conclusion:** Our findings show that the pathway to appropriate EmONC is very complex and take too long even after making early contact with the health facility. The third delay, therefore, is indicative of gaps in a facility's emergency readiness. Consequently, to improve maternal and newborn outcomes interventions need to focus on addressing the third delay.

**Keywords:** Maternal deaths, Maternal near-misses, Third delay, EmONC, Critical Incident Technique, Northern Uganda.

## Article summary

### Strengths and limitations of this study:

- This qualitative study utilized an embedded case study design with two methods of data collection for diagrammatic and thematic analyses: Critical Incident Technique (CIT); and Key informant (KI) interviews.
- CIT comprehensively mapped pathways typically followed by cases of maternal deaths and near-misses in similar settings based on critical case purposive sampling.
- This mapping helped to identify key events like decisions and decision-makers, transport means, points of referrals, and timeframes of these critical cases.
- There were limitations to this study; for example, we conducted all the interviews within the health facilities which might have some influence on the responses.
- Also, in some cases, the absence of referral forms or any other documentation made us rely entirely on the information given by the attendants to construct the pathways.

**Background:**

Globally, about 300,000 women die due to complications related to pregnancy and childbirth every year [1]. The global Maternal Mortality Ratio (MMR) is estimated at 210/100,000 live births [2]. Comparably, the MMR reported for low resource settings such as sub-Saharan Africa is 500 per 100,000 live births while in the developed countries, the rates are 16 per 100,000 live births [3]. Almost all maternal deaths (99%) occur in low and middle-income countries (LMICs) [4]. More than half of these deaths occur in Sub-Saharan Africa (SSA), and about a third in South Asia [5, 6]. These are fragile, humanitarian, and post-conflict areas [7].

In Uganda, there has been a small decline in MMR between 2011 and 2016 from 438 to 336 [8, 9]. However, there are regional differences in the MMR. For example, the Acholi and Lago areas in the northern region have higher MMRs than other regions because they are post-conflict areas that experienced a two-decade civil war that disrupted the health system [9, 10]. The leading causes of maternal death are direct obstetric causes and include hemorrhage, infection, hypertensive disorders, uterine rupture, and abortion complications [11, 12]. Malaria and HIV/AIDS contribute significantly to the indirect causes of maternal deaths in Uganda [13]. The non-medical determinants of health like social, cultural, geographical, and economic factors all affect the timeliness of receiving emergency obstetric care in Uganda at both the community and health facility levels. These factors are the major delays that often lead to maternal deaths in Uganda despite improvement in ANC attendance and facility delivery under skilled attendance [9].

To put this into context, the “three delay” model has been widely used to understand the factors that underlie maternal deaths [14]. The first delay is a delay in deciding to seek clinical care during an obstetric emergency, the second delay is a delay in reaching the health facility, and the third delay is a delay in receiving appropriate care while at the health facility. According to this model, the delays exist across all levels of the healthcare system. However, the third delay has been under-documented and under-researched with no in-depth and critical analysis of the pathways that women with obstetric complications follow [15, 16]. Moreover, the met need for emergency obstetrics and newborn care (EmONC) in some post-conflict regions, and LMICs is still very low [17-20]. In the context of Uganda, being a low-income country and a post-conflict setting in some parts, it is possible to hypothesize that there are significant delays in receiving EmONC while at the health facilities with its potentially bad maternal and newborn outcomes. Therefore, the purpose of this

1  
2  
3 study was to (1) understand the delays in accessing EmONC after reaching the health facility; (2)  
4 explore and describe the pathways that women who require CEmONC go through after seeking care  
5 at the BEmONC facilities.  
6  
7

## 8 **Methods:**

### 9 **Study design**

10  
11  
12  
13  
14 This qualitative study utilized an embedded case study design with two units of analysis: (1) Critical  
15 Incident analysis of maternal deaths and maternal near misses, (2) Key informant (KI) interviews  
16 with health workers and patients' attendants. The critical incident technique (CIT) was first  
17 described by Flanagan in 1954 as a way of collecting specific and significant behavioral facts thus  
18 giving a solid basis for making inferences [21]. It has been used as a qualitative methodology in  
19 health systems research, that is useful for exploring barriers to quality care or to achieving  
20 satisfaction with care provision [22]. It involves the analysis of specific incidents to determine what  
21 actions or behaviors could '*lead to the best possible outcome of a given situation*' [23].  
22  
23  
24  
25  
26  
27

### 28 **Study setting and population**

29  
30  
31 The initial interviews and mapping of the pathways for cases of maternal death (MD) and maternal  
32 near-miss (MNM) were carried out between November 2017 and December 2019 in northern  
33 Uganda to explore the pathway to care for mothers accessing EmONC services through the referral  
34 system to Lacor hospital. The hospital is located in Gulu district in the post-conflict Acholi area,  
35 west of northern Uganda. It provides CEmONC services and also serves as a referral site for the  
36 greater northern Uganda. It also has three satellite health centre (H/C) IIIs - Pabbo, Opit, and Amuru  
37 that offer BEmONC services. A second survey was carried out at the end of June 2020 at Lira  
38 Regional Referral Hospital (LRRH) and Lira University Teaching Hospital in the Lango area, east of  
39 northern Uganda. The second survey aimed to increase the number of participants to get saturation.  
40  
41 The population for our embedded case studies used in the CIT included: (a) patients' relatives and  
42 attendants, midwives, doctors, and ambulance drivers that participated in the management of the MD  
43 and MNM; and (b) KI views of purposively selected 9 midwives, 5 doctors, 3 ambulance drivers, 17  
44 attendants and relatives of the MD cases, and 15 cases of MNM.  
45  
46  
47  
48  
49  
50  
51  
52  
53  
54  
55  
56  
57  
58  
59  
60



### Sampling:

Purposive sampling was utilized to (a) select KIs with knowledge of the critical incidents. These were relatives of the patients and healthcare workers who managed the cases (b) healthcare providers and ambulance drivers involved in the referral system (c) MNM cases after recovery and just before discharge. We restricted ourselves to cases of MD and MNM as critical incidents. We used a critical case purposive sampling to identify the cases. Critical case sampling has been described as “a method where selected important or critical cases are examined based on the following: ‘If it happens there, will it happen anywhere?’ or ‘if that group is having problems, then can we be sure all the groups are having problems?’” [24].

### Data collection

We conducted interviews after an initial process of informed consent which was in some cases verbal. The interviews for the critical incidents were conducted by EO and GA from November 2017 to December 2019 and were limited to cases that happened within 2 weeks to eliminate recall bias. GA and AM carried out the additional mapping of pathways for cases and KI interviews at the two tertiary hospitals in the Lango area. The interviews were scheduled at a time agreed upon with each interviewee, and all took place at the hospitals to avoid a potential loss to follow-up and recall bias. The maternal and perinatal death surveillance and response teams of the hospitals identified all the cases. Cases were MDs and MNMs that met the criteria for critical case purposive sampling and only those with complete records were presented in this study. To ensure the transferability of the findings, we considered cases that went through the referral system in more than two facilities, each with its unique delay.

### Data analysis

All the interviews were audio-recorded, transcribed, and translated into English. The transcripts were read completely to identify the major themes and familiarise the researcher with the content. The pathways to care were mapped for each case from onset of labour pains or danger signs to discharge whether alive or dead, with a major focus on the time while at the health facilities. This mapping helped to identify key events like decisions and decision-makers, transport means, points of referrals, timeframes, and geographical locations of these critical cases. A critical incident report was then developed followed by mapping of the pathway for each case by GA and EO. To add on to its rigor,

1  
2  
3 this pathway-analysis was also looked at by other members of the team. We completed the mapping  
4 of the incident cases by hand and Excel shapes once the team members agreed on its accuracy. A  
5 thematic inductive analysis was used for the KI interviews. The themes were determined by the  
6 available data. We did not use an already existing coding frame.  
7  
8  
9

### 10 **Patient and Public Involvement:**

11  
12  
13 The concept and design of this research were informed by experiences shared by patients and care-  
14 takers during routine care for childbirth. We intend to share the results with the stakeholders after  
15 publishing.  
16  
17

### 18 **Ethical consideration**

19  
20  
21 This study was approved by the Lacor Hospital Institutional Research Ethics Committee (LHIREC),  
22 within the Mother and Child Health in Lacor and South Sudan (MoChHeLaSS) project. The  
23 interviewers took into consideration the sensitive issues that surround deaths in most cultures of  
24 Uganda. The purpose of this research was well explained to the family members after building  
25 rapport. Whenever the interviewees showed any sign of emotional distress, the interviews would be  
26 adjourned.  
27  
28  
29  
30  
31

### 32 **Results:**

33  
34  
35 After analysing the pathways from the CIT and data from the KI interviews, we found that a pregnant  
36 woman goes through a complex pathway that leads to delays to receive appropriate care while at the  
37 health facility. Underlying these delays were a shortage of medicines and supplies, lack of blood, gaps  
38 in staff coverage and skills in managing obstetric emergencies, and barriers in the referral system as  
39 summarised in Fig.1. The CIT elucidated similar pathways of maternal mortality in all the selected  
40 areas of northern Uganda. Shortage of medicines and supplies was central in all the pathways  
41 characterised by three patterns: delay to treat, back-and-forth movements to buy medicines or supplies,  
42 and referral across multiple non-functional facilities. Some women by-passed non-functional health  
43 facilities or sought care from traditional birth attendants (TBAs) and religious leaders other than the  
44 formal healthcare system.  
45  
46  
47  
48  
49  
50  
51  
52  
53  
54  
55  
56  
57  
58  
59  
60

### Shortage of medicines and supplies:

The public facilities get medicines and supplies from the National Medical Store (NMS). The medicines and supplies are delivered to the facilities on a fixed schedule. A midwife reported that patients sometimes buy emergency medicines like oxytocin and magnesium sulphate as they wait for the next delivery of medicines. Some KIs cited a severe shortage of supplies like gloves, fluid giving sets, urinary catheters, and intravenous cannulas as some of the reasons for the delay to receive EmONC services. As a result, a lot of time is wasted trying to raise money to buy these supplies. Even those who readily have the money often walk or get transport to distant pharmacies.

*“She was in labour for two days at the health centre. When we reached the regional referral hospital, they told us to buy gloves and a tube for urine. The husband ran home to borrow money. When he came back the doctor told us that the womb had ruptured and that we use that money to go to Lacor Hospital. It’s bad, she died” (mother-in-law of an MD case)*

Lack of antihypertensives and anticonvulsants was a common problem in BEmONC facilities while CEmONC facilities lack anesthetic drugs and spinal needles. For example, Fig. 5 illustrates a delay to receive emergency medications for hypertensive disorders and by-passing facilities with non-functional operating theatres.

Depending on the geographical location, the nearest health facility where a woman in the village could get EmONC is a PHCC health centre (H/C) II or III serviced by a midwife and clinical officer. However, most of the PHCCs in the upcountry regions (northern, eastern, and western) are not fully functional because of frequent stock-outs of EmONC signal function drugs. As a result, the EmONC services are mainly offered by the tertiary level facilities that include the RRHs and NRH.

*“We are now receiving very many referrals from the lower H/Cs due to lack of oxytocin and intravenous fluids. It’s now two months since the drugs were delivered to those facilities, the next delivery is next month” (midwife in-charge, LRRH).*

The health facilities in the urban areas are mainly privately owned and often do not experience stock-outs of medicines, but they too costly for the poor population. The slum-dwellers, who are largely poor, are served by the public RRHs. The typical pathways of MDs and MNMs that we observed for MDs from urban areas are not different from the remote areas, mainly due to lack of tracer medicines and medical supplies.

1  
2  
3 “We often get stock-out of medicines, and you know, we are supplied quarterly. The population we  
4 serve is much bigger than what is budgeted for because of the many slums around the town” (Ward  
5 in-charge, LRRH)  
6  
7

8  
9 “It’s true, sometimes we get bad outcomes of the mother or baby because of drug stock-outs.  
10 Remember these are very poor women from the slums. What would you do if a mother can not buy  
11 medicines from the private pharmacies in times of stock-out and yet she is actively bleeding?”  
12 (Midwife, Lira Regional Referral Hospital)  
13  
14  
15

### 16 **Lack of blood and functionality of the operating theatres:**

17  
18 According to the health system in Uganda, all the H/C IVs and hospitals are supposed to offer  
19 CEmONC. This requires that they have functional operating facilities with the capacity to do  
20 emergency caesarean sections and give blood transfusions. The stakeholders that we interviewed  
21 reported that these facilities are not fully functional in some areas. Some health workers and attendants  
22 reported blood shortage being worse during holidays since students comprise the largest number of  
23 donors. Some patients and attendants reported waiting for blood or being referred to another health  
24 facility during times of blood-scarcity.  
25  
26  
27  
28  
29  
30

31  
32 “We reached at 8.00 pm but had to wait for 4 hours for blood. There was only one unit from the blood  
33 bank, yet they needed four units so that the operation could be done. She was bleeding too much and  
34 died on the way here.” (Husband of an MD case)  
35  
36

37  
38 As illustrated in Figure 7, lack of blood was noted across all levels of facilities including Lacor hospital  
39 and other regional referral hospitals.  
40

41  
42 By design, all the H/C IVs have operating theatres but some are not fully functional. Lack of  
43 anaesthetists, spinal anaesthesia drugs, and needles was cited as reasons for the non-functionality of the  
44 operating theatres as illustrated by a case in Figure 8.  
45  
46

47  
48 “We get so many referrals from H/C IVs for emergency Caesarean section; of course with bad  
49 outcomes quite often. At least for us here patients can buy some drugs from the pharmacies in case of  
50 stock-outs, which is not the case in the villages where the H/C IVs are” (Midwife, Lira University  
51 Teaching Hospital)  
52  
53  
54  
55  
56  
57  
58  
59  
60

### Gaps in staff coverage

Gaps in staff coverage were referred to as a "chronic" problem across all public health facilities. For most of the lower H/Cs, the KIs reported that the only available midwife in each facility is most times away for training and workshops because of the attached monetary incentives. The mothers are sometimes attended by nursing assistants who largely lack midwifery training. Another example given was a gatekeeper who carries out deliveries in one of the BEmONC facilities whenever the midwife is away.

In most CEmONC facilities, the doctors and anesthetists are sometimes not available on weekends and public holidays. We noted during the interviews that most doctors own private facilities near their workplaces. In the afternoon hours and on weekends they retreat to their privately owned facilities. The stakeholders attributed this to lack of supervision by the facility in-charges and the district health officers (DHOs).

*"There is no H/C IV that is fully functional. Well, the structures are there but the personnel are not available full time especially on weekends and at night. For example, doctors. It's not easy to find them full time at work. I was told to wait until Monday... Imagine, I would be dead now" (MNM case)*

In the analysis of the pathways, skilled personnel are critical in executing timely intervention to treat or refer. Fig. 2 illustrates a delay to treat and refer. Some facilities often close their maternity units when the midwives are not available making patients seek alternative care from the TBAs and religious leaders (Figs. 3 and 4)

### Skills of the staff

Skilled birth attendants are necessary for early identification and management of obstetric complications. Many patients and their attendants indicated that midwives take too long to intervene, including referral to a higher facility when needed. Some MNMs reported that they had to demand referrals, but ended up with bad outcomes.

*"Last week I laboured for four days at the health facility. I told the midwife that this is not how my labor has always been [...]. She said that I was pretending and that everything was fine because*

1  
2  
3 *some labours take long like that. I had a sharp pain then started bleeding seriously, she then told us*  
4 *to go to the main hospital. ... my womb was torn already and they removed it. I thank God that I'm*  
5 *still alive.” (MNM case)*  
6  
7  
8  
9

10 During the KI interviews, some stakeholders pointed out training gaps among doctors and midwives.  
11 As a result, the health workers have knowledge gaps and often take long to intervene; causing  
12 unnecessary delays.  
13  
14  
15

16  
17 *“... the midwives and doctors of these days are ‘half baked.’ They are very slow and take long to*  
18 *decide. They can't handle emergencies because you have to act fast” (Ward in-charge, Lacor*  
19 *Hospital).*  
20  
21  
22

23  
24 A critical training gap was reported in some privately-owned midwifery schools that lack teaching  
25 hospitals. A midwife supervisor also cited a lack of internship for certificate and diploma midwives.  
26 Figure 6 illustrates a possible gap in skills where a midwife kept a mother in active labour for three  
27 days.  
28  
29  
30  
31

### 32 **Delays in the referral system**

33

34  
35 There were reports of inter-facility delays due to the unfavourable state of the roads. According to the  
36 ambulance drivers, most roads that link the BEmONC facilities to CEmONC facilities are almost impassible,  
37 especially during rainy seasons. The roads usually flood when it rains heavily. This leads to a delay during the  
38 referral process.  
39  
40  
41

42 *“I've not gone to many places to see how bad the roads are. But when it rains, the roads are*  
43 *impassable. We usually delay so much on the road and if it is a bad emergency, the mother can even*  
44 *lose the baby” (Ambulance driver, Lacor Hospital)*  
45  
46  
47

48  
49 Many midwives were also concerned about delays to access ambulances. They attributed this to the  
50 centralised ambulance system. For the case of Lacor hospital and its satellite H/Cs, the ambulance  
51 system is designed in such a way that they are stationed at the main hospital. In case of any  
52 emergency at the lower H/Cs, the ambulance is called from the main hospital, which is on average  
53  
54  
55  
56  
57  
58  
59  
60

1  
2  
3 70 km away. There is usually some delay owing to the bad roads in the remote areas where these  
4 H/Cs are located.  
5  
6  
7

8 *“For quality and quick response, we are not yet a hundred percent, because you can imagine a*  
9 *mother with cord prolapse is in Amuru, 75 kilometers away, then they discover, they have to call*  
10 *here [Lacor Hospital]. So, there are delays sometimes. Some emergencies don’t need any delay at*  
11 *all.” (Midwife, Lacor Hospital)*  
12  
13  
14  
15

16  
17 The system for government facilities is not any different. The ambulances are stationed at the  
18 regional referral and district hospitals, but they have inadequate fuel most times.  
19  
20  
21

22 *“For us, we have to call the district hospital for the ambulance. But you have to wait until the*  
23 *attendants get money for fuel” (Midwife from H/C III, who escorted a referred mother)*  
24  
25  
26

27 It was reported that some patients are so poor and can spend the whole day trying to raise money for  
28 fuel. In some cases, they have to first go back home and sell land or animals.  
29  
30

31 In one of the pathways, we also noted a back and forth referral pattern. As illustrated in Figure 9,  
32 each facility refers to the other in a zigzagging manner after failing to carry out a diagnostic test or  
33 an operation.  
34  
35  
36

### 37 **Discussion:**

38 Although maternal deaths and near-misses have been largely studied with a major focus on  
39 biological causes of death, this study elucidated some intriguing reasons why mothers die even after  
40 making early contact with formal healthcare. Our findings show that the pathways to getting  
41 appropriate care are very complex and take too long. In the pathways that we analysed, all the  
42 women took much longer while at the health facilities than the common threshold and got  
43 complications. This is consistent with the definition of the duration of the third delay by Edson et al  
44 [25]. The pathways to maternal mortality are highly influenced by a shortage of medicines and  
45 supplies necessary for signal functions of EmONC. Typically, patients and attendants are “shuffled  
46 around” to buy medicines and supplies; causing significant delays. As highlighted in some studies in  
47 the LMICs, we found that most women and their attendants spend time looking for money or where  
48  
49  
50  
51  
52  
53  
54  
55  
56  
57  
58  
59  
60

1  
2  
3 to buy emergency drugs like magnesium sulphate and oxytocin, and parenteral antibiotics [26, 27].  
4 Because most lower facilities lack medicines and supplies, some women had to trek across districts  
5 to access BEmONC services. This is contrary to the WHO recommendation of accessibility within 5  
6 kilometres [28].  
7  
8  
9

10 As illustrated in the various pathways in this study, women who require CEmONC services often  
11 face significant challenges. Similar to most LMICs, lack of blood and blood products, gaps in  
12 coverage by doctors and anaesthetists, and power outages were major hindrances to accessing  
13 emergency operations [29, 30]. Even in cases where emergency caesarean sections were done, it  
14 took longer than the thirty-minute to the one-hour interval of decision to knife-on-skin as stipulated  
15 in some guidelines [31, 32].  
16  
17  
18  
19  
20

21 The pathways described in this study also show that women experience significant “passive delays”  
22 due to limited practical capacity to identify and treat obstetric emergencies even in facilities with a  
23 fair stock of EmONC tracer drugs. Similarly, a study done in Kenya found that availability of signal  
24 functions alone does not directly translate into a readiness to manage obstetric emergencies, but  
25 rather a clinical cascade that involves the ability to identify the emergency, treat it, and monitor-  
26 modify therapy [33]. Women who were first assessed by personnel with suboptimal midwifery skills  
27 like general nurses, nursing assistants, and TBAs were likely to die in most of the pathways. Some  
28 studies have found that these women receive wrong medicines, are not monitored, and often referred  
29 late [34, 35].  
30  
31  
32  
33  
34  
35  
36  
37

38 Evidence from LMICs shows that most BEmONC facilities refer between 60-80% of their patients  
39 to CEmONC facilities [36-38]. A good referral system is therefore very important for good maternal  
40 and neonatal outcomes [39, 40]. From this study, we found delays and disrespectful care in the inter-  
41 facility referral system for mothers who needed CEmONC services. The pathways elucidated four  
42 patterns of delays in the inter-facility referrals: (1) Delay in deciding to refer (2) Referral through  
43 multiple non-functioning CEmONC facilities, (3) Back-and-forth referrals, and (4) By-passing a  
44 non-functional CEmONC facility. These potentially precarious referral patterns were due to gaps in  
45 coverage by a doctor or experienced midwife especially on weekends and public holidays, non-  
46 functional operating theatres, or lack of essential diagnostics like ultrasonography. The major point  
47 of delay in the referral system was the first point of care and often related to the capacity to identify  
48 complications promptly as highlighted in some studies [41, 42].  
49  
50  
51  
52  
53  
54  
55  
56  
57  
58  
59  
60



**Study limitations:**

This study had some limitations that warrant cautious generalisation of the findings. We carried out all the interviews at the health facilities and this may pose response bias. However, we compared responses from respondents along similar pathways to eliminate gross response bias. Secondly, the cases were from health facilities with regional variations that might have influenced the findings. We countered this by using critical case purposive sampling; the findings may not vary so much. Thirdly, in some cases, no reliable documentation made us rely entirely on the information given by the attendants to construct the pathways. This might have some errors in estimating the time intervals and critical decisions. Overall, the concept and understanding used in this study are transferable.

**Conclusion:**

From this study, it is clear that a pregnant woman goes through a complex and precarious pathway to receive EmONC services even after reaching the health facility. This study elucidated three pathways to maternal death as a result of the third delay: delay to treat, back-and-forth referrals to buy medicines, and multiple referrals across non-functional health facilities mainly due to the shortage of medicines and medical supplies, gaps in staff coverage and skills, and delays in the inter-facility referral. These pathways provide a novel framework to assess, track, and improve the health facility's practical readiness to identify and treat obstetric emergencies. The pathways also provide a qualitative, critical approach to clearly describe the third delay. Therefore, to improve maternal and newborn outcomes interventions need to focus on addressing the third delay focusing on gaps along the pathways.

**Availability of data and materials:**

The materials presented here can be got from the corresponding author upon reasonable request.

**Conflict of interest:**

The authors declare no conflict of interest.

**Funding:**

This research received no specific grant from any funding agency in the public, commercial or not-for-profit sectors.

## Acknowledgements:

We are grateful to the patients and all the key-informants for accepting to be interviewed. Special thanks go to MoChELaSS project for training the study team on research methods. We thank Okot Solomon Nono for editing images to meet the standards.

## Author contributions:

GA, AM, and EO conceived the idea and wrote the design. VN and GA collected data. GA and EO carried out data analysis and writing the manuscript. PB and JB did the overall review and editing.

## References:

1. Alkema, L., et al., *Global, regional, and national levels and trends in maternal mortality between 1990 and 2015, with scenario-based projections to 2030: a systematic analysis by the UN Maternal Mortality Estimation Inter-Agency Group*. The Lancet, 2016. **387**(10017): p. 462-474.
2. Oliveira, F.C., et al., *Severe maternal morbidity and maternal near miss in the extremes of reproductive age: results from a national cross-sectional multicenter study*. BMC pregnancy and childbirth, 2014. **14**(1): p. 77.
3. Ki-Moon, B., *The millennium development goals report 2013*. United Nations Pubns, 2013.
4. Information, U.N.D.o.P., *Millennium Development Goals Report 2009 (Includes the 2009 Progress Chart)*. 2009: United Nations Publications.
5. Hill, K., et al., *Estimates of maternal mortality worldwide between 1990 and 2005: an assessment of available data*. The Lancet, 2007. **370**(9595): p. 1311-1319.
6. Lozano, R., et al., *Global and regional mortality from 235 causes of death for 20 age groups in 1990 and 2010: a systematic analysis for the Global Burden of Disease Study 2010*. The lancet, 2012. **380**(9859): p. 2095-2128.
7. Murray, C.J., et al., *Armed conflict as a public health problem*. BMJ, 2002. **324**(7333): p. 346-349.
8. UDHS, I., *Uganda demographic and health survey*. Uganda Bureau of Statistics, Kampala Uganda, 2011.
9. Uganda Bureau of Statistcs (UBOS) and ICF, *Uganda Demographic and Health Survey 2016: Key Indicators Report*. 2017, UBOS and Rockville: Kampala, Uganda and Maryland, USA.
10. Finnström, S., *Living with bad surroundings: War, history, and everyday moments in northern Uganda*. 2008: Duke University Press.
11. Ngonzi, J., et al., *Puerperal sepsis, the leading cause of maternal deaths at a Tertiary University Teaching Hospital in Uganda*. BMC pregnancy and childbirth, 2016. **16**(1): p. 207.
12. Mukasa, P.K., et al., *Uterine rupture in a teaching hospital in Mbarara, western Uganda, unmatched case-control study*. Reproductive health, 2013. **10**(1): p. 29.
13. Zaba, B., et al., *HIV and mortality of mothers and children: evidence from cohort studies in Uganda, Tanzania, and Malawi*. Epidemiology, 2005: p. 275-280.
14. Thaddeus, S. and D. Maine, *Too far to walk: maternal mortality in context*. Social science & medicine, 1994. **38**(8): p. 1091-1110.
15. Goodman, D.M., et al., *The third delay: understanding waiting time for obstetric referrals at a large regional hospital in Ghana*. BMC pregnancy and childbirth, 2017. **17**(1): p. 216.

16. Knight, H.E., A. Self, and S.H. Kennedy, *Why are women dying when they reach hospital on time? A systematic review of the 'third delay'*. PloS one, 2013. **8**(5).
17. Bayo, P., et al., *Estimating the met need for emergency obstetric care (EmOC) services in three payams of Torit County, South Sudan: a facility-based, retrospective cross-sectional study*. BMJ Open, 2018. **8**(2): p. e018739.
18. Holmer, H., et al., *The global met need for emergency obstetric care: a systematic review*. BJOG: An International Journal of Obstetrics & Gynaecology, 2015. **122**(2): p. 183-189.
19. Admasu, K., A. Haile-Mariam, and P. Bailey, *Indicators for availability, utilization, and quality of emergency obstetric care in Ethiopia, 2008*. International Journal of Gynecology & Obstetrics, 2011. **115**(1): p. 101-105.
20. Ameh, C., et al., *Status of emergency obstetric care in six developing countries five years before the MDG targets for maternal and newborn health*. PloS one, 2012. **7**(12).
21. Flanagan, J.C., *The critical incident technique*. Psychological Bulletin, 1954. **51**(4): p. 327.
22. Viergever, R.F., *The critical incident technique: method or methodology?* Qualitative health research, 2019. **29**(7): p. 1065-1079.
23. Kempainen, J.K., *The critical incident technique and nursing care quality research*. Journal of advanced nursing, 2000. **32**(5): p. 1264-1271.
24. Etikan, I., S.A. Musa, and R.S. Alkassim, *Comparison of convenience sampling and purposive sampling*. American journal of theoretical and applied statistics, 2016. **5**(1): p. 1-4.
25. Edson, W., et al., *Safe motherhood studies-timeliness of in-hospital care for treating obstetric emergencies: results from Benin, Ecuador, Jamaica, and Rwanda*. Washington: United States Agency for International Development, 2006.
26. Mgawadere, F., et al., *Factors associated with maternal mortality in Malawi: application of the three delays model*. BMC pregnancy and childbirth, 2017. **17**(1): p. 219.
27. Pacagnella, R.C., et al., *Delays in receiving obstetric care and poor maternal outcomes: results from a national multicentre cross-sectional study*. BMC pregnancy and childbirth, 2014. **14**(1): p. 159.
28. WHO, U., and UNICEF, *AMDD. Monitoring emergency obstetric care: a handbook*. Geneva: World Health Organization; 2009. 2016.
29. Ackers, L., E. Ioannou, and J. Ackers-Johnson, *The impact of delays on maternal and neonatal outcomes in Ugandan public health facilities: the role of absenteeism*. Health Policy and Planning, 2016. **31**(9): p. 1152-1161.
30. Urassa, E., et al., *Operational factors affecting maternal mortality in Tanzania*. Health policy and planning, 1997. **12**(1): p. 50-57.
31. Excellence, N.I.f.C., *Caesarean Section—NICE clinical guideline 132*. London)(<https://www.nice.org.uk/guidance/cg132> [accessed May 2016]), 2012.
32. Practice, A.C.o.O., *ACOG committee opinion No. 433: optimal goals for anesthesia care in obstetrics*. Obstetric Anesthesia Digest, 2010. **30**(2): p. 78.
33. Cranmer, J.N., et al., *Beyond signal functions in global obstetric care: Using a clinical cascade to measure emergency obstetric readiness*. PloS one, 2018. **13**(2): p. e0184252.
34. Paul, B., B. Mohapatra, and K. Kar, *Maternal deaths in a tertiary health care centre of Odisha: an in-depth study supplemented by verbal autopsy*. Indian journal of community medicine: official publication of Indian Association of Preventive & Social Medicine, 2011. **36**(3): p. 213.
35. Pacagnella, R.C., et al., *The role of delays in severe maternal morbidity and mortality: expanding the conceptual framework*. Reproductive health matters, 2012. **20**(39): p. 155-163.
36. Jahn, A., M. Kowalewski, and S.S. Kimatta, *Obstetric care in southern Tanzania: does it reach those in need?* Tropical Medicine & International Health, 1998. **3**(11): p. 926-932.
37. Nkyekyer, K., *Peripartum referrals to Korle Bu teaching hospital, Ghana—a descriptive study*. Tropical Medicine & International Health, 2000. **5**(11): p. 811-817.

- 1  
2  
3 38. Bailey, P.E., et al., *Referral patterns through the lens of health facility readiness to manage obstetric complications: national facility-based results from Ghana*. *Reproductive health*, 2019. **16**(1): p. 19.  
4  
5 39. Yego, F., et al., *A retrospective analysis of maternal and neonatal mortality at a teaching and referral hospital in Kenya*. *Reproductive health*, 2013. **10**(1): p. 13.  
6  
7 40. Ramaswamy, R., et al., *Transforming maternal and neonatal outcomes in tertiary hospitals in Ghana: an integrated approach for systems change*. *Journal of Obstetrics and Gynaecology Canada*, 2015. **37**(10): p. 905-914.  
8  
9 41. Nuamah, G.B., et al., *Incentives to yield to obstetric referrals in deprived areas of Amansie west district in the Ashanti region, Ghana*. *International journal for equity in health*, 2016. **15**(1): p. 117.  
10  
11 42. Elmusharaf, K., et al., *Patterns and determinants of pathways to reach comprehensive emergency obstetric and neonatal care (CEmONC) in South Sudan: qualitative diagrammatic pathway analysis*. *BMC pregnancy and childbirth*, 2017. **17**(1): p. 278.  
12  
13  
14  
15  
16  
17  
18  
19  
20  
21  
22  
23  
24  
25  
26  
27  
28  
29  
30  
31  
32  
33  
34  
35  
36  
37  
38  
39  
40  
41  
42  
43  
44  
45  
46  
47  
48  
49  
50  
51  
52  
53  
54  
55  
56  
57  
58  
59  
60

1  
2  
3  
4  
5  
6  
7  
8  
9  
10  
11  
12  
13  
14  
15  
16  
17  
18  
19  
20  
21  
22  
23  
24  
25  
26  
27  
28  
29  
30  
31  
32  
33  
34  
35  
36  
37  
38  
39  
40  
41  
42  
43  
44  
45  
46  
47  
48  
49  
50  
51  
52  
53  
54  
55  
56  
57  
58  
59  
60

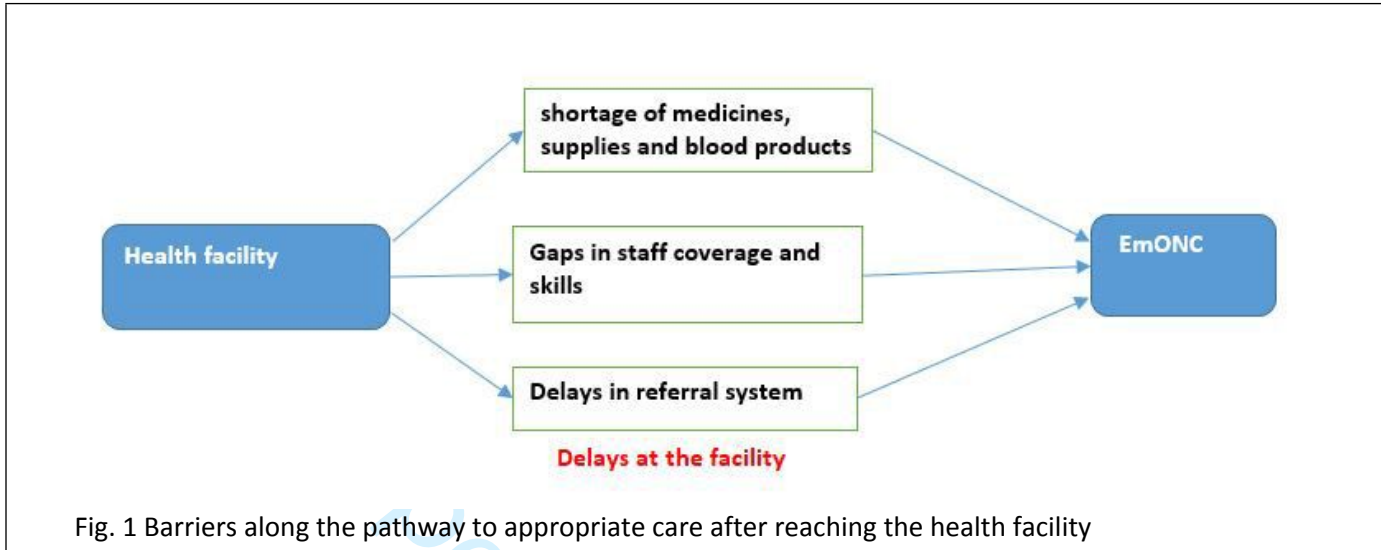

Fig. 1 Barriers along the pathway to appropriate care after reaching the health facility

1  
2  
3  
4  
5  
6  
7  
8  
9  
10  
11  
12  
13  
14  
15  
16  
17  
18  
19  
20  
21  
22  
23  
24  
25  
26  
27  
28  
29  
30  
31  
32  
33  
34  
35  
36  
37  
38  
39  
40  
41  
42  
43  
44  
45  
46  
47  
48  
49  
50  
51  
52  
53  
54  
55  
56  
57  
58  
59  
60

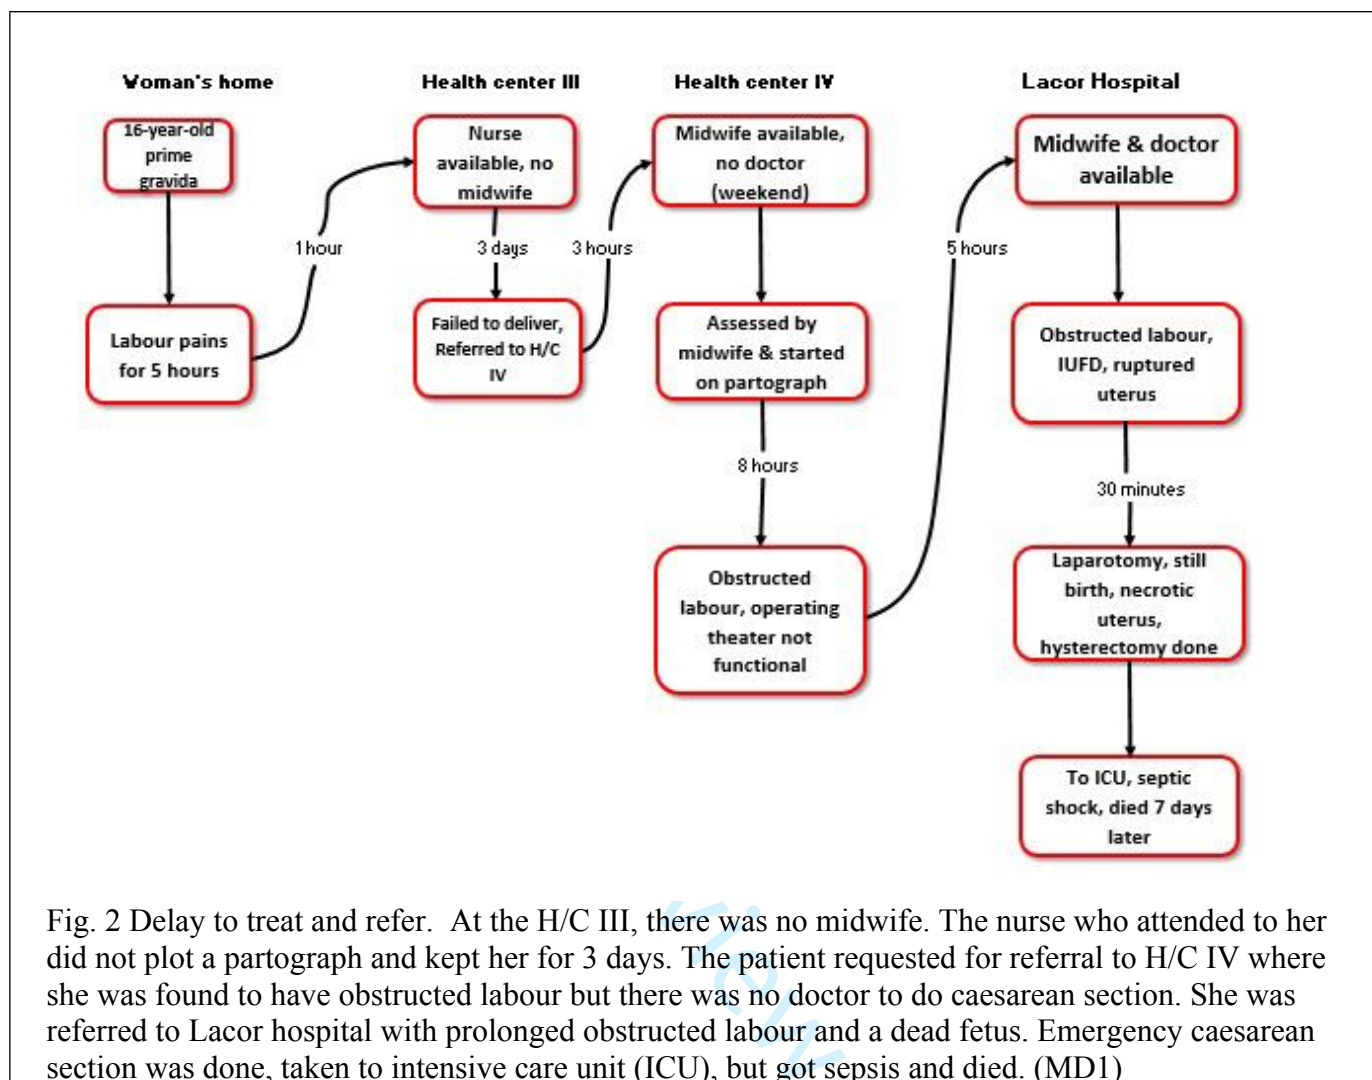

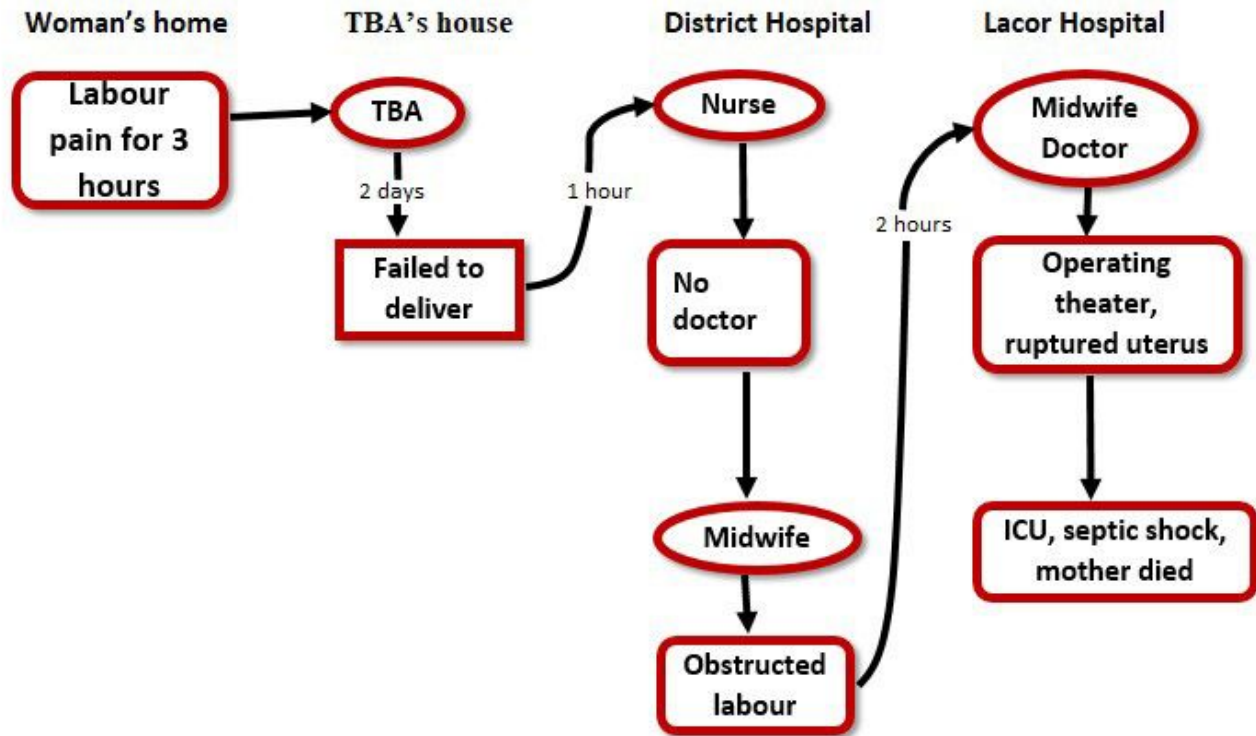

Fig. 3 Delay to treat due to non-functional facility and seeking care from the TBA. She had labour pain for 3 hours then went to the TBA because the nearby H/C III had no midwife. The TBA kept her for two days until she failed to deliver. She was referred to the district hospital but the doctor was not available over the weekend prompting referral to Lacor hospital. She had a ruptured uterus and died of septic shock 4 days after operation. (MD2)

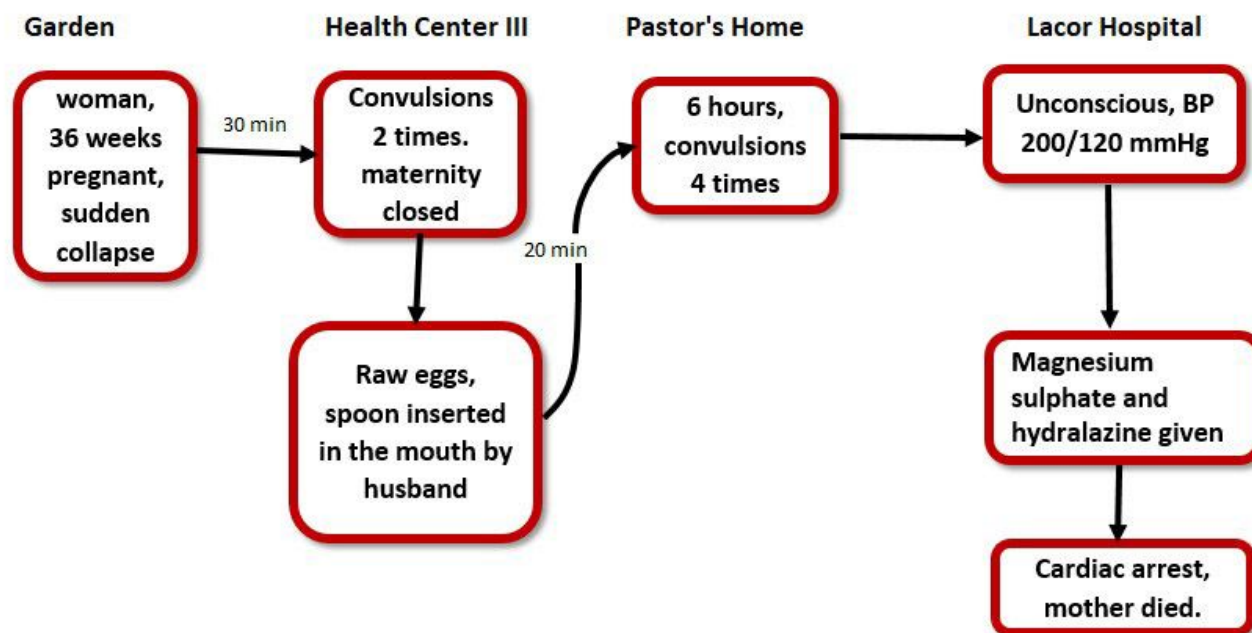

Fig. 4 Non-functional BEmONC facility and seeking care from the religious leader. The woman suddenly collapsed from the garden. She was taken to the H/C III and found the maternity unit closed because there was no midwife. After two episodes of convulsions, the husband gave her raw eggs and inserted a spoon in the mouth to stop her from biting the tongue. The mother-in-law advised that the woman be taken for prayers since the condition might be linked to evil spirits. She spent six hours with the pastor but continued to fit. When she deteriorated, the husband rushed her to Lacor hospital where the blood pressure was found to be very high. She was given treatment but died after 30 minutes due to eclampsia. A peri-mortem operation was done and extracted a live baby. (MD3)



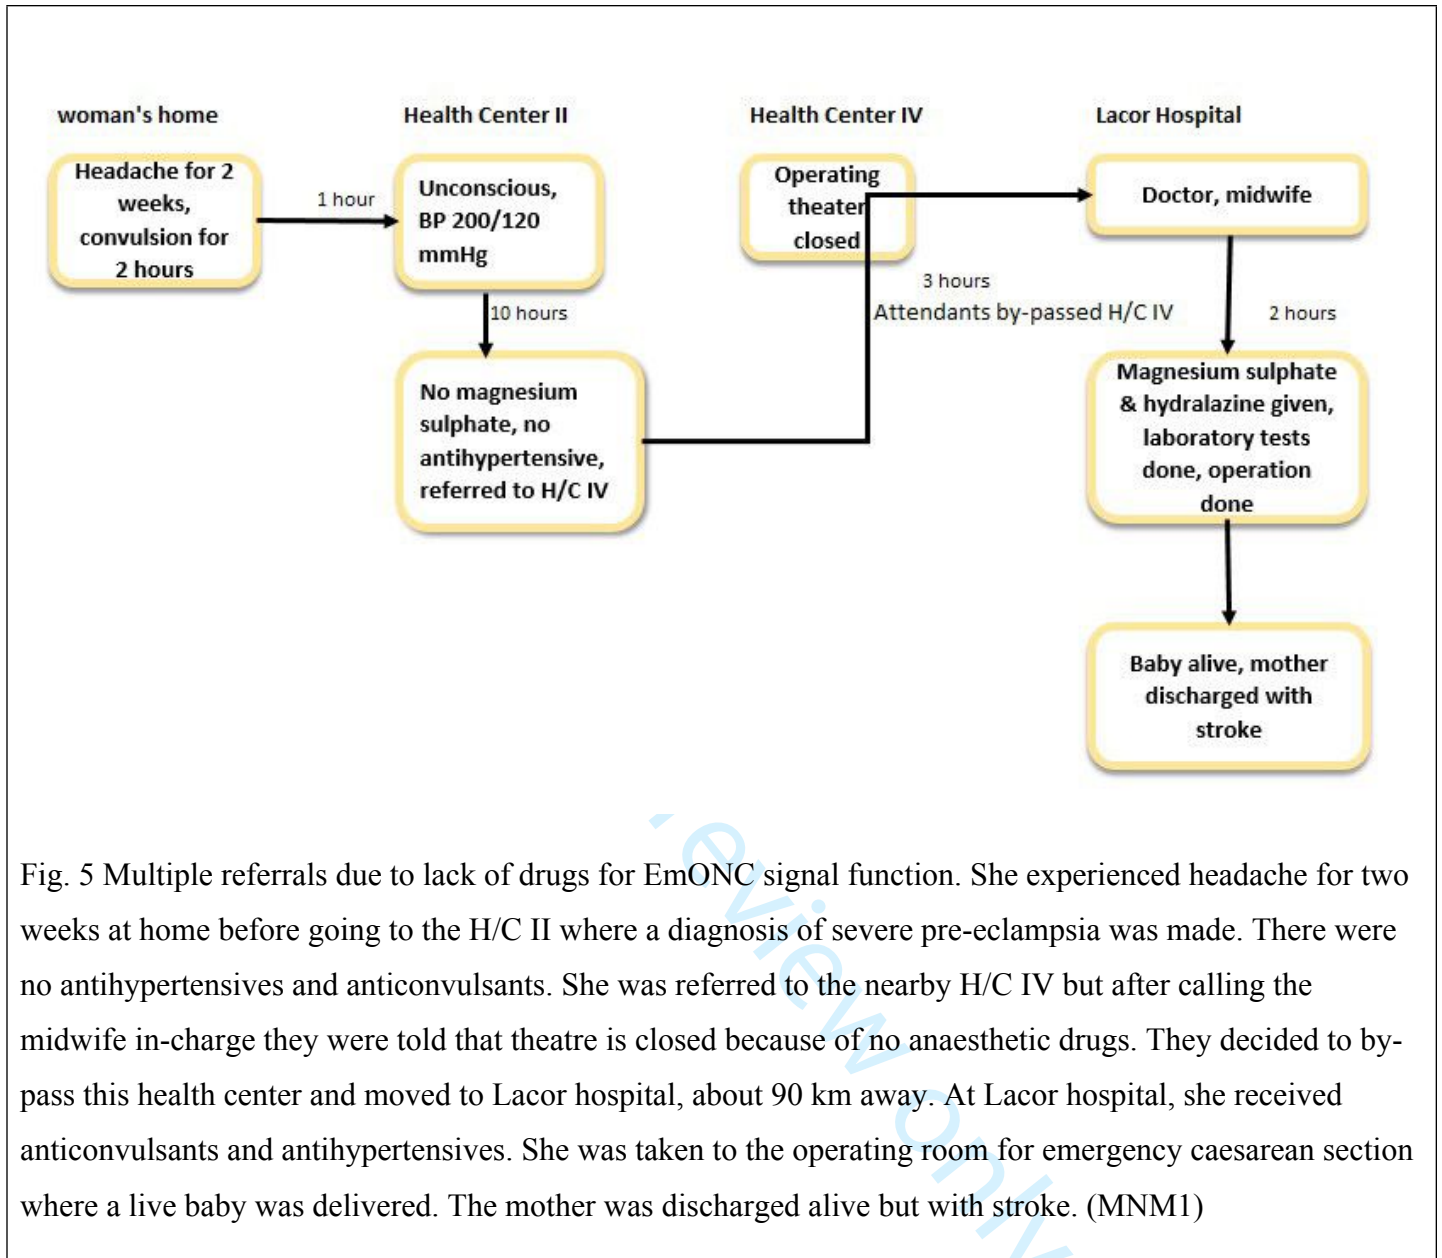

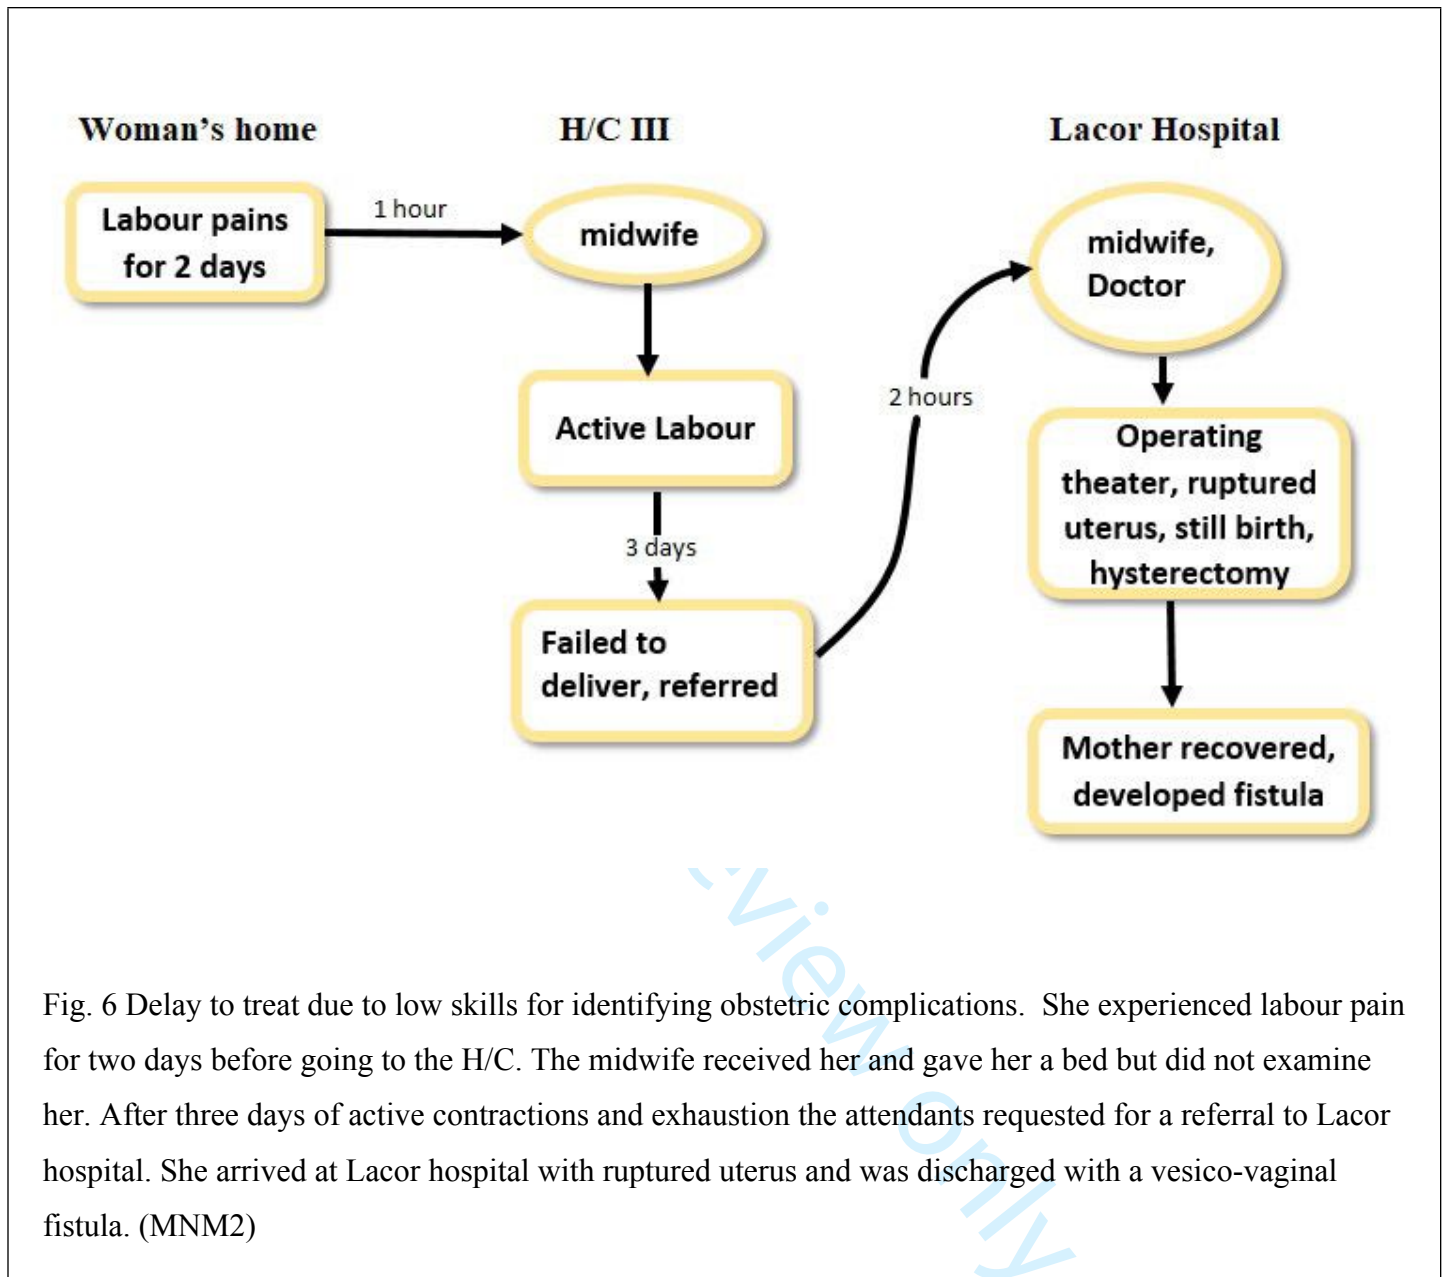

Fig. 6 Delay to treat due to low skills for identifying obstetric complications. She experienced labour pain for two days before going to the H/C. The midwife received her and gave her a bed but did not examine her. After three days of active contractions and exhaustion the attendants requested for a referral to Lacor hospital. She arrived at Lacor hospital with ruptured uterus and was discharged with a vesico-vaginal fistula. (MNM2)

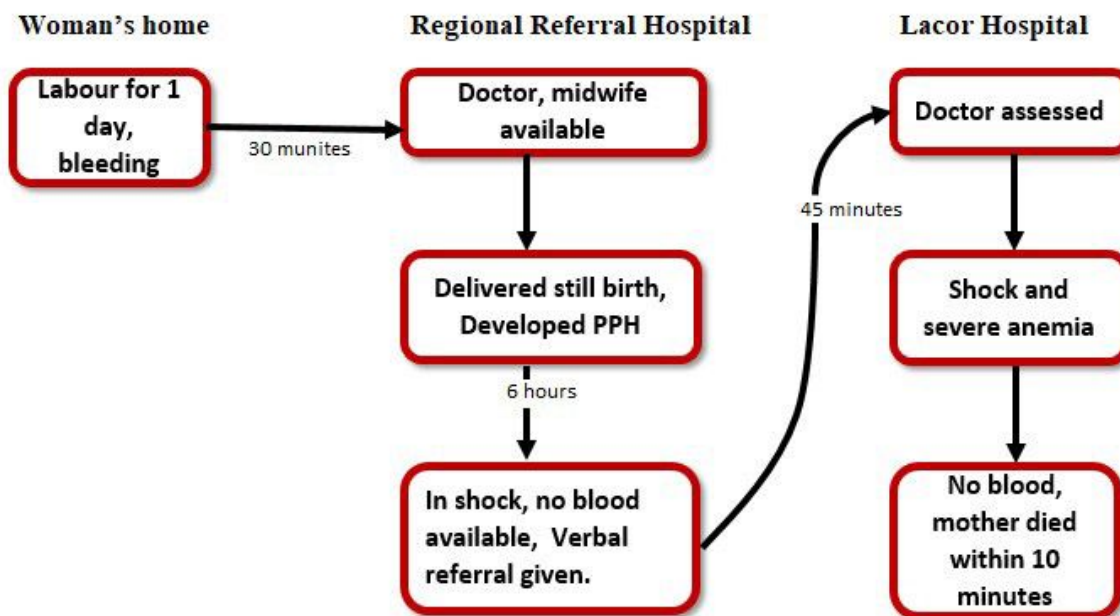

Fig. 7 Lack of blood. She experienced labour pains for one day and bleeding for 4 hours before going to the RRH. She had a fresh still birth and developed post-partum hemorrhage. The doctor requested for three units of blood but there was no blood. She was referred to Lacor Hospital with severe anemia. At Lacor Hospital there was no blood as well; and she died at the admission point. (MD3)

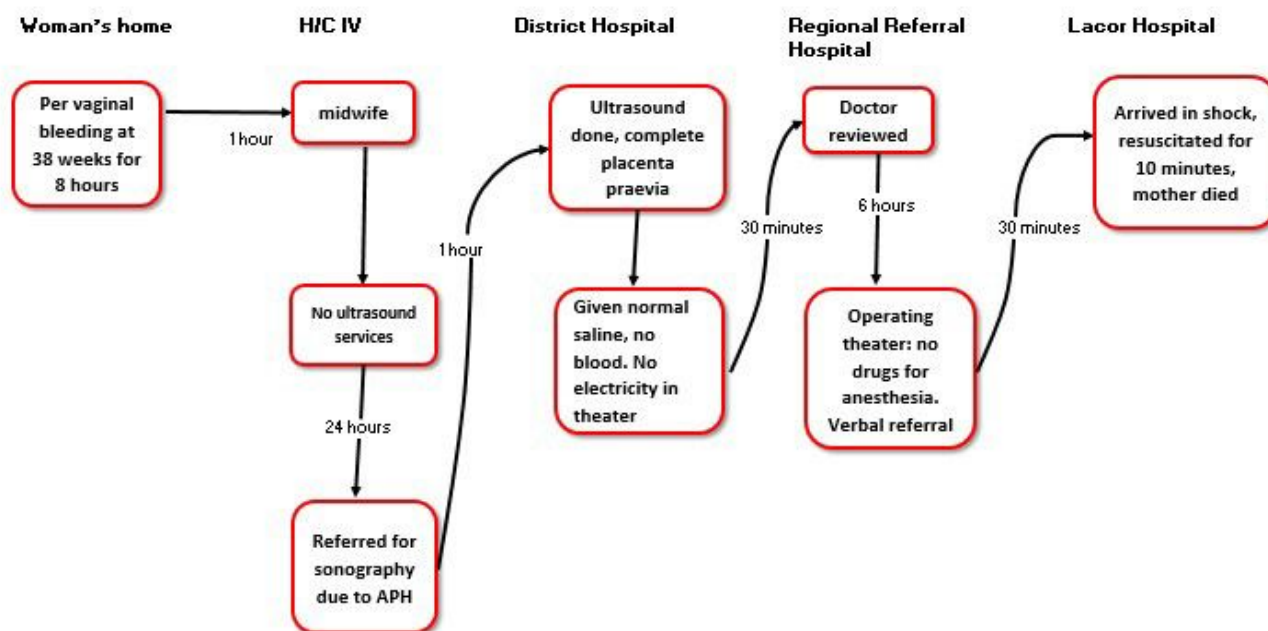

Fig. 8 Multiple referrals across non-functional CEmONC facilities. She had antepartum hemorrhage (APH) and went to a health center IV but the midwife referred her to the District Hospital for ultrasound scan; and it confirmed complete placenta praevia. A decision to do emergency caesarean section was made but the operating did not have electricity prompting referral to the RRH. At the RRH she spent six hours looking for money to buy drugs for anesthesia. After failing to get the money, she was verbally referred to Lacor Hospital but had bled a lot and died of hemorrhagic shock. (MD5)

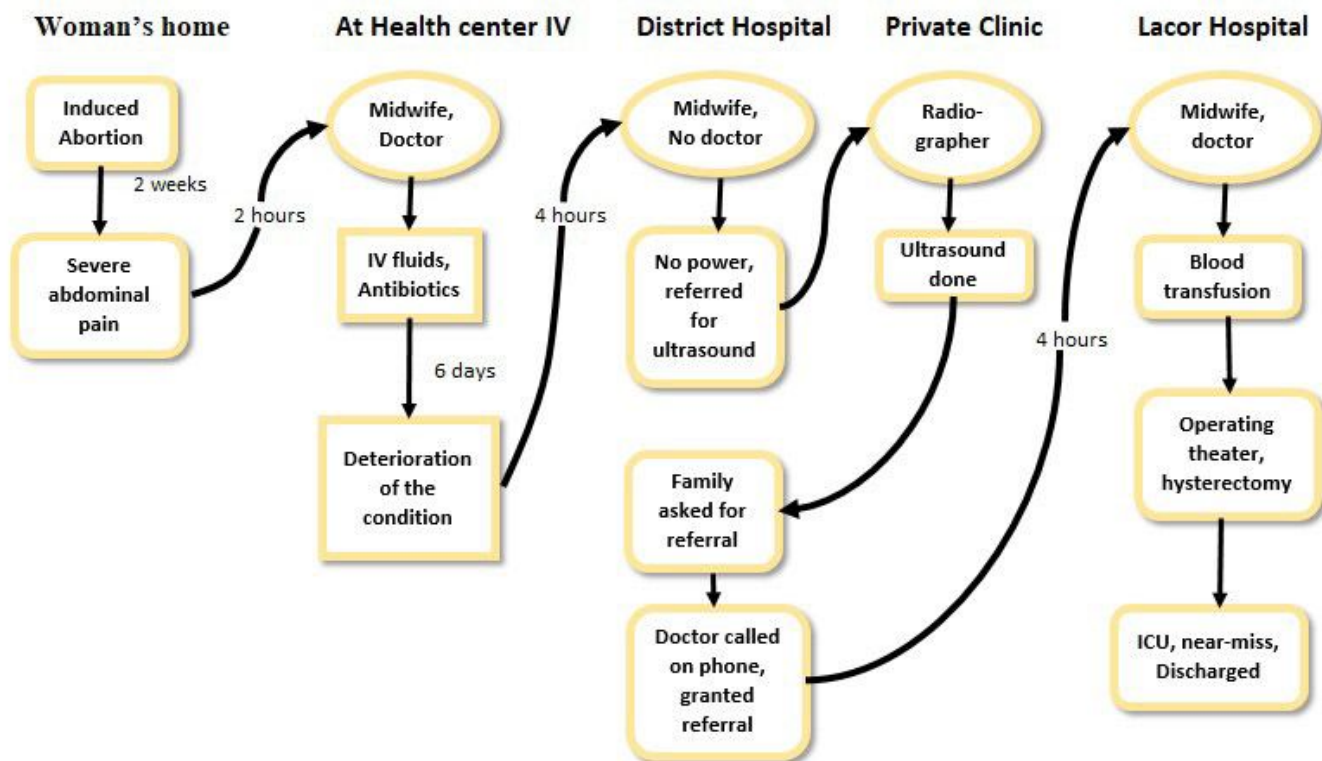

Fig. 9 Back-and-forth referral due to lack of diagnostics. She had unsafe abortion then went to the H/C IV. The doctor reviewed and started her on antibiotics and intravenous fluids. She was referred to the district hospital for abdominal ultrasound scan and complete blood count. Unfortunately, these investigations could not be done. She was again referred to a private medical centre for ultrasound scan that showed massive pyoperitoneum. Operation could not be done because there was no electricity. The family requested for referral to Lacor hospital where operation was done; uterus removed and discharged alive after 5 days. (MNM3)

# Reporting checklist for qualitative study.

Based on the SRQR guidelines.

## Instructions to authors

Complete this checklist by entering the page numbers from your manuscript where readers will find each of the items listed below.

Your article may not currently address all the items on the checklist. Please modify your text to include the missing information. If you are certain that an item does not apply, please write "n/a" and provide a short explanation.

Upload your completed checklist as an extra file when you submit to a journal.

In your methods section, say that you used the SRQR reporting guidelines, and cite them as:

O'Brien BC, Harris IB, Beckman TJ, Reed DA, Cook DA. Standards for reporting qualitative research: a synthesis of recommendations. *Acad Med.* 2014;89(9):1245-1251.

|                              | Reporting Item                                                                                                                                                                                                                                          | Page Number |
|------------------------------|---------------------------------------------------------------------------------------------------------------------------------------------------------------------------------------------------------------------------------------------------------|-------------|
| <b>Title</b>                 |                                                                                                                                                                                                                                                         |             |
|                              | <a href="#">#1</a> Concise description of the nature and topic of the study identifying the study as qualitative or indicating the approach (e.g. ethnography, grounded theory) or data collection methods (e.g. interview, focus group) is recommended | 1           |
| <b>Abstract</b>              |                                                                                                                                                                                                                                                         |             |
|                              | <a href="#">#2</a> Summary of the key elements of the study using the abstract format of the intended publication; typically includes background, purpose, methods, results and conclusions                                                             | 2           |
| <b>Introduction</b>          |                                                                                                                                                                                                                                                         |             |
| Problem formulation          | <a href="#">#3</a> Description and significance of the problem / phenomenon studied: review of relevant theory and empirical work; problem statement                                                                                                    | 4           |
| Purpose or research question | <a href="#">#4</a> Purpose of the study and specific objectives or questions                                                                                                                                                                            | 5           |

## 1 **Methods**

|    |                              |                     |                                                                    |
|----|------------------------------|---------------------|--------------------------------------------------------------------|
| 2  |                              |                     |                                                                    |
| 3  | Qualitative approach and     | <a href="#">#5</a>  | Qualitative approach (e.g. ethnography, grounded theory, case      |
| 4  | research paradigm            |                     | study, phenomenology, narrative research) and guiding theory if    |
| 5  |                              |                     | appropriate; identifying the research paradigm (e.g.               |
| 6  |                              |                     | postpositivist, constructivist / interpretivist) is also           |
| 7  |                              |                     | recommended; rationale. The rationale should briefly discuss       |
| 8  |                              |                     | the justification for choosing that theory, approach, method or    |
| 9  |                              |                     | technique rather than other options available; the assumptions     |
| 10 |                              |                     | and limitations implicit in those choices and how those choices    |
| 11 |                              |                     | influence study conclusions and transferability. As appropriate    |
| 12 |                              |                     | the rationale for several items might be discussed together.       |
| 13 |                              |                     |                                                                    |
| 14 |                              |                     |                                                                    |
| 15 |                              |                     |                                                                    |
| 16 |                              |                     |                                                                    |
| 17 |                              |                     |                                                                    |
| 18 |                              |                     |                                                                    |
| 19 | Researcher characteristics   | <a href="#">#6</a>  | Researchers' characteristics that may influence the research,      |
| 20 | and reflexivity              |                     | including personal attributes, qualifications / experience,        |
| 21 |                              |                     | relationship with participants, assumptions and / or               |
| 22 |                              |                     | presuppositions; potential or actual interaction between           |
| 23 |                              |                     | researchers' characteristics and the research questions, approach, |
| 24 |                              |                     | methods, results and / or transferability                          |
| 25 |                              |                     |                                                                    |
| 26 |                              |                     |                                                                    |
| 27 |                              |                     |                                                                    |
| 28 |                              |                     |                                                                    |
| 29 | Context                      | <a href="#">#7</a>  | Setting / site and salient contextual factors; rationale           |
| 30 |                              |                     |                                                                    |
| 31 | Sampling strategy            | <a href="#">#8</a>  | How and why research participants, documents, or events were       |
| 32 |                              |                     | selected; criteria for deciding when no further sampling was       |
| 33 |                              |                     | necessary (e.g. sampling saturation); rationale                    |
| 34 |                              |                     |                                                                    |
| 35 |                              |                     |                                                                    |
| 36 | Ethical issues pertaining to | <a href="#">#9</a>  | Documentation of approval by an appropriate ethics review          |
| 37 | human subjects               |                     | board and participant consent, or explanation for lack thereof;    |
| 38 |                              |                     | other confidentiality and data security issues                     |
| 39 |                              |                     |                                                                    |
| 40 |                              |                     |                                                                    |
| 41 |                              |                     |                                                                    |
| 42 | Data collection methods      | <a href="#">#10</a> | Types of data collected; details of data collection procedures     |
| 43 |                              |                     | including (as appropriate) start and stop dates of data collection |
| 44 |                              |                     | and analysis, iterative process, triangulation of sources /        |
| 45 |                              |                     | methods, and modification of procedures in response to             |
| 46 |                              |                     | evolving study findings; rationale                                 |
| 47 |                              |                     |                                                                    |
| 48 |                              |                     |                                                                    |
| 49 |                              |                     |                                                                    |
| 50 | Data collection instruments  | <a href="#">#11</a> | Description of instruments (e.g. interview guides,                 |
| 51 | and technologies             |                     | questionnaires) and devices (e.g. audio recorders) used for data   |
| 52 |                              |                     | collection; if / how the instruments(s) changed over the course    |
| 53 |                              |                     | of the study                                                       |
| 54 |                              |                     |                                                                    |
| 55 |                              |                     |                                                                    |
| 56 |                              |                     |                                                                    |
| 57 | Units of study               | <a href="#">#12</a> | Number and relevant characteristics of participants, documents,    |
| 58 |                              |                     | or events included in the study; level of participation (could be  |
| 59 |                              |                     |                                                                    |
| 60 |                              |                     |                                                                    |

reported in results)

|    |                              |                                                                    |       |
|----|------------------------------|--------------------------------------------------------------------|-------|
| 1  |                              |                                                                    |       |
| 2  |                              |                                                                    |       |
| 3  | Data processing              | <a href="#">#13</a>                                                | 6     |
| 4  |                              | Methods for processing data prior to and during analysis,          |       |
| 5  |                              | including transcription, data entry, data management and           |       |
| 6  |                              | security, verification of data integrity, data coding, and         |       |
| 7  |                              | anonymisation / deidentification of excerpts                       |       |
| 8  |                              |                                                                    |       |
| 9  | Data analysis                | <a href="#">#14</a>                                                | 6     |
| 10 |                              | Process by which inferences, themes, etc. were identified and      |       |
| 11 |                              | developed, including the researchers involved in data analysis;    |       |
| 12 |                              | usually references a specific paradigm or approach; rationale      |       |
| 13 |                              |                                                                    |       |
| 14 | Techniques to enhance        | <a href="#">#15</a>                                                | 6     |
| 15 | trustworthiness              | Techniques to enhance trustworthiness and credibility of data      |       |
| 16 |                              | analysis (e.g. member checking, audit trail, triangulation);       |       |
| 17 |                              | rationale                                                          |       |
| 18 |                              |                                                                    |       |
| 19 |                              |                                                                    |       |
| 20 | <b>Results/findings</b>      |                                                                    |       |
| 21 |                              |                                                                    |       |
| 22 | Syntheses and                | <a href="#">#16</a>                                                | 7-8   |
| 23 | interpretation               | Main findings (e.g. interpretations, inferences, and themes);      |       |
| 24 |                              | might include development of a theory or model, or integration     |       |
| 25 |                              | with prior research or theory                                      |       |
| 26 |                              |                                                                    |       |
| 27 | Links to empirical data      | <a href="#">#17</a>                                                | 8-12  |
| 28 |                              | Evidence (e.g. quotes, field notes, text excerpts, photographs) to |       |
| 29 |                              | substantiate analytic findings                                     |       |
| 30 |                              |                                                                    |       |
| 31 | <b>Discussion</b>            |                                                                    |       |
| 32 |                              |                                                                    |       |
| 33 |                              |                                                                    |       |
| 34 | Intergration with prior      | <a href="#">#18</a>                                                | 12-13 |
| 35 | work, implications,          | Short summary of main findings; explanation of how findings        |       |
| 36 | transferability and          | and conclusions connect to, support, elaborate on, or challenge    |       |
| 37 | contribution(s) to the field | conclusions of earlier scholarship; discussion of scope of         |       |
| 38 |                              | application / generalizability; identification of unique           |       |
| 39 |                              | contributions(s) to scholarship in a discipline or field           |       |
| 40 |                              |                                                                    |       |
| 41 |                              |                                                                    |       |
| 42 | Limitations                  | <a href="#">#19</a>                                                | 13    |
| 43 |                              | Trustworthiness and limitations of findings                        |       |
| 44 |                              |                                                                    |       |
| 45 | <b>Other</b>                 |                                                                    |       |
| 46 |                              |                                                                    |       |
| 47 | Conflicts of interest        | <a href="#">#20</a>                                                | 14    |
| 48 |                              | Potential sources of influence of perceived influence on study     |       |
| 49 |                              | conduct and conclusions; how these were managed                    |       |
| 50 |                              |                                                                    |       |
| 51 | Funding                      | <a href="#">#21</a>                                                | 14    |
| 52 |                              | Sources of funding and other support; role of funders in data      |       |
| 53 |                              | collection, interpretation and reporting                           |       |

The SRQR checklist is distributed with permission of Wolters Kluwer © 2014 by the Association of American Medical Colleges. This checklist was completed on 18. July 2020 using <https://www.goodreports.org/>, a tool made by the [EQUATOR Network](#) in collaboration with [Penelope.ai](#)



# BMJ Open

## Why women die after reaching the hospital: a qualitative critical incident analysis of the “third delay” in post-conflict northern Uganda.

|                                 |                                                                                                                                                                                                                                                                                                                                                                                                                                                                                                                                                                                              |
|---------------------------------|----------------------------------------------------------------------------------------------------------------------------------------------------------------------------------------------------------------------------------------------------------------------------------------------------------------------------------------------------------------------------------------------------------------------------------------------------------------------------------------------------------------------------------------------------------------------------------------------|
| Journal:                        | <i>BMJ Open</i>                                                                                                                                                                                                                                                                                                                                                                                                                                                                                                                                                                              |
| Manuscript ID                   | bmjopen-2020-042909.R1                                                                                                                                                                                                                                                                                                                                                                                                                                                                                                                                                                       |
| Article Type:                   | Original research                                                                                                                                                                                                                                                                                                                                                                                                                                                                                                                                                                            |
| Date Submitted by the Author:   | 02-Jan-2021                                                                                                                                                                                                                                                                                                                                                                                                                                                                                                                                                                                  |
| Complete List of Authors:       | Alobo, Gasthony; Lira University, Obstetrics and Gynecology; St. Mary's Hospital Lacor, Obstetrics and Gynecology<br>Ochola, Emmanuel; St. Mary's Hiospital Lacor, Public Health; Gulu University Faculty of Medicine, Public Health<br>Bayo, Pontius; Torit State Hospital , Obstetrics and Gynecology<br>Muhereza, Alex; RHITES - North Acholi, Maternal and Newborn Care<br>Nahurira, Violah; Lacor Hospital, Obstetrics and Gynecology<br>Byamugisha , Josaphat; Makerere University, Department of Obstetrics and Gynecology ; Mulago National Referral Hospital, OBSTETRICS GYNECOLOGY |
| <b>Primary Subject Heading</b>: | Obstetrics and gynaecology                                                                                                                                                                                                                                                                                                                                                                                                                                                                                                                                                                   |
| Secondary Subject Heading:      | Public health, Obstetrics and gynaecology, Qualitative research                                                                                                                                                                                                                                                                                                                                                                                                                                                                                                                              |
| Keywords:                       | GYNAECOLOGY, Maternal medicine < OBSTETRICS, PUBLIC HEALTH                                                                                                                                                                                                                                                                                                                                                                                                                                                                                                                                   |
|                                 |                                                                                                                                                                                                                                                                                                                                                                                                                                                                                                                                                                                              |

SCHOLARONE™  
Manuscripts



I, the Submitting Author has the right to grant and does grant on behalf of all authors of the Work (as defined in the below author licence), an exclusive licence and/or a non-exclusive licence for contributions from authors who are: i) UK Crown employees; ii) where BMJ has agreed a CC-BY licence shall apply, and/or iii) in accordance with the terms applicable for US Federal Government officers or employees acting as part of their official duties; on a worldwide, perpetual, irrevocable, royalty-free basis to BMJ Publishing Group Ltd ("BMJ") its licensees and where the relevant Journal is co-owned by BMJ to the co-owners of the Journal, to publish the Work in this journal and any other BMJ products and to exploit all rights, as set out in our [licence](#).

The Submitting Author accepts and understands that any supply made under these terms is made by BMJ to the Submitting Author unless you are acting as an employee on behalf of your employer or a postgraduate student of an affiliated institution which is paying any applicable article publishing charge ("APC") for Open Access articles. Where the Submitting Author wishes to make the Work available on an Open Access basis (and intends to pay the relevant APC), the terms of reuse of such Open Access shall be governed by a Creative Commons licence – details of these licences and which [Creative Commons](#) licence will apply to this Work are set out in our licence referred to above.

Other than as permitted in any relevant BMJ Author's Self Archiving Policies, I confirm this Work has not been accepted for publication elsewhere, is not being considered for publication elsewhere and does not duplicate material already published. I confirm all authors consent to publication of this Work and authorise the granting of this licence.

# Why women die after reaching the hospital: a qualitative critical incident analysis of the "third delay" in post-conflict northern Uganda.

## Authors:

Gasthony Alobo<sup>1,2</sup>, Emmanuel Ochola<sup>3</sup>, Pontius Bayo<sup>4</sup>, Alex Muhereza<sup>5</sup>, Violah Nahurira<sup>1</sup>, Josaphat Byamugisha<sup>6</sup>

## Authors' affiliations:

<sup>1</sup>Department of Obstetrics and Gynaecology, Lacor Hospital, Gulu, Uganda.

<sup>2</sup>Department of Obstetrics and Gynaecology, Lira University, Lira, Uganda.

<sup>3</sup>Department of Clinical Epidemiology and Public Health, Lacor Hospital, Gulu, Uganda.

<sup>4</sup>Department of Obstetrics and Gynaecology, Torit State Hospital, Torit, South Sudan.

<sup>5</sup>Department of Maternal and Newborn Care, RHITES-North Acholi, Gulu, Uganda.

<sup>6</sup>Department of Obstetrics and Gynaecology, Makerere University College of Health Sciences, Kampala

## Corresponding author:

Gasthony Alobo, Lira University, BOX 1035, Lira, Uganda; email: [gasthonya@gmail.com](mailto:gasthonya@gmail.com)

## Abstract

**Objective:** To understand the delays in accessing emergency obstetrics and newborn care (EmONC) after reaching the health facility, and critically explore and describe the pathways that women who require EmONC go through.

**Design:** This was a qualitative study with two units of analysis: (1) Critical Incident Technique (CIT) (2) Key informant (KI) interviews with health workers, patients, and attendants.

**Setting:** Thirteen Primary Health Care Centres (PHCCs), one general private-not-for-profit hospital, one Regional Referral Hospital (RRH), and one teaching hospital in northern Uganda.

**Participants:** Forty-nine purposively selected health workers, patients, and attendants participated in KI interviews (KII). CIT mapped pathways for maternal deaths and near-misses selected based on critical case purposive sampling.

**Results:** After reaching the health facility, a pregnant woman goes through a complex pathway that leads to delays to receive EmONC. Five reasons were identified for the delays: a shortage of medicines and supplies, lack of blood and functionality of the operating theatres, gaps in staff coverage, gaps in staff skills, and delays in the inter-facility referral system. Shortage of medicines and supplies was central in most of the pathways characterised by three patterns: delay to treat, back-and-forth movements to buy medicines or supplies, and multiple referrals across facilities. Some women also by-passed facilities they deemed to be non-functional.

**Conclusion:** Our findings show that the pathway to EmONC is very precarious and take too long even after making early contact with the health facility. The need to skill and manage better the meagre human resource, and to avail essential medical supplies in health facilities may help to reduce the gaps in a facility's emergency readiness and thus improve maternal and neonatal outcomes.

**Keywords:** Maternal Death, Maternal Near Miss, Third Delay, EmONC, Critical Incident Technique, Northern Uganda.

**Word count: 3987**

## Article summary

### Strengths and limitations of this study:

- This qualitative study utilized two methods of data collection for diagrammatic and thematic analyses, CIT and KII, that are complementary and yield richer data for realist enquiry.
- CIT comprehensively mapped pathways typically followed by cases of maternal deaths and maternal near-misses in similar settings based on critical case purposive sampling.
- There were limitations to this study; for example, we conducted all the interviews within the health facilities which might have some influence on the responses.
- Part of this study focused on the referral system, the addition of two tertiary facilities in Lira without additional step-down health centres might be a limitation to saturation of data and might not fully present the PHCC experience.
- Critical case sampling could be biased by the researchers' selection interests. However, the researchers used independent maternal and perinatal death surveillance and response (MPDSR) teams at the tertiary hospitals to identify the cases based on the principles of analytical generalisation.

## Background:

Globally, maternal mortality is still unacceptably high with about 295,000 women dying every year by 2017 [1]. More than half of the global maternal mortality occurs in Sub-Saharan Africa, and about a third in South Asia [1, 2]. These are fragile, humanitarian, and post-conflict areas [3].

In Uganda, there has been a small decline in MMR between 2011 and 2016 from 438 to 336, but with regional differences due to variations in social determinants of health [4, 5]. For example, northern Uganda is a post-conflict area and host to refugees from South Sudan; these have largely caused food insecurity and constrained resources for health with possible suboptimal maternal healthcare in the region [6, 7]. The leading causes of maternal death are direct obstetric causes and include hemorrhage, infection, hypertensive disorders, uterine rupture, and abortion complications [8, 9]. Malaria and HIV/AIDS contribute significantly to the indirect causes of maternal deaths in Uganda [10].

Several delays also exist along the pathway to care. To put this into context, the “three delay” model has been widely used to understand the factors that underlie maternal deaths [11]. The first delay is a delay in deciding to seek clinical care during an obstetric emergency, the second delay is a delay in reaching the health facility, and the third delay is a delay in receiving appropriate care while at the health facility. With exception of the first and second delays, the third delay has been generally under-documented and under-researched with only a few in-depth and critical analyses of the pathways that women with obstetric complications follow [12, 13]. Moreover, the met need for emergency obstetrics and newborn care (EmONC) in some post-conflict regions, and the Low and Middle Income Countries (LMICs) is still very low [14-17]. In the context of Uganda, being a low-income country, post-conflict and refugee-host setting in some parts, it is possible to hypothesize that there are significant delays in receiving EmONC while at the health facilities with its potentially bad maternal and newborn outcomes. Therefore, the purpose of this study was to (1) understand the delays in accessing EmONC after reaching the health facility; (2) explore and describe the pathways that women who require EmONC go through after deciding to seek care.

## Methods:

### Study design

This qualitative study utilized an embedded study design with two units of analysis: (1) Critical Incident analysis of maternal deaths (MD) and maternal near misses (MNM), (2) KII with persons who were perceived to know about the maternal health care by their roles as health workers or experience with the health system. The critical incident technique (CIT) was first described by Flanagan in 1954 as a way of collecting specific and significant behavioural facts thus giving a solid basis for making inferences [18]. It has been used as a qualitative methodology in health systems research, that is useful for exploring barriers to quality care or to achieving satisfaction with care provision [19]. It involves the analysis of specific incidents to determine what actions or behaviors could '*lead to the best possible outcome of a given situation*' [20]. The use of CIT complements KII by drawing on more specific experiences thereby eliciting richer data for realist enquiry [21].

### Study setting and population

The first part of this study was carried out in northern Uganda to explore the pathway to care for mothers accessing EmONC services through the referral system to Lacor hospital. The hospital is located in Gulu district in the post-conflict Acholi sub-region, west of northern Uganda. It provides comprehensive EmONC (CEmONC) services and also serves as a referral site for the greater northern Uganda. It has three satellite health centre (H/C) IIIs within an average distance of 60 kilometers - Pabbo, Opit, and Amuru that offer basic EmONC (BEmONC) services. The main means of transport is the motorcycle because of poor road networks. A second part of the study was carried out at Lira Regional Referral Hospital and Lira University Teaching Hospital in the Lango sub-region, east of northern Uganda. The addition of these two tertiary facilities aimed to increase the number of participants to get saturation. Northern Uganda has an estimated population of 7.1 million, and a total fertility rate of 5.4 children per woman [5]. The population used in the CIT and KI included: patients' relatives and attendants, facility-based KIs, and the patients themselves for MNM.

## Sampling and participants

### *Key-informants*

We used a purposive sampling technique to identify and recruit the first few KIs who were healthcare workers as well as unit in-charges and attendants with knowledge of the critical incidents or members of the maternal and perinatal death surveillance and response (MPDSR) teams at Lacor hospital, Lira Regional Referral Hospital, and Lira University Teaching Hospital. This was followed by a snowball technique to identify further KIs like ambulance drivers, midwives, patients, and relatives who also participated in the care of the critical incidents. During data collection, we also identified other KIs in the above categories who accepted to participate in this study. A total of forty-nine KIs took part in this study (Table 1).

### *Critical incidents*

We used a critical case purposive sampling to identify the cases. We restricted ourselves to MD and MNM as critical incidents. Critical case sampling has been described as “a method where selected important or critical cases are examined based on the following: ‘If it happens there, will it happen anywhere?’ or ‘if that group is having problems, then can we be sure all the groups are having problems?’” [22]. The MPDSR teams of the hospitals identified a total of fifty cases that had complete records and met the criteria for critical case purposive sampling. To ensure the transferability of the findings, we only included eight MDs and fifteen MNMs that went through the referral system in more than two facilities, except for the Lango sub-region.

Table 1 Key-informants interviewed

| Category          | Acholi sub-region | Lango sub-region | Total |
|-------------------|-------------------|------------------|-------|
| Doctors           | 3                 | 2                | 5     |
| Midwives          | 6                 | 3                | 9     |
| Ambulance drivers | 2                 | 1                | 3     |
| Patients          | 9                 | 6                | 15    |
| Attendants        | 11                | 6                | 17    |



## Data collection

We conducted interviews after an initial process of informed consent from all the participants which was in some cases verbal because the study presented no more than minimal risk or harm. The interviews and mapping of the pathways were conducted from November 2017 to December 2019 in the Acholi sub-region. Additional mapping of pathways for cases and interviews at the two tertiary hospitals in the Lango sub-region were done in June 2020. The interviews were scheduled at a time agreed upon with each interviewee, and all took place at the hospitals and within two weeks of the occurrence of the MD and MNM to avoid a potential loss to follow-up and recall bias. For the CIT, each interview began with self-introduction since some participants were not known to the interviewers followed by the collection of the demographic and family background information. In all the cases, semi-structured interviews were carried out in Luo for the patients and their relatives or attendants and in English for the health workers. For each case, we conducted group or individual interviews, as chosen by the participants. The former case involved one respondent narrating the entire events surrounding a critical incident, followed by a further inquiry or additional contribution from the members. The four guiding questions were: ‘when did she start having labour pain or feeling unwell?’ ‘where did she go to?’ ‘how did she reach there and how long did she take?’ ‘what happened on arrival at the facility?’ However, the interviewers allowed participants to express themselves freely, audio-recorded or took systematic notes, and where possible, sketched a diagrammatic pathway for each case. Additional questions were also asked regarding ANC attendance, risk factors. For the facility in-charges, we asked questions related to quality and accessibility to EmONC services in northern Uganda. Before concluding each interview, the interviewers revisited the diagrammatic pathways to make clarifications and member checking where necessary. All the interviews were concluded by asking the interviewees for recommendations to improve EmONC services with a focus on reducing the third delay then thanking the participants.

## Data analysis

All the interviews were transcribed and translated into English. The transcripts were read through several times to identify the major themes and become familiar with the content. The pathways to care were mapped for each case from onset of labour pains or danger signs to discharge whether alive or dead, with a major focus on the time while at the health facilities. This mapping helped to identify key events like decisions and decision-makers, transport means, points of referrals,

1  
2  
3 timeframes, and geographical locations of these critical cases. A critical incident report that merged  
4 data from CIT and KII was then developed, followed by mapping of the pathway for each case. To  
5 add on to its rigor, this pathway-analysis was also looked at by other members of the team. We  
6 completed the mapping of the incidents by hand and Excel shapes once the team members agreed on  
7 its accuracy. A thematic inductive analysis was used for the KII. We followed the six steps of  
8 thematic analysis: familiarisation, coding, generating themes, reviewing themes, defining and  
9 naming themes, then writing up [23]. NVivo 10 software was used to manage the data.

### 16 **Patient and Public Involvement:**

17  
18 The concept and design of this research were informed by experiences shared by patients and care-  
19 takers during routine care for childbirth. We have shared the results, especially critical incidents,  
20 with the district and national stakeholders.

### 24 **Ethical consideration**

25  
26 This study was approved by the Lacor Hospital Institutional Research Ethics Committee and the  
27 Uganda National Council for Science and Technology, within the Mother and Child Health Lacor  
28 and South Sudan (MoCHeLaSS) project. The interviewers took into consideration the sensitive  
29 issues that surround deaths in most cultures of northern Uganda. Whenever the interviewees showed  
30 any sign of emotional distress, the interviews would be adjourned.

### 36 **Results:**

37  
38 After analysing the pathways from the CIT and data from the KII, we found that a pregnant woman  
39 goes through a complex pathway that leads to delays to receive care while at the health facility  
40 sometimes with sub-optimal outcomes. Underlying these delays were a shortage of medicines and  
41 supplies, lack of blood, gaps in staff coverage and skills in managing obstetric emergencies, and  
42 barriers in the referral system as summarised in Figure 1. The CIT elucidated similar pathways of  
43 maternal mortality in all the selected cases: delay to treat, back-and-forth movements to buy medicines  
44 or supplies, and referral across multiple facilities that were deemed non-functional. Some women  
45 bypassed facilities they perceived to be non-functional or sought care from traditional birth attendants  
46 (TBAs) and religious leaders.

### Shortage of medicines and supplies

A midwife reported that patients sometimes buy emergency medicines like oxytocin and magnesium sulphate as they wait for the next delivery of medicines and supplies from the national medical store. Some KIs cited a severe shortage of supplies like gloves, fluid giving sets, urinary catheters, and intravenous cannulas as some of the reasons for the delay to receive EmONC services. As a result, a lot of time is wasted trying to raise money to buy these supplies.

*“She was in labour for two days at the health centre. When we reached the regional referral hospital, they told us to buy gloves and a tube for urine. The husband ran home to borrow money. When he came back the doctor told us that the womb had ruptured and that we use that money to go to Lacor Hospital. It's bad, she died” (mother-in-law of an MD case, Lacor Hospital)*

Lack of antihypertensives and anticonvulsants was a common problem in BEmONC facilities while CEmONC facilities lack anesthetic drugs and spinal needles. For example, Figure 2 illustrates a delay to receive emergency medications for hypertensive disorders and by-passing facilities with non-functional operating theatres.

Depending on the geographical location, the nearest health facility where a woman in the village could get EmONC is a PHCC health centre (H/C) II or III serviced by a midwife and clinical officer. However, most of the PHCCs in the region are not fully functional because of frequent stock-outs of EmONC signal function drugs. As a result, the EmONC services are mainly offered by the tertiary level facilities that include the RRHs and NRH.

*“We are now receiving very many referrals from the lower H/Cs due to lack of oxytocin and intravenous fluids. It's now two months since the drugs were delivered to those facilities” (midwife in-charge, Lira RRH).*

According to some patients and their relatives, health facilities in the urban areas are mainly privately owned and often do not experience stock-outs of medicines, but they are too costly for the poor population. The slum-dwellers, who are largely poor, are served by the public RRHs. The typical pathways of MDs and MNMs that we observed for MDs from urban areas are not different from the remote areas, mainly due to lack of tracer medicines and medical supplies.

1  
2  
3 *“It’s true, sometimes we get bad outcomes of the mother or baby because of drug stock-outs.*  
4 *Remember these are very poor women from the slums. What do you do if a mother can not buy*  
5 *medicines from the private pharmacies in times of stock-out and yet she is actively bleeding?”*  
6  
7  
8 *(Midwife, Lira RRH)*  
9

### 10 **Lack of blood and functionality of the operating theatres**

11  
12  
13 According to the health system in Uganda, all the H/C IVs and hospitals are supposed to offer  
14 CEmONC. This requires that they have facilities to perform emergency caesarean sections and blood  
15 transfusion. The stakeholders that we interviewed reported that these facilities are not fully functional  
16 in some areas. Some health workers and attendants reported blood shortage being worse during  
17 holidays since students comprise the largest number of donors. Some patients and attendants reported  
18 waiting for blood or being referred to another health facility during times of blood-scarcity.  
19

20  
21  
22 *"We reached at 8.00 pm but had to wait for 4 hours for blood. There was only one unit from the blood*  
23 *bank, yet they needed four units so that the operation could be done. She was bleeding too much and*  
24 *died on the way here." (Husband of an MD case, Lacor Hospital)*  
25  
26  
27  
28

29  
30 As illustrated in Figure 3, lack of blood was noted across all levels of facilities including Lacor hospital  
31 and other tertiary hospitals.  
32

33  
34 By design, all the H/C IVs have operating theatres but some are not fully functional. Lack of  
35 anaesthetists, spinal anaesthesia drugs, and needles was cited as reasons for the non-functionality of the  
36 operating theatres as illustrated by a case in Figure 4.  
37  
38

39  
40 *"We get so many referrals from H/C IVs for emergency Caesarean section; of course with bad*  
41 *outcomes quite often. At least for us here patients can buy some drugs from the pharmacies in case of*  
42 *stock-outs, which is not the case in the villages where the H/C IVs are"* (Midwife, Lira University  
43 *Teaching Hospital)*  
44  
45  
46

### 47 **Gaps in staff coverage**

48  
49 Gaps in staff coverage were referred to as a "chronic" problem across all public health facilities by  
50 most non-facility based KIs. For most of the lower H/Cs, the KIs reported that the only available  
51 midwife in each facility is most times away for training and workshops leaving only nursing  
52 assistants who largely lack midwifery training. In most CEmONC facilities, the doctors and  
53  
54  
55  
56  
57  
58  
59

1  
2  
3 anesthetists are sometimes not available on weekends and public holidays. The stakeholders  
4 attributed this to lack of supervision by the facility in-charges and the district health officers.  
5  
6  
7

8 *"There is no H/C IV that is fully functional. Well, the structures are there but the personnel are not*  
9 *available full time especially on weekends and at night. For example, doctors. It's not easy to find*  
10 *them full time at work. I was told to wait until Monday... Imagine, I would be dead now"* (MNM  
11 *case, Lira RRHI)*  
12  
13  
14  
15

16  
17 In the analysis of the pathways, skilled personnel are critical in executing timely interventions to treat  
18 or refer. Figure 5 illustrates a delay to treat and refer. Some facilities often close their maternity units  
19 when the midwives are not available making patients seek alternative care from the TBAs and religious  
20 leaders (Figure 6 and Figure 7)  
21  
22  
23  
24

### 25 **Skills of the staff**

26

27 Skilled birth attendants are necessary for early identification and management of obstetric  
28 complications as indicated by facility in-charges. Many patients and their attendants reported that  
29 midwives take too long to intervene, including referral to a higher facility when needed. Some  
30 MNMs reported that they had to demand referrals, but ended up with bad outcomes.  
31  
32  
33  
34  
35

36 *"Last week, I laboured for four days at the health facility. I told the midwife that this is not how my*  
37 *labour has always been [...]. She said that I was pretending and that everything was fine because*  
38 *some labours take long like that.... I had a sharp pain then started bleeding seriously, she then told*  
39 *us to go to the main hospital. ... my womb was torn already and they removed it. I thank God that*  
40 *I'm still alive."* (MNM case, Lacor Hospital)  
41  
42  
43  
44  
45

46 During the KI interviews, some stakeholders pointed out training gaps among doctors and midwives.  
47 As a result, the health workers have knowledge and skill gaps and often take long to intervene;  
48 causing unnecessary delays.  
49  
50  
51  
52  
53  
54  
55  
56  
57  
58  
59  
60

1  
2  
3 *“... the midwives and doctors of these days are ‘half baked.’ They are very slow and take long to*  
4 *decide. They can’t handle emergencies because you have to act fast” (Ward in-charge, Lacor*  
5 *Hospital).*  
6  
7  
8  
9

10 A critical training gap was reported in some privately-owned midwifery schools that lack teaching  
11 hospitals. A midwife supervisor also cited a lack of internship for certificate and diploma midwives.  
12 Figure 8 illustrates a possible gap in skills where a midwife kept a mother in active labour for three  
13 days.  
14  
15  
16  
17

### 18 **Delays in the referral system**

19  
20  
21 There were reports of inter-facility delays due to the unfavourable state of the roads. According to the  
22 ambulance drivers, most roads that link the BEmONC facilities to CEmONC facilities are almost impassable,  
23 especially during rainy seasons. The roads usually flood when it rains heavily. This leads to a delay during the  
24 referral process.  
25  
26  
27

28 *“I’ve not gone to many places to see how bad the roads are. But when it rains, the roads are*  
29 *impassable. We usually delay so much on the road and if it is a bad emergency, the mother can even*  
30 *lose the baby” (Ambulance driver, Lacor Hospital)*  
31  
32  
33  
34

35 Many midwives were also concerned about delays to access ambulances. They attributed this to the  
36 centralised ambulance system. For the case of Lacor hospital and its satellite H/Cs, the ambulance  
37 system is designed in such a way that they are stationed at the main hospital. In case of any  
38 emergency at the lower H/Cs, the ambulance is called from the main hospital, which is on average  
39 70 km away. There is usually some delay owing to the bad roads in the remote areas where these  
40 H/Cs are located.  
41  
42  
43  
44  
45  
46

47 *“For quality and quick response, we are not yet a hundred percent, because you can imagine a*  
48 *mother with cord prolapse is in Amuru, 75 kilometers away, then they discover, they have to call*  
49 *here [Lacor Hospital]. So, there are delays sometimes. Some emergencies don’t need any delay at*  
50 *all.” (Midwife, Lacor Hospital)*  
51  
52  
53  
54  
55  
56  
57  
58  
59  
60

1  
2  
3 The system for government facilities is not any different. The ambulances are stationed at the  
4 regional referral and district hospitals, but they have inadequate fuel most times.  
5  
6  
7

8 *“For us, we have to call the district hospital for the ambulance. But you have to wait until the*  
9 *attendants get money for fuel” (Midwife from H/C III, who escorted a d mother referred to Lira*  
10 *RRH)*  
11  
12  
13

14  
15 It was reported that some patients are so poor and can spend the whole day trying to raise money for  
16 fuel. In some cases, they have to first go back home and sell land or animals.  
17  
18  
19

### 20 **Zigzagging referrals**

21  
22 In one of the pathways, we also noted a back and forth referral pattern. As illustrated in Figure 9,  
23 each facility refers to the other in a zigzagging manner after failing to carry out a diagnostic test or  
24 an operation.  
25  
26  
27

### 28 **Discussion:**

29  
30 Although maternal deaths and near-misses have been largely studied with a major focus on  
31 biological causes of death, this study elucidated some intriguing reasons why mothers die even after  
32 making early contact with formal healthcare. In the pathways that we analysed, all the women took  
33 much longer than the common threshold while at the health facilities and got complications. This is  
34 consistent with the definition of the duration of the third delay by Edson et al [24]. The pathways to  
35 maternal mortality are highly influenced by a shortage of medicines and supplies necessary for  
36 signal functions of EmONC. Typically, patients and attendants are “shuffled around” to buy  
37 medicines and supplies; causing significant delays similar to findings from other LMICs [25, 26].  
38 Because most lower facilities lack medicines and supplies, some women had to trek across districts  
39 to access BEmONC services. This is contrary to the WHO recommendation of accessibility within 5  
40 kilometres [27].  
41  
42  
43  
44  
45  
46  
47  
48  
49

50  
51 As illustrated in the various pathways in this study, women who require CEmONC services often  
52 face significant challenges. Similar to most LMICs, lack of blood and blood products, gaps in  
53 coverage by doctors and anesthetists, and power outages were major hindrances to accessing  
54  
55  
56  
57  
58  
59  
60

1  
2  
3 emergency operations [28, 29]. Even in cases where emergency caesarean sections were done, it  
4 took longer than the thirty-minute to the one-hour interval of the decision to knife-on-skin as  
5 stipulated in some guidelines [30, 31].  
6  
7

8  
9 The pathways described in this study show that women experience significant “passive delays” due  
10 to limited practical capacity to identify and treat obstetric emergencies even in facilities with a fair  
11 stock of EmONC tracer drugs. Similarly, a study done in Kenya found that the availability of signal  
12 functions alone does not directly translate into a readiness to manage obstetric emergencies, but  
13 rather a clinical cascade that involves the ability to identify the emergency, treat it, and monitor-  
14 modify therapy [32]. Women who were first assessed by personnel with suboptimal midwifery skills  
15 like general nurses, nursing assistants, and TBAs were likely to die in most of the pathways. Some  
16 studies have found that these women receive wrong medicines, are not monitored, and are often  
17 referred late [33, 34].  
18  
19  
20  
21  
22  
23  
24

25 Evidence from LMICs shows that most BEmONC facilities refer between 60-80% of their patients  
26 to CEmONC facilities [35-37]. A good referral system is therefore very important for good maternal  
27 and neonatal outcomes [38, 39]. Similar to a study by Elmusharaf *et al* 2017, our study elucidated  
28 four patterns of delays in the inter-facility referrals: delay in deciding to refer, referral through  
29 multiple non-functioning CEmONC facilities, back-and-forth referrals, and by-passing CEmONC  
30 facilities that are deemed non-functional [40]. The major point of delay in the referral system was  
31 the first point of care and often related to the capacity to identify complications promptly as  
32 highlighted in some studies [40, 41].  
33  
34  
35  
36  
37  
38  
39

40 This study had some limitations that warrant cautious generalisation of the findings. We carried out  
41 all the interviews at the health facilities and this may pose response bias. However, we compared  
42 responses from respondents along similar pathways to eliminate gross response bias. Secondly, part  
43 of this study focused on the referral system, the addition of two tertiary facilities in Lira without  
44 additional step-down health centres might be a limitation to saturation of data and might not fully  
45 present the PHCC experience. Additionally, critical case sampling could be biased by the  
46 researchers’ selection interests. However, the researchers used independent MPDSR teams at the  
47 tertiary hospitals to identify the cases based on the principles of analytical generalisation. Overall,  
48 the concept and understanding used in this study are transferable.  
49  
50  
51  
52  
53  
54  
55  
56  
57  
58  
59  
60



**Conclusion:**

This study elucidated pathways typically characterised by delays at the health facilities. These pathways provide a novel framework to assess, track and improve the health facility's practical readiness to identify and treat obstetric emergencies. For example, health workers can work with mothers during the antenatal period to identify suitable blood donors and include this on the antenatal chart or engage with Uganda Midwives and Nurses Council to address gaps in midwifery training like access to teaching hospitals and internship opportunities. The pathways also provide a qualitative, critical approach to clearly describe the third delay.

**Availability of data and materials:**

The materials presented here can be got from the corresponding author upon reasonable request.

**Conflict of interest:**

The authors declare no conflict of interest.

**Funding:**

This research received no specific grant from any funding agency in the public, commercial, or not-for-profit sectors.

**Acknowledgements:**

We are grateful to the patients and all the key-informants for accepting to be interviewed. Special thanks go to MoCHeLaSS project for training the study team on research methods. We thank Dr. Oneka Francis and Okot Solomon Nono for editing images to meet the standards. The team appreciates the initial work on the CIT and referral system done by Audrey Jade Paris, under the supervision of Prof. Christina Zarowsky, through the MoCHeLaSS project.

**Author contributions:**

GA, AM, and EO conceived the idea and wrote the design. VN and GA collected data. GA and EO carried out data analysis and writing the manuscript. PB and JB did the overall review and editing.

## References:

1. Organization, W.H., *Trends in maternal mortality 2000 to 2017: estimates by WHO, UNICEF, UNFPA, World Bank Group and the United Nations Population Division*. 2019.
2. Alkema, L., et al., *Global, regional, and national levels and trends in maternal mortality between 1990 and 2015, with scenario-based projections to 2030: a systematic analysis by the UN Maternal Mortality Estimation Inter-Agency Group*. *The Lancet*, 2016. **387**(10017): p. 462-474.
3. Murray, C.J., et al., *Armed conflict as a public health problem*. *BMJ*, 2002. **324**(7333): p. 346-349.
4. UDHS, I., *Uganda demographic and health survey*. Uganda Bureau of Statistics, Kampala Uganda, 2011.
5. Uganda Bureau of Statistics (UBOS) and ICF, *Uganda Demographic and Health Survey 2016: Key Indicators Report*. 2017, UBOS and Rockville: Kampala, Uganda, and Maryland, USA.
6. Liebling, H., H. Barrett, and L. Artz, *South Sudanese refugee survivors of sexual and gender-based violence and torture: health and justice service responses in northern Uganda*. *International journal of environmental research and public health*, 2020. **17**(5): p. 1685.
7. Chi, P.C., et al., *Perceptions of the effects of armed conflict on maternal and reproductive health services and outcomes in Burundi and Northern Uganda: a qualitative study*. *BMC international health and human rights*, 2015. **15**(1): p. 7.
8. Ngonzi, J., et al., *Puerperal sepsis, the leading cause of maternal deaths at a Tertiary University Teaching Hospital in Uganda*. *BMC pregnancy and childbirth*, 2016. **16**(1): p. 207.
9. Mukasa, P.K., et al., *Uterine rupture in a teaching hospital in Mbarara, western Uganda, unmatched case-control study*. *Reproductive health*, 2013. **10**(1): p. 29.
10. Zaba, B., et al., *HIV and mortality of mothers and children: evidence from cohort studies in Uganda, Tanzania, and Malawi*. *Epidemiology*, 2005: p. 275-280.
11. Thaddeus, S. and D. Maine, *Too far to walk: maternal mortality in context*. *Social science & medicine*, 1994. **38**(8): p. 1091-1110.
12. Goodman, D.M., et al., *The third delay: understanding waiting time for obstetric referrals at a large regional hospital in Ghana*. *BMC pregnancy and childbirth*, 2017. **17**(1): p. 216.
13. Knight, H.E., A. Self, and S.H. Kennedy, *Why are women dying when they reach hospital on time? A systematic review of the 'third delay'*. *PloS one*, 2013. **8**(5).
14. Bayo, P., et al., *Estimating the met need for emergency obstetric care (EmOC) services in three payams of Torit County, South Sudan: a facility-based, retrospective cross-sectional study*. *BMJ open*, 2018. **8**(2): p. e018739.
15. Holmer, H., et al., *The global met need for emergency obstetric care: a systematic review*. *BJOG: An International Journal of Obstetrics & Gynaecology*, 2015. **122**(2): p. 183-189.
16. Admasu, K., A. Haile-Mariam, and P. Bailey, *Indicators for availability, utilization, and quality of emergency obstetric care in Ethiopia, 2008*. *International Journal of Gynecology & Obstetrics*, 2011. **115**(1): p. 101-105.
17. Ameh, C., et al., *Status of emergency obstetric care in six developing countries five years before the MDG targets for maternal and newborn health*. *PloS one*, 2012. **7**(12).
18. Flanagan, J.C., *The critical incident technique*. *Psychological Bulletin*, 1954. **51**(4): p. 327.
19. Viergever, R.F., *The critical incident technique: method or methodology?* *Qualitative health research*, 2019. **29**(7): p. 1065-1079.
20. Kempainen, J.K., *The critical incident technique and nursing care quality research*. *Journal of advanced nursing*, 2000. **32**(5): p. 1264-1271.
21. Cunningham, U., A. De Brún, and E. McAuliffe, *Application of the critical incident technique in refining a realist initial programme theory*. *BMC Medical Research Methodology*, 2020. **20**: p. 1-16.

22. Etikan, I., S.A. Musa, and R.S. Alkassim, *Comparison of convenience sampling and purposive sampling*. American journal of theoretical and applied statistics, 2016. **5**(1): p. 1-4.
23. Clarke, V., V. Braun, and N. Hayfield, *Thematic analysis*. Qualitative psychology: A practical guide to research methods, 2015: p. 222-248.
24. Edson, W., et al., *Safe motherhood studies-timeliness of in-hospital care for treating obstetric emergencies: results from Benin, Ecuador, Jamaica, and Rwanda*. Washington: United States Agency for International Development, 2006.
25. Mgawadere, F., et al., *Factors associated with maternal mortality in Malawi: application of the three delays model*. BMC pregnancy and childbirth, 2017. **17**(1): p. 219.
26. Pacagnella, R.C., et al., *Delays in receiving obstetric care and poor maternal outcomes: results from a national multicentre cross-sectional study*. BMC pregnancy and childbirth, 2014. **14**(1): p. 159.
27. WHO, U. and UNICEF, *AMDD. Monitoring emergency obstetric care: a handbook*. Geneva: World Health Organization; 2009. 2016.
28. Ackers, L., E. Ioannou, and J. Ackers-Johnson, *The impact of delays on maternal and neonatal outcomes in Ugandan public health facilities: the role of absenteeism*. Health Policy and Planning, 2016. **31**(9): p. 1152-1161.
29. Urassa, E., et al., *Operational factors affecting maternal mortality in Tanzania*. Health policy and planning, 1997. **12**(1): p. 50-57.
30. Excellence, N.I.f.C., *Caesarean Section—NICE clinical guideline 132*. London)(<https://www.nice.org.uk/guidance/cg132> [accessed May 2016]), 2012.
31. Practice, A.C.o.O., *ACOG committee opinion No. 433: optimal goals for anesthesia care in obstetrics*. Obstetric Anesthesia Digest, 2010. **30**(2): p. 78.
32. Cranmer, J.N., et al., *Beyond signal functions in global obstetric care: Using a clinical cascade to measure emergency obstetric readiness*. PloS one, 2018. **13**(2): p. e0184252.
33. Paul, B., B. Mohapatra, and K. Kar, *Maternal deaths in a tertiary health care centre of Odisha: an in-depth study supplemented by verbal autopsy*. Indian journal of community medicine: official publication of Indian Association of Preventive & Social Medicine, 2011. **36**(3): p. 213.
34. Pacagnella, R.C., et al., *The role of delays in severe maternal morbidity and mortality: expanding the conceptual framework*. Reproductive health matters, 2012. **20**(39): p. 155-163.
35. Jahn, A., M. Kowalewski, and S.S. Kimatta, *Obstetric care in southern Tanzania: does it reach those in need?* Tropical Medicine & International Health, 1998. **3**(11): p. 926-932.
36. Nkyekyer, K., *Peripartum referrals to Korle Bu teaching hospital, Ghana—a descriptive study*. Tropical Medicine & International Health, 2000. **5**(11): p. 811-817.
37. Bailey, P.E., et al., *Referral patterns through the lens of health facility readiness to manage obstetric complications: national facility-based results from Ghana*. Reproductive health, 2019. **16**(1): p. 19.
38. Yego, F., et al., *A retrospective analysis of maternal and neonatal mortality at a teaching and referral hospital in Kenya*. Reproductive health, 2013. **10**(1): p. 13.
39. Ramaswamy, R., et al., *Transforming maternal and neonatal outcomes in tertiary hospitals in Ghana: an integrated approach for systems change*. Journal of Obstetrics and Gynaecology Canada, 2015. **37**(10): p. 905-914.
40. Elmusharaf, K., et al., *Patterns and determinants of pathways to reach comprehensive emergency obstetric and neonatal care (CEmONC) in South Sudan: qualitative diagrammatic pathway analysis*. BMC pregnancy and childbirth, 2017. **17**(1): p. 278.
41. Nuamah, G.B., et al., *Incentives to yield to obstetric referrals in deprived areas of Amansie west district in the Ashanti region, Ghana*. International journal for equity in health, 2016. **15**(1): p. 117.

**Figure legend:**

**Figure 1** Barriers along the pathway to receive care after reaching the health facility.

**Figure 2** Delayed referral and by-passing non-functional facility. She experienced headache for two weeks at home before going to the H/C II where a diagnosis of severe pre-eclampsia was made. There were no antihypertensive and anticonvulsants. She was referred to the nearby H/C IV but after calling the midwife in-charge they were told that theatre is closed because of no anesthetic drugs. They decided to by-pass this health centre and move to Lacor hospital, about 90 km away. At Lacor hospital, she received anticonvulsants and antihypertensive. She was taken to the operating room for an emergency caesarean section where a live baby was delivered. The mother was discharged alive but with a stroke. (MNM1).

**Figure 3** Lack of blood. She experienced labour pains for one day and bleeding for 4 hours before going to the Regional Referral Hospital. She had a fresh stillbirth and developed post-partum hemorrhage. The doctor requested three units of blood but there was no blood. She was referred to Lacor Hospital with severe anaemia. At Lacor Hospital there was no blood as well; she died at the admission point. (MD1).

**Figure 4** Multiple referrals across non-functional CEmONC facilities. She had antepartum hemorrhage (APH) and went to the H/C IV but the midwife referred her to the District Hospital for an ultrasound scan; it confirmed complete placenta praevia. A decision to do an emergency caesarean section was made but the operating room did not have electricity prompting referral to the Regional Referral Hospital (RRH). At the RRH she spent six hours looking for money to buy drugs for anesthesia. After failing to get the money, she was verbally referred to Lacor Hospital but had bled a lot and died of hemorrhagic shock. (MD2).

**Figure 5** Delayed referral and operation. At the health centre III, there was no midwife. The nurse who attended to her did not plot a partograph and kept her for 3 days. The patient requested a referral to H/C IV where she was found to have obstructed labour but there was no doctor to do a caesarean section. She was referred to Lacor hospital with prolonged obstructed labour and a dead foetus. Emergency caesarean section was done, taken to the intensive care unit (ICU), but got sepsis and died. (MD3).

1  
2  
3 **Figure 6** Non-functional facility and seeking care from the TBA. She had labour pain for 3 hours  
4 then went to the TBA because the nearby H/C III had no midwife. The TBA kept her for two days  
5 until she failed to deliver. The mother was referred to the district hospital but the doctor was not  
6 available over the weekend prompting referral to Lacor hospital. She had a ruptured uterus and died  
7 of septic shock 4 days after the operation. (MD4)  
8  
9

10  
11  
12 **Figure 7** Non-functional BEmONC facility and seeking care from the religious leader. The woman  
13 suddenly collapsed from the garden. She was taken to the H/C III and found the maternity unit  
14 closed because there was no midwife. After two episodes of convulsions, the husband gave her raw  
15 eggs and inserted a spoon in the mouth to stop her from biting the tongue. The mother-in-law  
16 advised that the woman should be taken for prayers at the pastor's place since the condition could be  
17 related to evil spirits. She spent six hours with the pastor but continued to fit. When she deteriorated,  
18 the husband rushed her to Lacor hospital where the blood pressure was found to be very high. She  
19 was given treatment but died after 30 minutes due to eclampsia. A perimortem operation was done  
20 and extracted a live baby. (MD5).  
21  
22  
23  
24  
25  
26  
27

28 **Figure 8** Skills of the health workers. She experienced labour pain for two days before going to the  
29 health centre. The midwife received her and gave her a bed without proper assessment. After three  
30 days of active contractions and exhaustion, the attendants requested a referral to Lacor hospital. She  
31 arrived at Lacor hospital with a ruptured uterus and was discharged with a vesicovaginal fistula.  
32 (MNM2).  
33  
34  
35  
36  
37

38 **Figure 9** Back and forth referral due to lack of diagnostics. She had an unsafe abortion then went to  
39 H/C IV. The doctor reviewed and started her on antibiotics and intravenous fluids. She was referred  
40 to the district hospital for an abdominal ultrasound scan and complete blood count. Unfortunately,  
41 these investigations could not be done. She was again referred to a private medical centre for an  
42 ultrasound scan that showed massive pyoperitoneum. The operation could not be done because there  
43 was no electricity. The family requested a referral to Lacor hospital where the operation was done;  
44 the uterus was removed and discharged alive after 5 days. (MNM3).  
45  
46  
47  
48  
49  
50  
51  
52  
53  
54  
55  
56  
57  
58  
59  
60

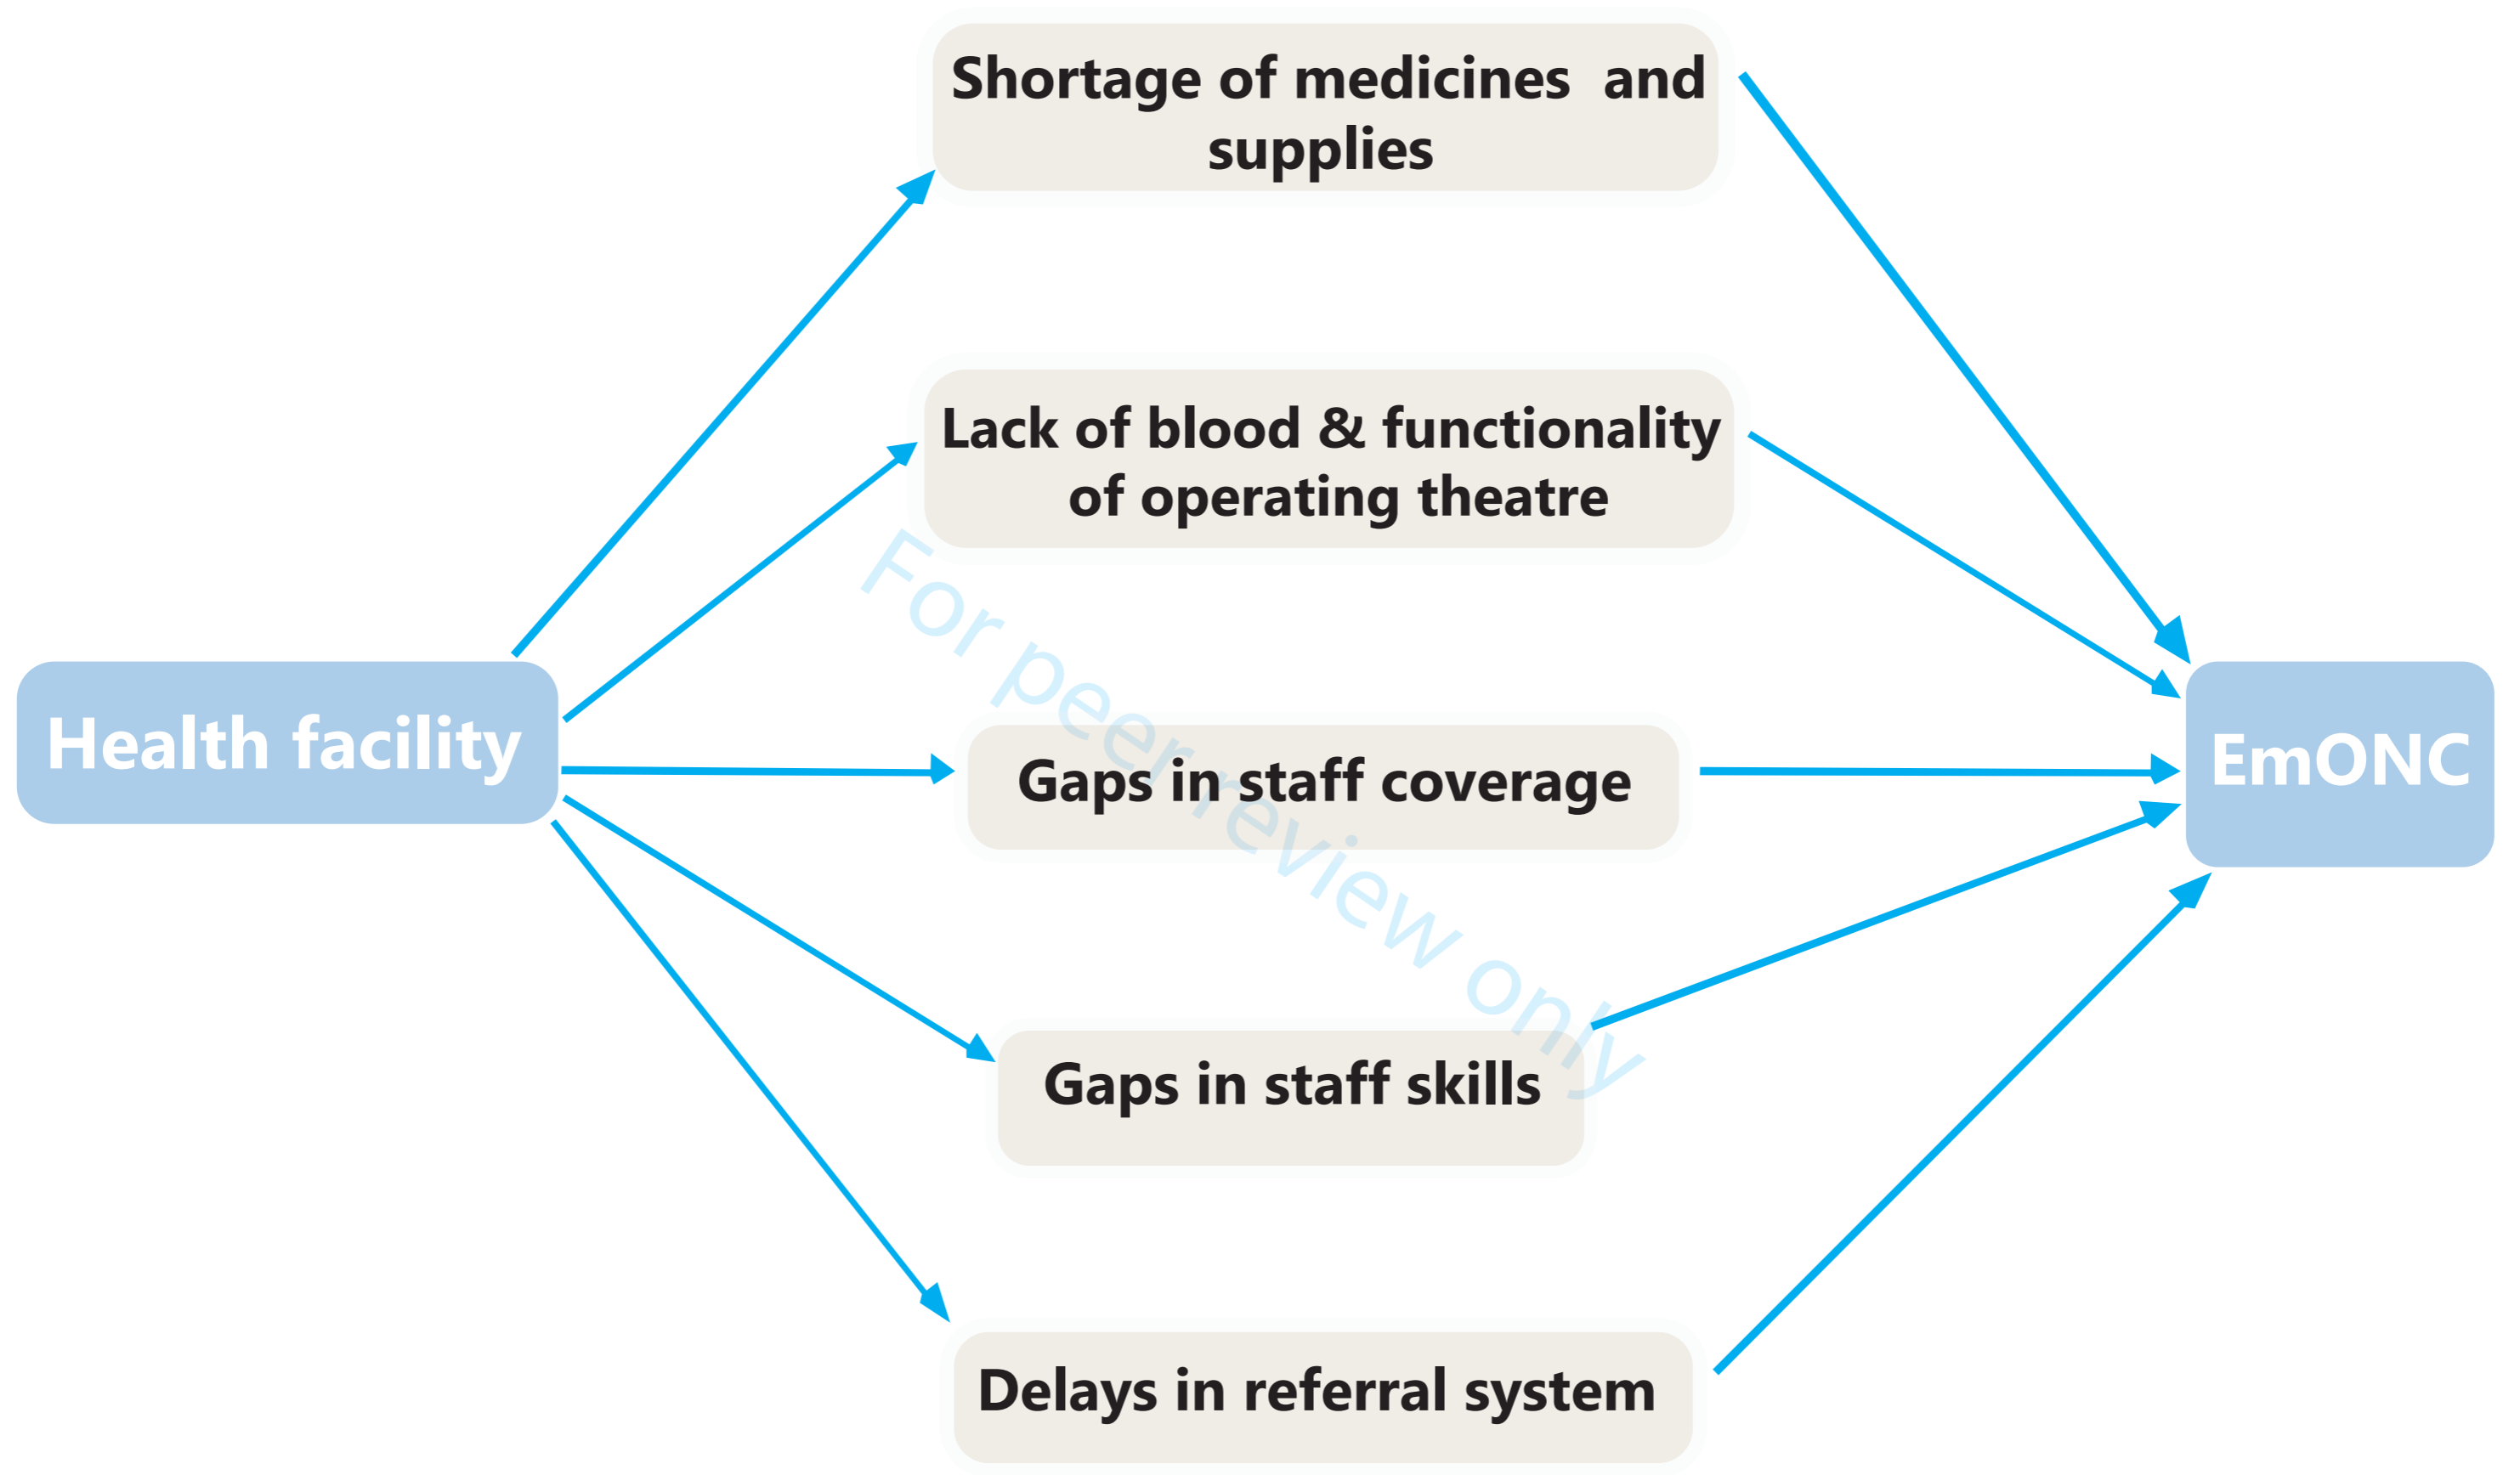

## Delays at the facility

1  
2  
3  
4  
5  
6  
7  
8  
9  
10  
11  
12  
13  
14  
15  
16  
17  
18  
19  
20  
21  
22  
23  
24  
25  
26  
27  
28  
29  
30  
31  
32  
33  
34  
35  
36  
37  
38  
39  
40  
41  
42  
43  
44  
45  
46  
47  
48  
49  
50  
51  
52  
53  
54  
55  
56  
57  
58  
59  
60

**Woman's home**

**Health centre II**

**Health centre IV**

**Lacor Hospital**

1  
2  
3  
4  
5  
6  
7  
8  
9  
10  
11  
12  
13  
14  
15  
16  
17  
18  
19  
20  
21  
22  
23  
24  
25  
26  
27  
28  
29  
30  
31  
32  
33  
34  
35  
36  
37  
38  
39  
40  
41  
42  
43  
44  
45  
46  
47  
48  
49  
50  
51  
52  
53  
54  
55  
56  
57  
58  
59  
60

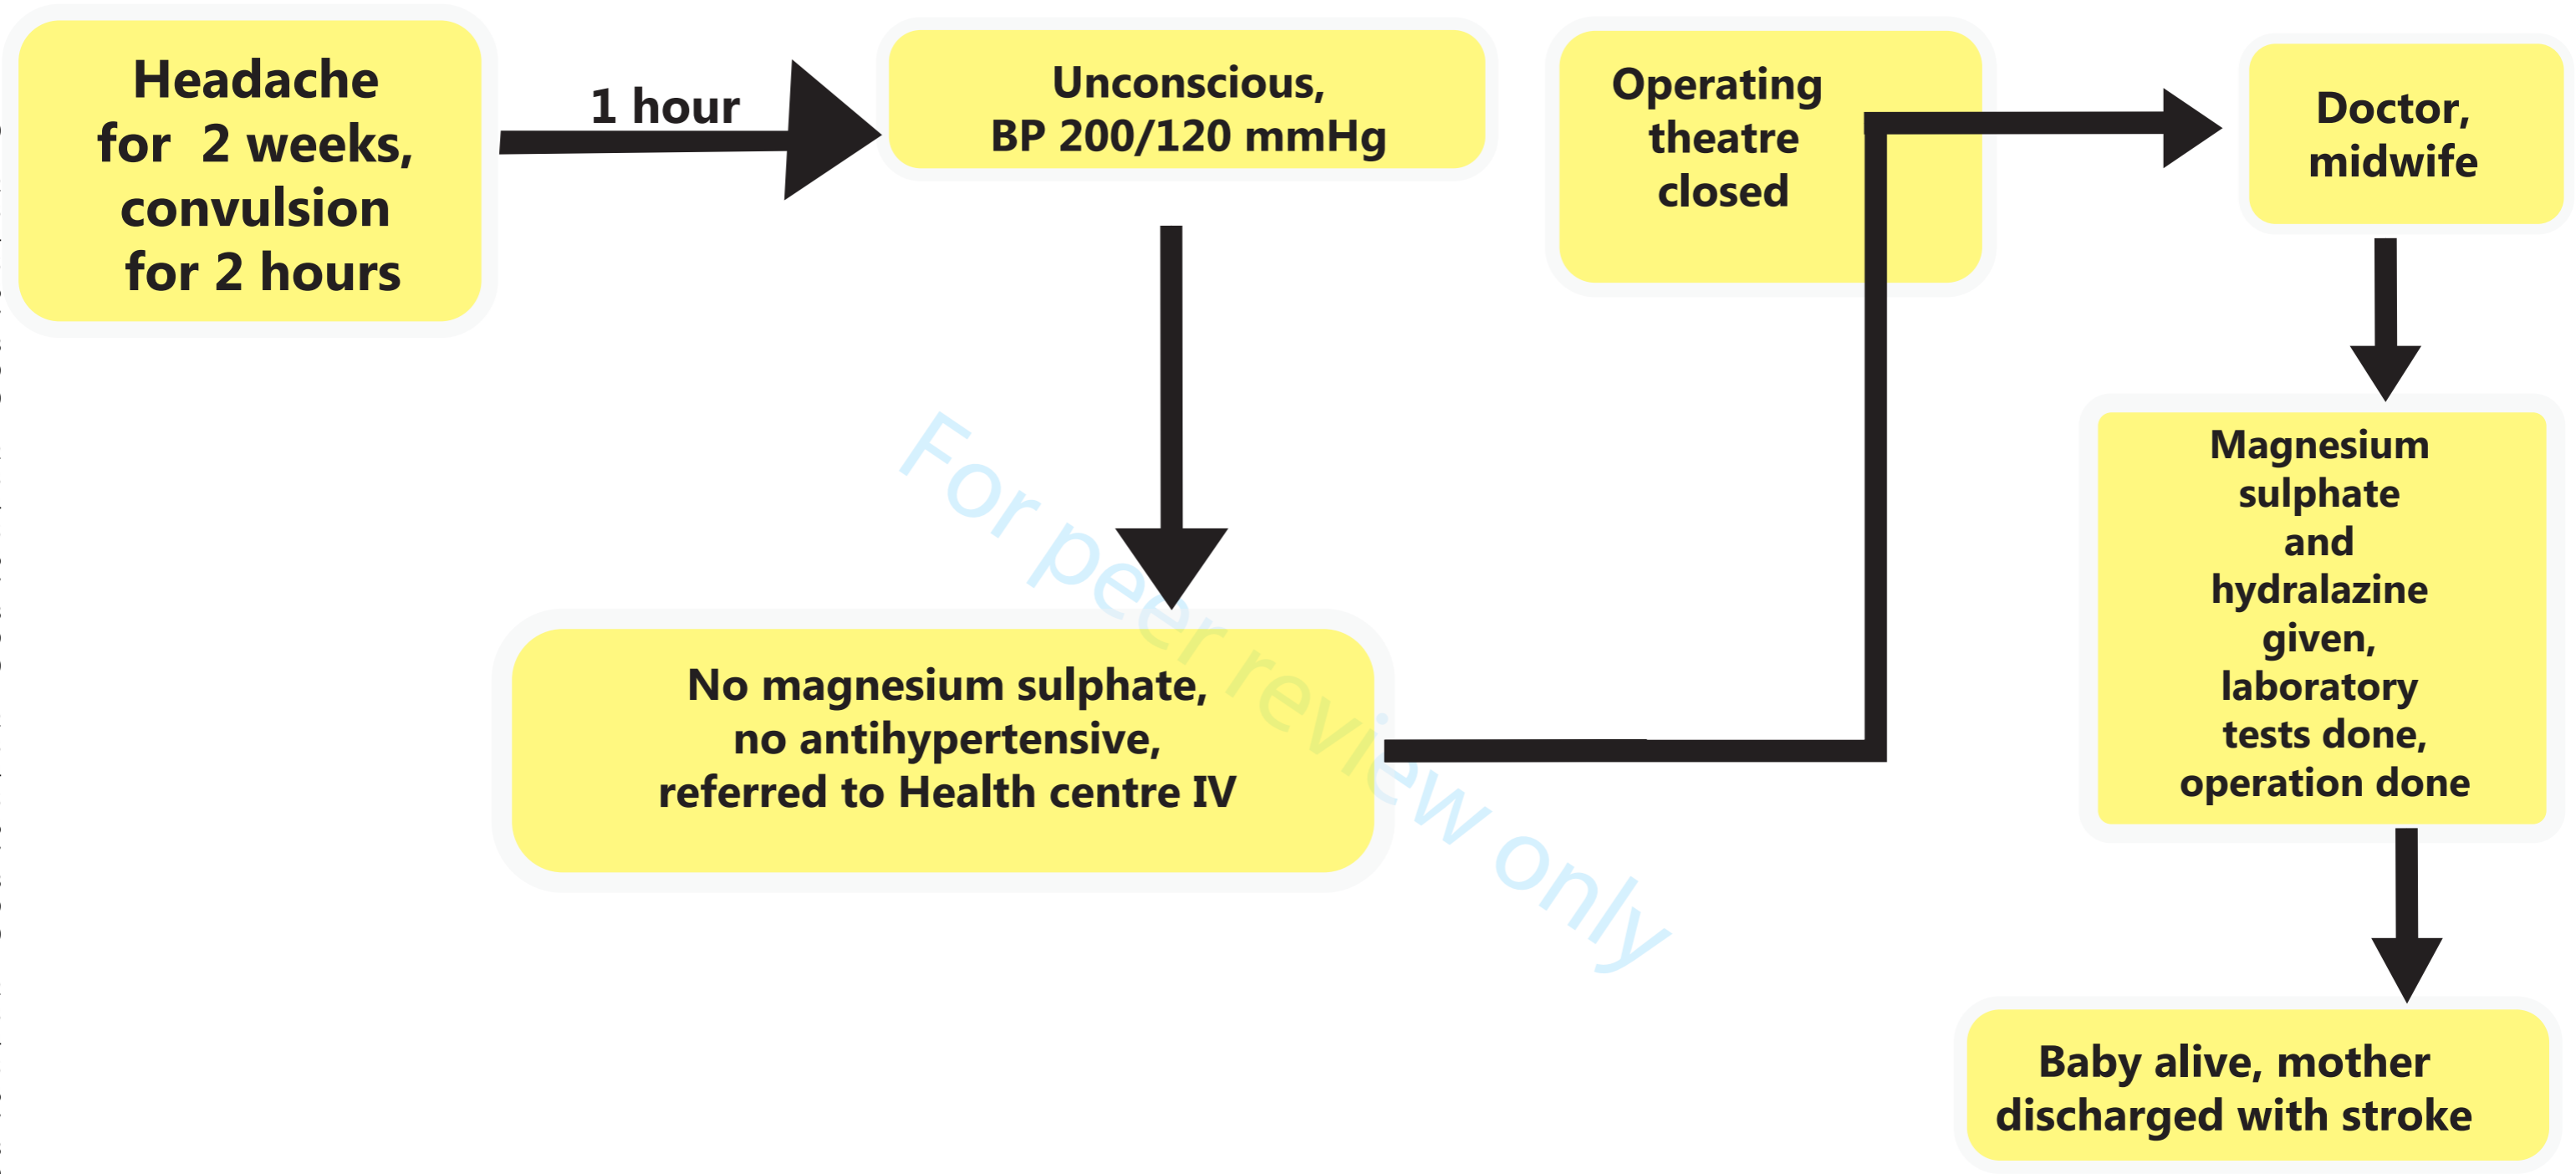

1  
2  
3  
4  
5  
6  
7  
8  
9  
10  
11  
12  
13  
14  
15  
16  
17  
18  
19  
20  
21  
22  
23  
24  
25  
26  
27  
28  
29  
30  
31  
32  
33  
34  
35  
36  
37  
38  
39  
40  
41  
42  
43  
44  
45  
46  
47  
48  
49  
50  
51  
52  
53  
54  
55  
56  
57  
58  
59  
60

### Woman's home

### Regional Referral Hospital

### Lacor Hospital

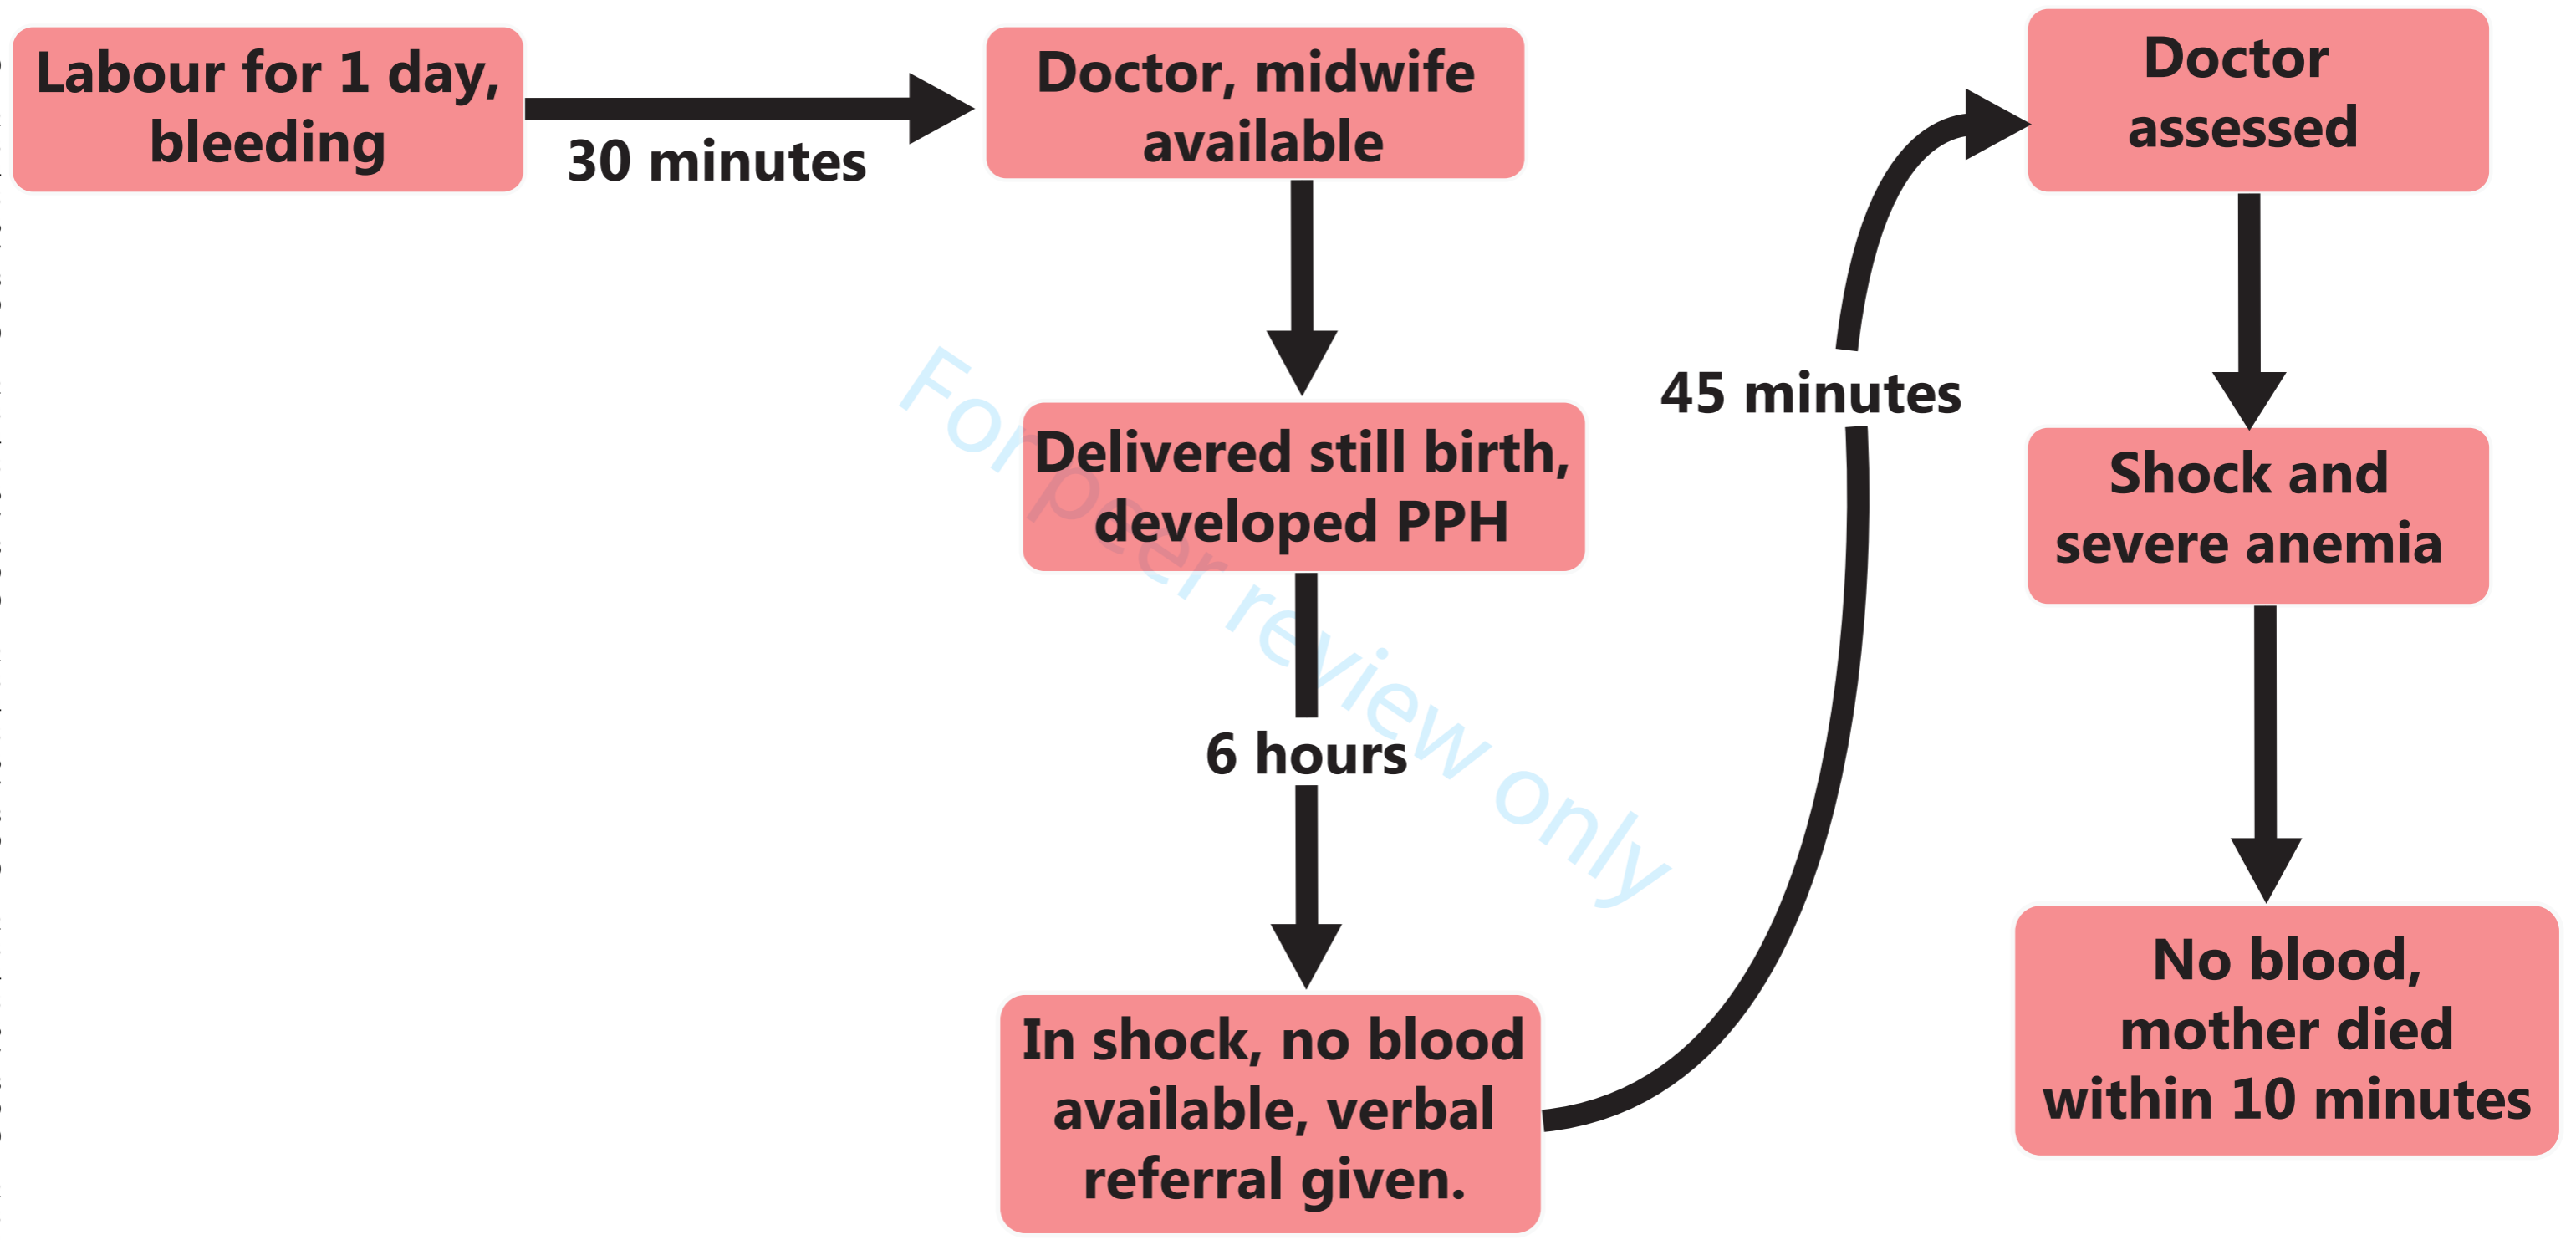



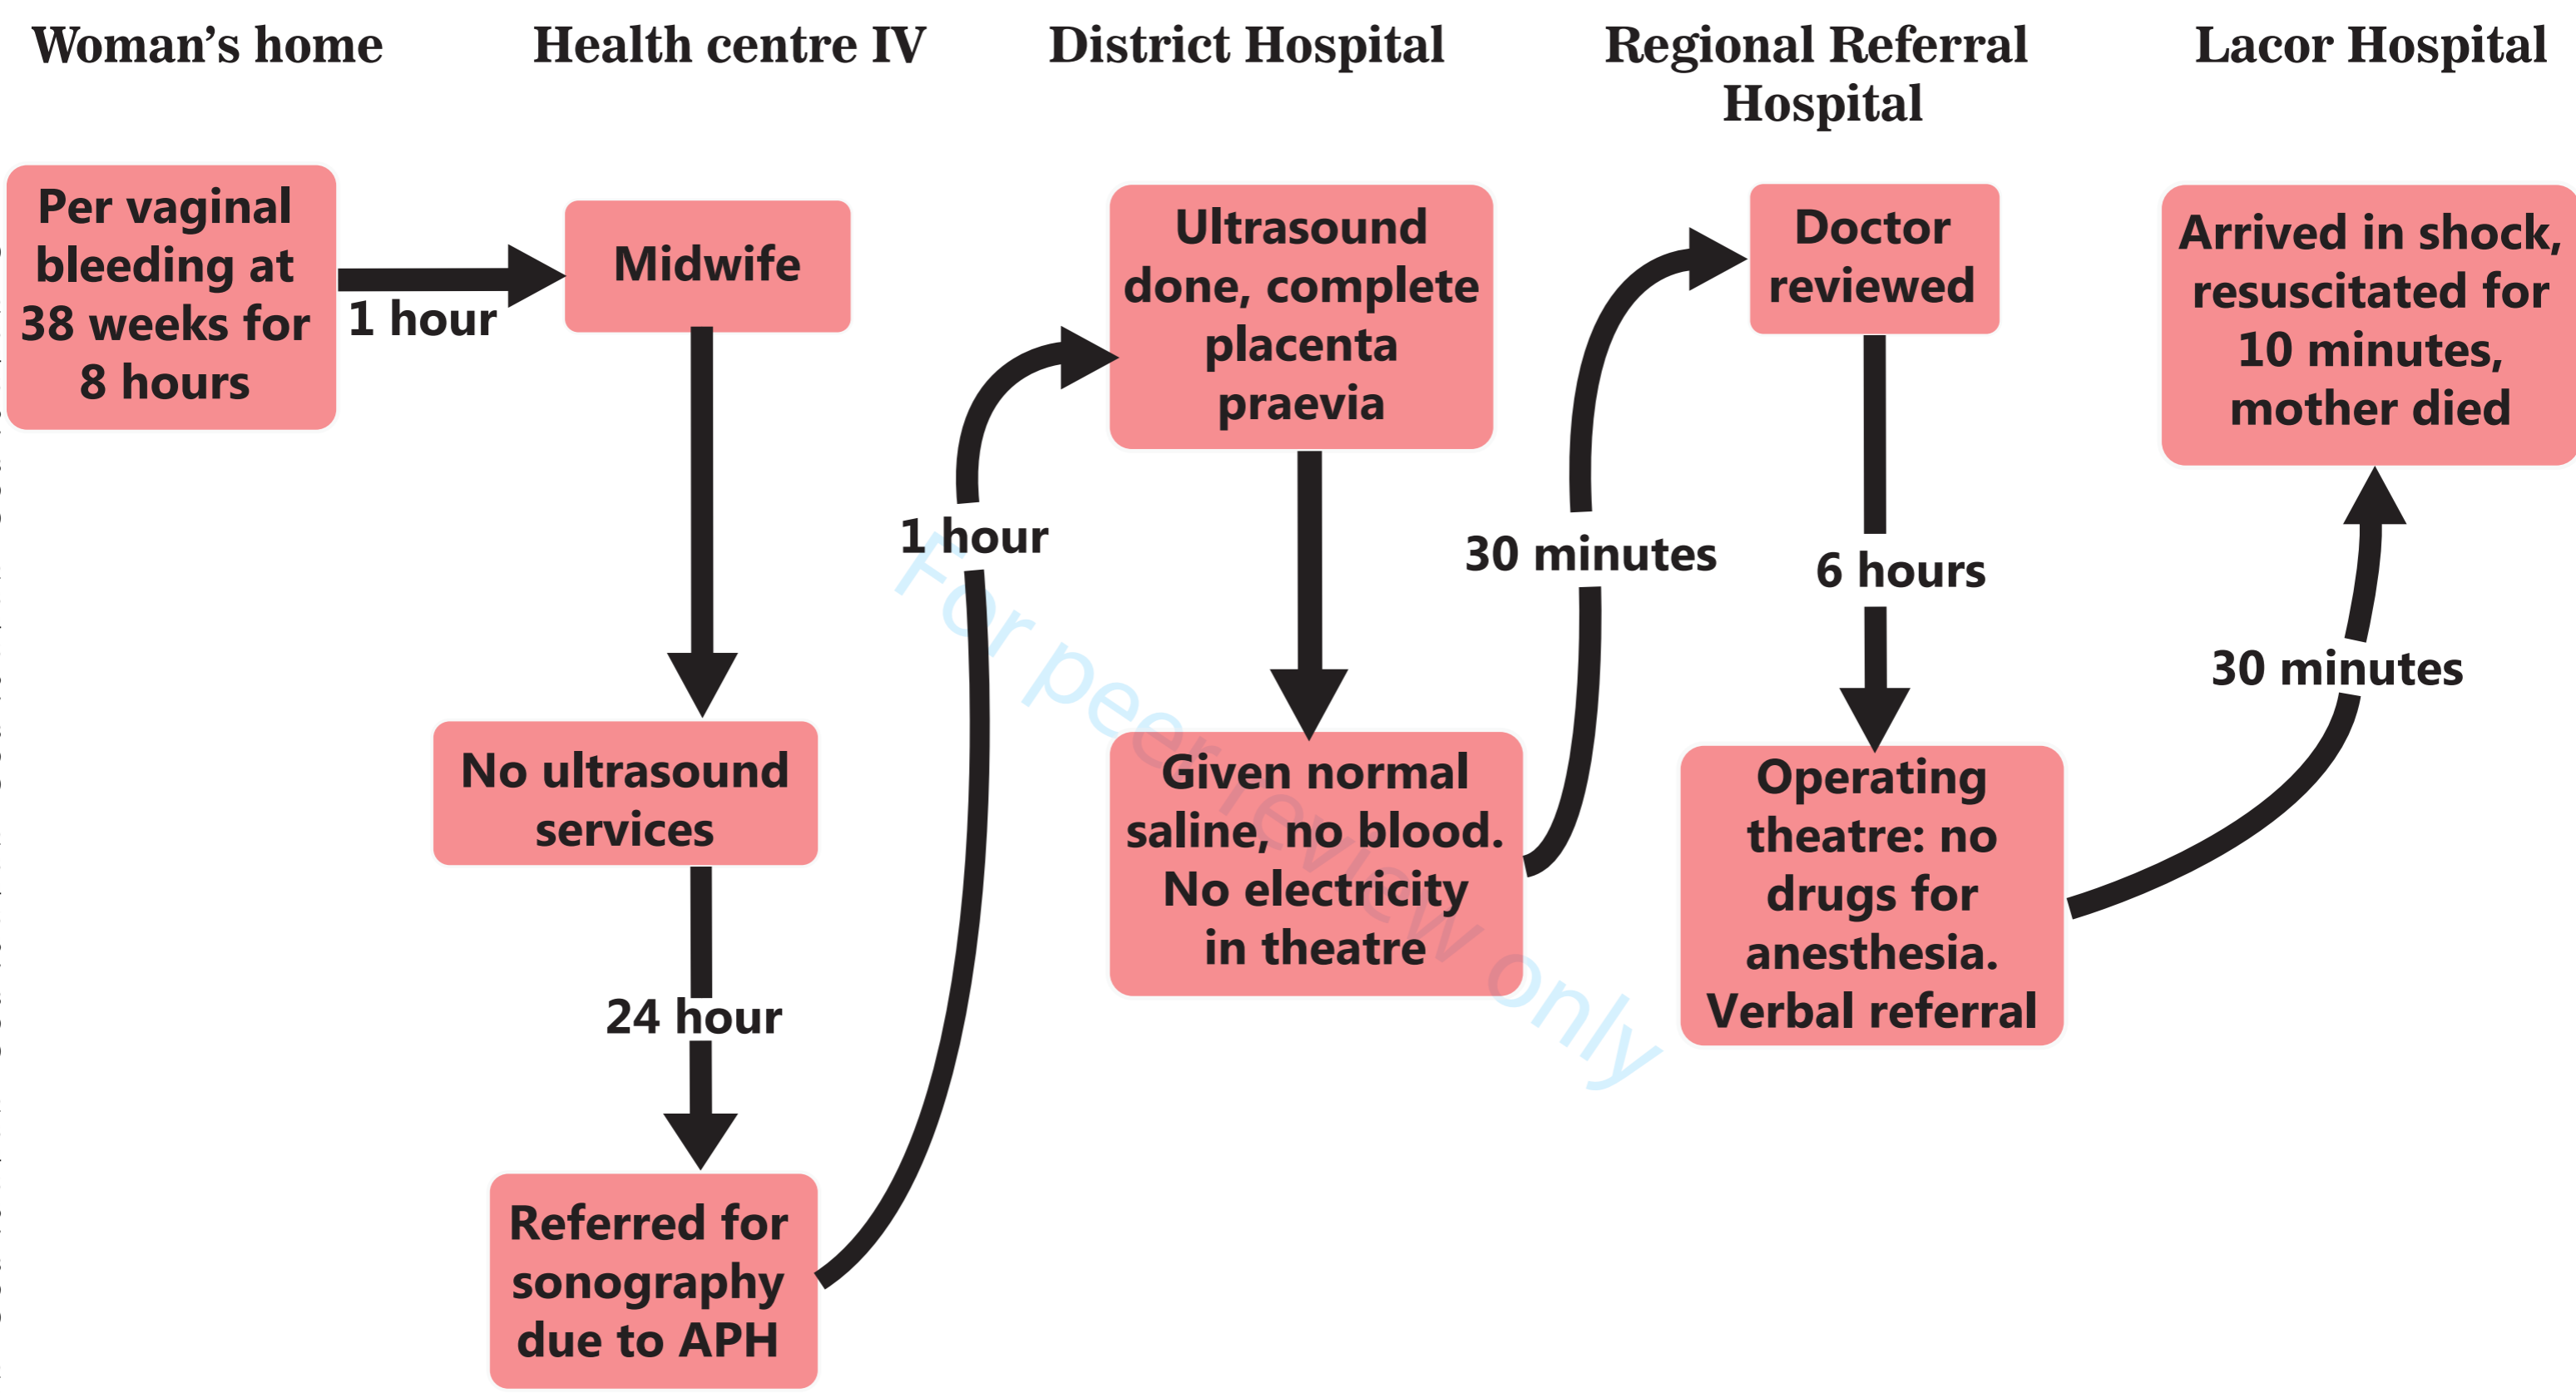

# Woman's home

# Health centre III

# Health centre IV

# Lacor Hospital

**16 year old  
prime gravida**

**Nurse available,  
no midwife**

**Midwife available,  
no doctor  
(weekend)**

**Midwife and  
doctor  
available**

**Labour pains  
for 5 hours**

**Failed to  
deliver,  
Referred to  
H/C IV**

**Assessed by  
midwife  
and started on  
patograph**

**Obstructed labour,  
IUFD, ruptured  
uterus**

**Laparotomy,  
still birth,  
necrotic uterus,  
hysterectomy done**

**Obstructed labour,  
operating theatre  
not functional**

**To ICU, septic shock,  
died 7 days later**

1 hour

3 days

1 hour

5 hours

30 minutes

8 hours

1  
2  
3  
4  
5  
6  
7  
8  
9  
10  
11  
12  
13  
14  
15  
16  
17  
18  
19  
20  
21  
22  
23  
24  
25  
26  
27  
28  
29  
30  
31  
32  
33  
34  
35  
36  
37  
38  
39  
40  
41  
42  
43  
44  
45  
46  
47  
48  
49  
50  
51  
52  
53  
54  
55  
56  
57  
58  
59  
60

**Woman's home**

**TBA's house**

**District Hospital**

**Lacor Hospital**

**Labour pain for 3 hours**

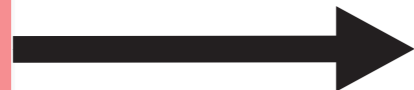

**TBA**

**2 days**

**Failed to deliver**

**1 hour**

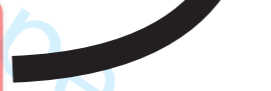

**Nurse**

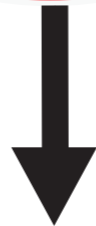

**No doctor**

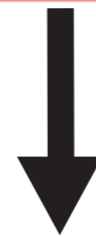

**Midwife**

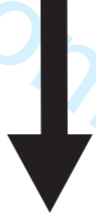

**Obstructed labour**

**2 hours**

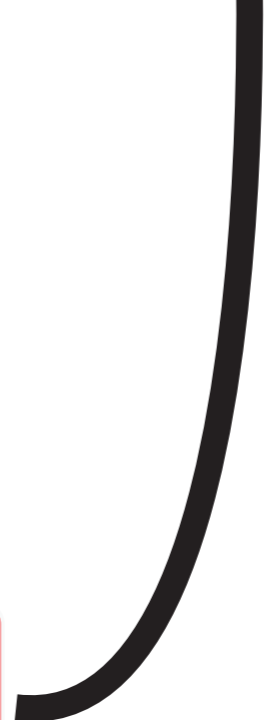

**Midwife Doctor**

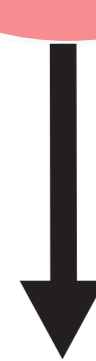

**Operating theatre, ruptured uterus**

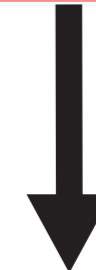

**ICU, septic shock, mother died**

1  
2  
3  
4  
5  
6  
7  
8  
9  
10  
11  
12  
13  
14  
15  
16  
17  
18  
19  
20  
21  
22  
23  
24  
25  
26  
27  
28  
29  
30  
31  
32  
33  
34  
35  
36  
37  
38  
39  
40  
41  
42  
43  
44  
45  
46  
47  
48  
49  
50  
51  
52  
53  
54  
55  
56  
57  
58  
59  
60

# Garden

# Health centre III

# Pastor's Home

# Lacor Hospital

**Woman,  
36 weeks  
pregnant,  
sudden  
collapse**

**30 min**

**Convulsions  
2 times.  
Maternity  
closed**

**Raw eggs,  
spoon inserted  
in mouth by  
husband**

**30 min**

**6 hours,  
convulsions  
4 times**

**→**

**Unconscious, BP  
200/120 mmHg**

**↓**

**Magnesium  
sulphate and  
hydralazine given**

**↓**

**Cardiac arrest,  
mother died.**

*For peer review only*

1  
2  
3  
4  
5  
6  
7  
8  
9  
10  
11  
12  
13  
14  
15  
16  
17  
18  
19  
20  
21  
22  
23  
24  
25  
26  
27  
28  
29  
30  
31  
32  
33  
34  
35  
36  
37  
38  
39  
40  
41  
42  
43  
44  
45  
46  
47  
48  
49  
50  
51  
52  
53  
54  
55  
56  
57  
58  
59  
60

**Woman's home**

**Health centre III**

**Lacor Hospital**

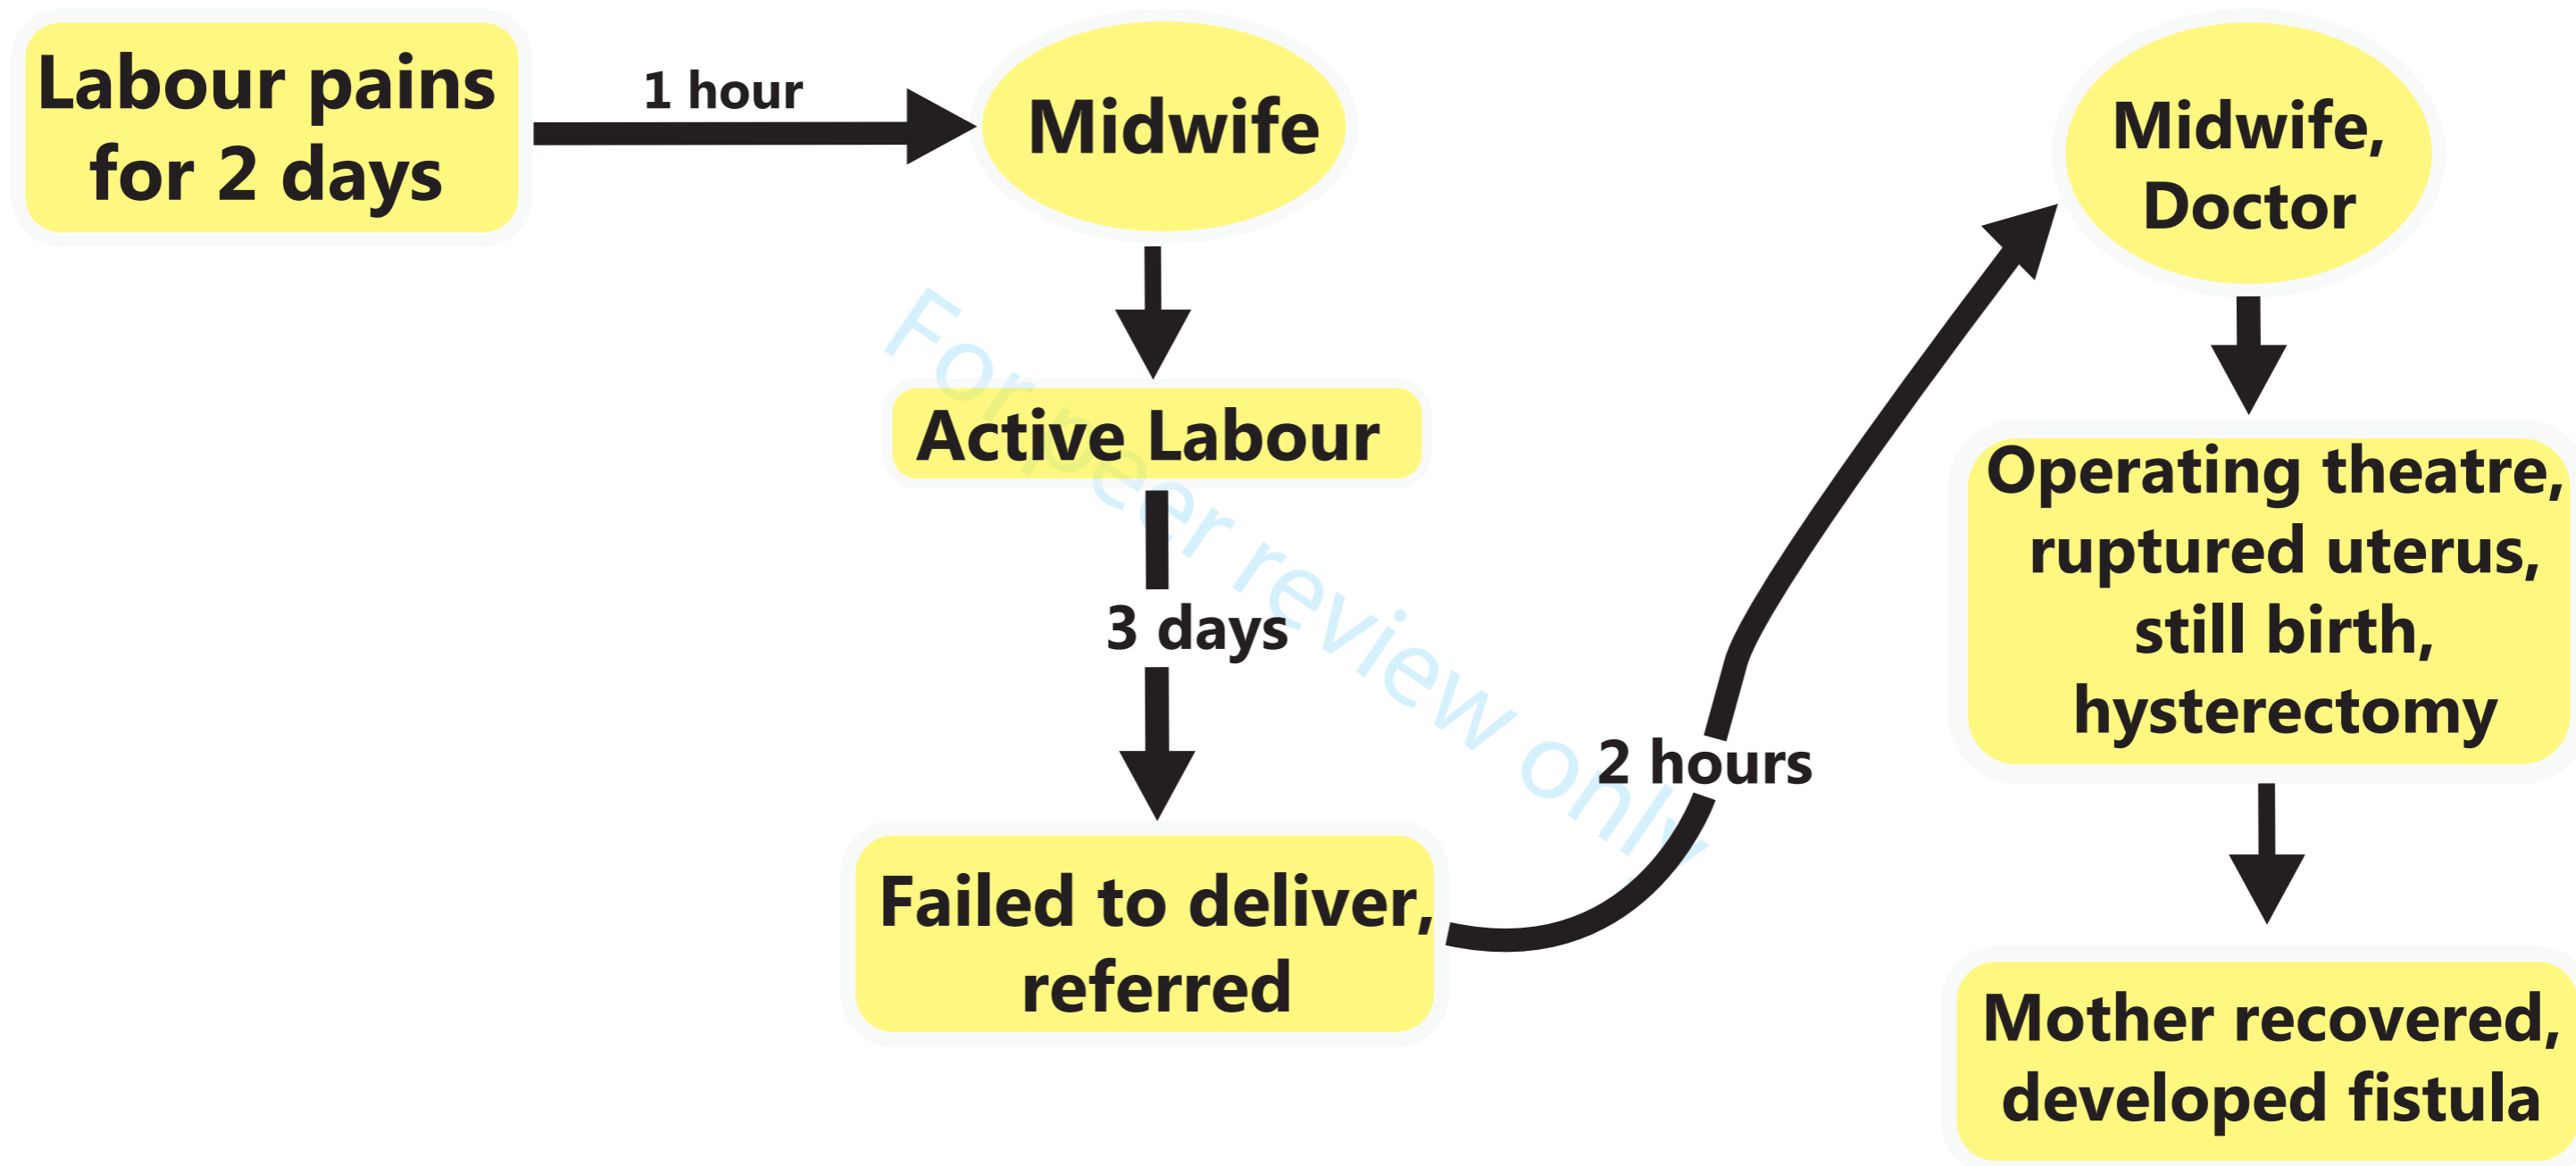

### Woman's home

### At Health centre IV

### District Hospital

### Private Clinic

### Lacor Hospital

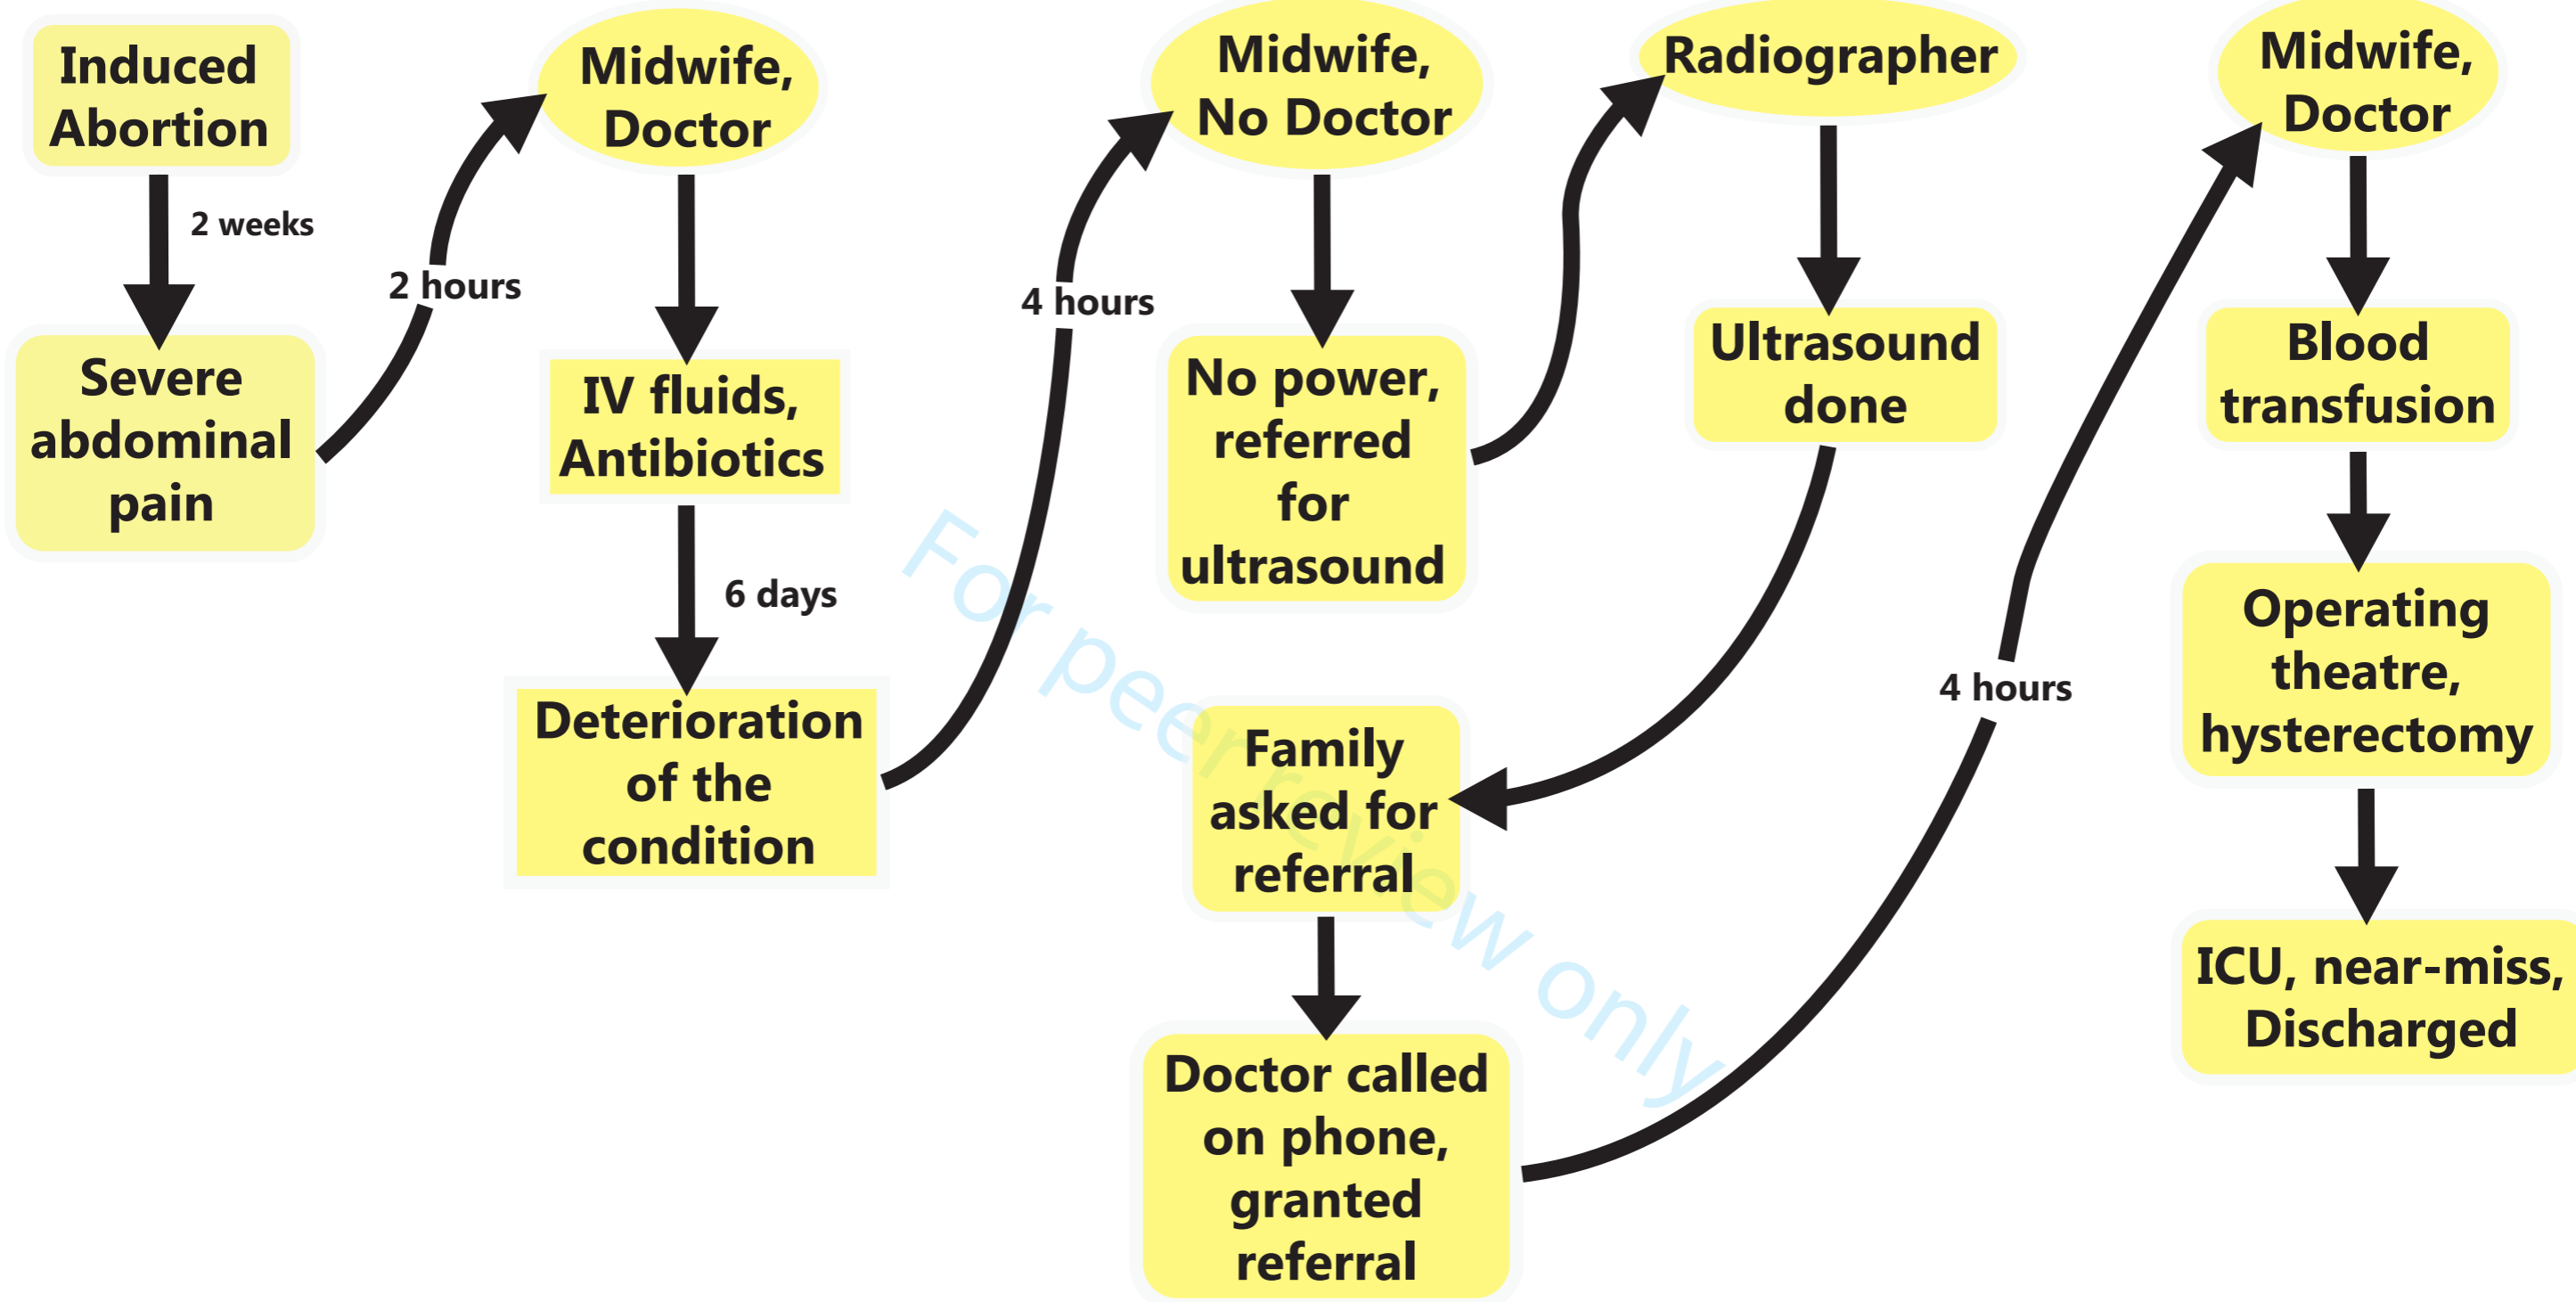

**STROBE 2007 (v4) Statement—Checklist of items that should be included in reports of *cross-sectional studies***

| Section/Topic                | Item # | Recommendation                                                                                                                                                                       | Reported on page # |
|------------------------------|--------|--------------------------------------------------------------------------------------------------------------------------------------------------------------------------------------|--------------------|
| <b>Title and abstract</b>    | 1      | (a) Indicate the study's design with a commonly used term in the title or the abstract                                                                                               | 1                  |
|                              |        | (b) Provide in the abstract an informative and balanced summary of what was done and what was found                                                                                  | 2                  |
| <b>Introduction</b>          |        |                                                                                                                                                                                      |                    |
| Background/rationale         | 2      | Explain the scientific background and rationale for the investigation being reported                                                                                                 | 4                  |
| Objectives                   | 3      | State specific objectives, including any prespecified hypotheses                                                                                                                     | 4                  |
| <b>Methods</b>               |        |                                                                                                                                                                                      | <b>5</b>           |
| Study design                 | 4      | Present key elements of study design early in the paper                                                                                                                              | 5                  |
| Setting                      | 5      | Describe the setting, locations, and relevant dates, including periods of recruitment, exposure, follow-up, and data collection                                                      | 5                  |
| Participants                 | 6      | (a) Give the eligibility criteria, and the sources and methods of selection of participants                                                                                          | 5                  |
| Variables                    | 7      | Clearly define all outcomes, exposures, predictors, potential confounders, and effect modifiers. Give diagnostic criteria, if applicable                                             | 6                  |
| Data sources/<br>measurement | 8*     | For each variable of interest, give sources of data and details of methods of assessment (measurement). Describe comparability of assessment methods if there is more than one group | 6                  |
| Bias                         | 9      | Describe any efforts to address potential sources of bias                                                                                                                            | 6                  |
| Study size                   | 10     | Explain how the study size was arrived at                                                                                                                                            | 5                  |
| Quantitative variables       | 11     | Explain how quantitative variables were handled in the analyses. If applicable, describe which groupings were chosen and why                                                         | N/A                |
| Statistical methods          | 12     | (a) Describe all statistical methods, including those used to control for confounding                                                                                                | 6                  |
|                              |        | (b) Describe any methods used to examine subgroups and interactions                                                                                                                  | N/A                |
|                              |        | (c) Explain how missing data were addressed                                                                                                                                          | 6                  |
|                              |        | (d) If applicable, describe analytical methods taking account of sampling strategy                                                                                                   | N/A                |
|                              |        | (e) Describe any sensitivity analyses                                                                                                                                                |                    |
| <b>Results</b>               |        |                                                                                                                                                                                      | 7-11               |

|                          |     |                                                                                                                                                                                                              |       |
|--------------------------|-----|--------------------------------------------------------------------------------------------------------------------------------------------------------------------------------------------------------------|-------|
| Participants             | 13* | (a) Report numbers of individuals at each stage of study—eg numbers potentially eligible, examined for eligibility, confirmed eligible, included in the study, completing follow-up, and analysed            | N/A   |
|                          |     | (b) Give reasons for non-participation at each stage                                                                                                                                                         | N/A   |
|                          |     | (c) Consider use of a flow diagram                                                                                                                                                                           |       |
| Descriptive data         | 14* | (a) Give characteristics of study participants (eg demographic, clinical, social) and information on exposures and potential confounders                                                                     | N/A   |
|                          |     | (b) Indicate number of participants with missing data for each variable of interest                                                                                                                          | N/A   |
| Outcome data             | 15* | Report numbers of outcome events or summary measures                                                                                                                                                         | N/A   |
| Main results             | 16  | (a) Give unadjusted estimates and, if applicable, confounder-adjusted estimates and their precision (eg, 95% confidence interval). Make clear which confounders were adjusted for and why they were included |       |
|                          |     | (b) Report category boundaries when continuous variables were categorized                                                                                                                                    |       |
|                          |     | (c) If relevant, consider translating estimates of relative risk into absolute risk for a meaningful time period                                                                                             |       |
| Other analyses           | 17  | Report other analyses done—eg analyses of subgroups and interactions, and sensitivity analyses                                                                                                               |       |
| <b>Discussion</b>        |     |                                                                                                                                                                                                              | 12-13 |
| Key results              | 18  | Summarise key results with reference to study objectives                                                                                                                                                     | 12    |
| Limitations              | 19  | Discuss limitations of the study, taking into account sources of potential bias or imprecision. Discuss both direction and magnitude of any potential bias                                                   | 13    |
| Interpretation           | 20  | Give a cautious overall interpretation of results considering objectives, limitations, multiplicity of analyses, results from similar studies, and other relevant evidence                                   | 13    |
| Generalisability         | 21  | Discuss the transferability of the study results                                                                                                                                                             | 13    |
| <b>Other information</b> |     |                                                                                                                                                                                                              |       |
| Funding                  | 22  | Give the source of funding and the role of the funders for the present study and, if applicable, for the original study on which the present article is based                                                | 14    |

\*Give information separately for cases and controls in case-control studies and, if applicable, for exposed and unexposed groups in cohort and cross-sectional studies.

**Note:** An Explanation and Elaboration article discusses each checklist item and gives methodological background and published examples of transparent reporting. The STROBE checklist is best used in conjunction with this article (freely available on the Web sites of PLoS Medicine at <http://www.plosmedicine.org/>, Annals of Internal Medicine at <http://www.annals.org/>, and Epidemiology at <http://www.epidem.com/>). Information on the STROBE Initiative is available at [www.strobe-statement.org](http://www.strobe-statement.org).



# BMJ Open

## Why women die after reaching the hospital: a qualitative critical incident analysis of the “third delay” in post-conflict northern Uganda.

|                                 |                                                                                                                                                                                                                                                                                                                                                                                                                                                                                                                                                                                              |
|---------------------------------|----------------------------------------------------------------------------------------------------------------------------------------------------------------------------------------------------------------------------------------------------------------------------------------------------------------------------------------------------------------------------------------------------------------------------------------------------------------------------------------------------------------------------------------------------------------------------------------------|
| Journal:                        | <i>BMJ Open</i>                                                                                                                                                                                                                                                                                                                                                                                                                                                                                                                                                                              |
| Manuscript ID                   | bmjopen-2020-042909.R2                                                                                                                                                                                                                                                                                                                                                                                                                                                                                                                                                                       |
| Article Type:                   | Original research                                                                                                                                                                                                                                                                                                                                                                                                                                                                                                                                                                            |
| Date Submitted by the Author:   | 18-Feb-2021                                                                                                                                                                                                                                                                                                                                                                                                                                                                                                                                                                                  |
| Complete List of Authors:       | Alobo, Gasthony; Lira University, Obstetrics and Gynecology; St. Mary's Hospital Lacor, Obstetrics and Gynecology<br>Ochola, Emmanuel; St. Mary's Hiospital Lacor, Public Health; Gulu University Faculty of Medicine, Public Health<br>Bayo, Pontius; Torit State Hospital , Obstetrics and Gynecology<br>Muhereza, Alex; RHITES - North Acholi, Maternal and Newborn Care<br>Nahurira, Violah; Lacor Hospital, Obstetrics and Gynecology<br>Byamugisha , Josaphat; Makerere University, Department of Obstetrics and Gynecology ; Mulago National Referral Hospital, OBSTETRICS GYNECOLOGY |
| <b>Primary Subject Heading</b>: | Obstetrics and gynaecology                                                                                                                                                                                                                                                                                                                                                                                                                                                                                                                                                                   |
| Secondary Subject Heading:      | Public health, Obstetrics and gynaecology, Qualitative research                                                                                                                                                                                                                                                                                                                                                                                                                                                                                                                              |
| Keywords:                       | GYNAECOLOGY, Maternal medicine < OBSTETRICS, PUBLIC HEALTH                                                                                                                                                                                                                                                                                                                                                                                                                                                                                                                                   |
|                                 |                                                                                                                                                                                                                                                                                                                                                                                                                                                                                                                                                                                              |

SCHOLARONE™  
Manuscripts



I, the Submitting Author has the right to grant and does grant on behalf of all authors of the Work (as defined in the below author licence), an exclusive licence and/or a non-exclusive licence for contributions from authors who are: i) UK Crown employees; ii) where BMJ has agreed a CC-BY licence shall apply, and/or iii) in accordance with the terms applicable for US Federal Government officers or employees acting as part of their official duties; on a worldwide, perpetual, irrevocable, royalty-free basis to BMJ Publishing Group Ltd ("BMJ") its licensees and where the relevant Journal is co-owned by BMJ to the co-owners of the Journal, to publish the Work in this journal and any other BMJ products and to exploit all rights, as set out in our [licence](#).

The Submitting Author accepts and understands that any supply made under these terms is made by BMJ to the Submitting Author unless you are acting as an employee on behalf of your employer or a postgraduate student of an affiliated institution which is paying any applicable article publishing charge ("APC") for Open Access articles. Where the Submitting Author wishes to make the Work available on an Open Access basis (and intends to pay the relevant APC), the terms of reuse of such Open Access shall be governed by a Creative Commons licence – details of these licences and which [Creative Commons](#) licence will apply to this Work are set out in our licence referred to above.

Other than as permitted in any relevant BMJ Author's Self Archiving Policies, I confirm this Work has not been accepted for publication elsewhere, is not being considered for publication elsewhere and does not duplicate material already published. I confirm all authors consent to publication of this Work and authorise the granting of this licence.

# Why women die after reaching the hospital: a qualitative critical incident analysis of the "third delay" in post-conflict northern Uganda.

## Authors:

Gasthony Alobo<sup>1,2</sup>, Emmanuel Ochola<sup>3</sup>, Pontius Bayo<sup>4</sup>, Alex Muhereza<sup>5</sup>, Violah Nahurira<sup>1</sup>, Josaphat Byamugisha<sup>6</sup>

## Authors' affiliations:

<sup>1</sup>Department of Obstetrics and Gynaecology, Lacor Hospital, Gulu, Uganda.

<sup>2</sup>Department of Obstetrics and Gynaecology, Lira University, Lira, Uganda.

<sup>3</sup>Department of Clinical Epidemiology and Public Health, Lacor Hospital, Gulu, Uganda.

<sup>4</sup>Department of Obstetrics and Gynaecology, Torit State Hospital, Torit, South Sudan.

<sup>5</sup>Department of Maternal and Newborn Care, RHITES-North Acholi, Gulu, Uganda.

<sup>6</sup>Department of Obstetrics and Gynaecology, Makerere University College of Health Sciences, Kampala

## Corresponding author:

Gasthony Alobo, Lira University, BOX 1035, Lira, Uganda; email: [gasthonya@gmail.com](mailto:gasthonya@gmail.com)

## Abstract

**Objective:** To critically explore and describe the pathways that women who require emergency obstetrics and newborn care (EmONC) go through, and to understand the delays in accessing EmONC after reaching a health facility in a conflict-affected setting.

**Design:** This was a qualitative study with two units of analysis: (1) Critical Incident Technique (CIT) (2) Key informant (KI) interviews with health workers, patients, and attendants.

**Setting:** Thirteen Primary Health Care Centres (PHCCs), one general private-not-for-profit hospital, one Regional Referral Hospital (RRH), and one teaching hospital in northern Uganda.

**Participants:** Forty-nine purposively selected health workers, patients, and attendants participated in KI interviews (KII). CIT mapped pathways for maternal deaths and near-misses selected based on critical case purposive sampling.

**Results:** After reaching the health facility, a pregnant woman goes through a complex pathway that leads to delays to receive EmONC. Five reasons were identified for these delays: a shortage of medicines and supplies, lack of blood and functionality of the operating theatres, gaps in staff coverage, gaps in staff skills, and delays in the inter-facility referral system. Shortage of medicines and supplies was central in most of the pathways characterised by three patterns: delay to treat, back-and-forth movements to buy medicines or supplies, and multiple referrals across facilities. Some women also by-passed facilities they deemed to be non-functional.

**Conclusion:** Our findings show that the pathway to EmONC is precarious and takes too long even after making early contact with the health facility. The need to skill and manage better the meagre human resource, and to avail essential medical supplies in health facilities may help to reduce the gaps in a facility's emergency readiness and thus improve maternal and neonatal outcomes.

**Keywords:** Maternal Death, Maternal Near Miss, Third Delay, EmONC, Critical Incident Technique, Northern Uganda.

**Word count: 3987**

## Article summary

### Strengths and limitations of this study:

- This qualitative study utilized two methods of data collection for diagrammatic and thematic analyses, CIT and KII. These are complementary and yield richer data for realist enquiry.
- CIT comprehensively mapped pathways typically followed by cases of maternal deaths and maternal near-misses in similar settings based on critical case purposive sampling.
- There were limitations to this study:
  - we conducted all the interviews within the health facilities which might have influenced some responses.
  - Part of this study focused on the referral system, but the addition of two tertiary facilities in Lira without additional step-down health centres might be a limitation to saturation of data and might not fully present the PHCC experience.
  - Critical case sampling could be biased by the researchers' selection interests. However, the researchers used independent maternal and perinatal death surveillance and response (MPDSR) teams at the tertiary hospitals to identify the cases based on the principles of analytical generalisation.

## Background:

Globally, maternal mortality is still unacceptably high. By 2017, about 295,000 women were still dying every year [1]. More than half of the global maternal mortality occurs in Sub-Saharan Africa, and about a third in South Asia [1, 2]. These regions include fragile, humanitarian, and post-conflict areas [3].

In Uganda, maternal mortality ratio declined modestly between 2011 and 2016 from 438 to 336, but with regional differences due to variations in social determinants of health [4, 5]. For example, northern Uganda is a post-conflict area and currently host to refugees from South Sudan; these circumstances have exacerbated food insecurity and constrained resources for health with possible suboptimal maternal healthcare in the region [6, 7]. The leading causes of maternal death are direct obstetric causes and include haemorrhage, infection, hypertensive disorders, uterine rupture, and abortion complications [8, 9]. Malaria and HIV/AIDS contribute significantly to the indirect causes of maternal deaths in Uganda [10].

Several delays also exist along the pathway to care. The “three delays” model has been widely used to understand the factors that underlie maternal deaths [11]. The first delay is a delay in deciding to seek clinical care during an obstetric emergency, the second delay is a delay in reaching the health facility, and the third delay is a delay in receiving appropriate care while at the health facility.

Compared to the first and second delays, the third delay has been under-documented and under-researched with only a few in-depth and critical analyses of the pathways followed by women with obstetric complications [12, 13]. Moreover, the met need for emergency obstetrics and newborn care (EmONC) in some post-conflict regions, and in Low and Middle Income Countries (LMICs) generally, is still very low [14-17]. In the context of Uganda, a low-income country which is conflict-affected with fragile health and referral systems, it is possible to hypothesize significant delays in receiving EmONC even after arriving at a health facility. Such delays could lead to poor maternal and newborn outcomes. Therefore, the purpose of this study was to (1) explore and describe the pathways that women who require EmONC go through after deciding to seek care; (2) understand the delays in accessing EmONC after reaching a health facility.

## Methods:

### Study design

This qualitative study utilised an embedded study design with two units of analysis: (1) Critical Incident analysis of maternal deaths (MD) and maternal near misses (MNM), (2) Key-informant interviews (KII) with persons who were perceived to know about the maternal health care by their roles as health workers or experience with the health system. The critical incident technique (CIT) was first described by Flanagan in 1954 as a way of collecting specific and significant behavioural facts thus giving a solid basis for making inferences [18]. It has been used as a qualitative methodology in health systems research, that is useful for exploring barriers to quality care or to achieving satisfaction with care provision [19]. It involves the analysis of specific incidents to determine what actions or behaviors could '*lead to the best possible outcome of a given situation*' [20]. The use of CIT complements KII by drawing on more specific experiences thereby eliciting richer data for realist enquiry [21].

### Study setting and population

Northern Uganda has an estimated population of 7.1 million, and a total fertility rate of 5.4 children per woman [5]. The first part of this study was carried out in northern Uganda to explore the pathway to care for mothers accessing EmONC services through the referral system to Lacor Hospital. The hospital is located in Gulu district in the post-conflict Acholi sub-region, west of northern Uganda. It provides comprehensive EmONC (CEmONC) services and also serves as a referral site for the greater northern Uganda. It has three satellite level 3 health centres within an average distance of 60 kilometers - Pabbo, Opit, and Amuru that offer basic EmONC (BEmONC) services. The main means of transport is the motorcycle because of poor road networks. A second part of the study was carried out at Lira Regional Referral Hospital and Lira University Teaching Hospital in the Lango sub-region, east of northern Uganda. The addition of these two tertiary facilities aimed to increase the number of participants to achieve saturation. The population used in the CIT and KII included: patients' relatives and attendants, facility-based KIs, and the patients themselves for MNM.

## Sampling and participants

### *Key-informants*

We used a purposive sampling technique to identify and recruit the first few KIs who were healthcare workers as well as unit in-charges and attendants with knowledge of the critical incidents or members of the maternal and perinatal death surveillance and response (MPDSR) teams at Lacor Hospital, Lira Regional Referral Hospital, and Lira University Teaching Hospital. This was followed by a snowball technique to identify further KIs including ambulance drivers, midwives, patients, and relatives who also participated in care during the critical incidents. During data collection, we also identified other KIs in the above categories who accepted to participate in this study. A total of forty-nine KIs took part in this study (Table 1).

### *Critical incidents*

We used critical case purposive sampling to identify the cases. We restricted ourselves to maternal death and maternal near miss as critical incidents. Critical case sampling has been described as “a method where selected important or critical cases are examined based on the following: ‘If it happens there, will it happen anywhere?’ or ‘if that group is having problems, then can we be sure all the groups are having problems?’” [22]. The MPDSR teams of the hospitals identified a total of fifty cases that had complete records and met the criteria for critical case purposive sampling. To enhance the transferability of the findings, we only included eight MDs and fifteen MNMs that went through the referral system in more than two facilities, except for the Lango sub-region.

Table 1 Key-informants interviewed

| Category          | Acholi sub-region | Lango sub-region | Total |
|-------------------|-------------------|------------------|-------|
| Doctors           | 3                 | 2                | 5     |
| Midwives          | 6                 | 3                | 9     |
| Ambulance drivers | 2                 | 1                | 3     |
| Patients          | 9                 | 6                | 15    |
| Attendants        | 11                | 6                | 17    |



## Data collection

We conducted interviews after an initial process of informed consent from all the participants which was verbal because the study presented no more than minimal risk or harm and, in the case of family members, to minimise the intrusiveness of the process at a time of grieving. The interviews and mapping of the pathways were conducted from November 2017 to December 2019 in the Acholi sub-region. Additional mapping of pathways for cases and interviews at the two tertiary hospitals in the Lango sub-region were done in June 2020. The interviews were scheduled at a time agreed upon with each interviewee, and all took place at the hospitals and within two weeks of the occurrence of the MD and MNM to avoid a potential loss to follow-up and recall bias. For the CIT, each interview began with self-introduction since some participants were not known to the interviewers followed by the collection of the demographic and family background information. In all the cases, semi-structured interviews were carried out in Luo for the patients and their relatives or attendants and in English for the health workers. For each case, we conducted group or individual interviews, as chosen by the participants. The former case involved one respondent narrating the entire series of events surrounding a critical incident, followed by a further inquiry or additional contribution from the members. The four guiding questions were: ‘when did (name of the woman) start having labour pains or feeling unwell?’ ‘where did she go to?’ ‘how did she reach there and how long did she take?’ ‘what happened on arrival at the facility?’ However, the interviewers allowed participants to express themselves freely, audio-recorded or took systematic notes (with the verbal permission of the respondent), and where possible, sketched a diagrammatic pathway for each case. Additional questions were also asked regarding (antenatal care) ANC attendance, risk factors. For the facility in-charges, we asked questions related to quality and accessibility to EmONC services in northern Uganda. Before concluding each interview, the interviewers revisited the diagrammatic pathways to clarify any remaining uncertainties or gaps and member checking where necessary. All the interviews were concluded by asking the interviewees for recommendations to improve EmONC services with a focus on reducing the third delay then thanking the participants (Supplementary file).

## Data analysis

All the interviews were transcribed and translated into English. The transcripts were read through several times to identify the major themes and become familiar with the content. The pathways to care were mapped for each case from onset of labour pains or danger signs to discharge whether

1  
2  
3 alive or dead, with a major focus on the time while at the health facilities. This mapping helped to  
4 identify key events like decisions and decision-makers, transport means, points of referrals,  
5 timeframes, and geographical locations of these critical cases. A critical incident report that merged  
6 data from CIT and KII was then developed, followed by mapping of the pathway for each case. To  
7 add to its rigor, this pathway-analysis was also looked at by other members of the team. We  
8 completed the mapping of the incidents by hand and Excel Shapes once the team members agreed on  
9 its accuracy. A thematic inductive analysis was used for the KII. We followed the six steps of  
10 thematic analysis: familiarisation, coding, generating themes, reviewing themes, defining and  
11 naming themes, then writing up [23]. NVivo 10 software was used to manage the data.  
12  
13  
14  
15  
16  
17  
18

### 19 **Patient and Public Involvement:**

20  
21 The concept and design of this research were informed by experiences shared by patients and care-  
22 takers during routine care for childbirth. We have shared the results, especially critical incidents,  
23 with the district and national stakeholders.  
24  
25  
26

### 27 **Ethical consideration**

28  
29 This study was approved by the Lacor Hospital Institutional Research Ethics Committee  
30 (LHIREC) and the Uganda National Council for Science and Technology, within the Mother and  
31 Child Health Lacor and South Sudan (MoChELaSS) project. We obtained verbal consent from all  
32 the participants and this was specially approved by LHIREC since the study had no more than  
33 minimal risk or harm. The interviewers took into consideration the sensitive issues that surround  
34 deaths in most cultures of northern Uganda. Whenever the interviewees showed any sign of  
35 emotional distress, the interviews were adjourned.  
36  
37  
38  
39  
40  
41  
42  
43  
44  
45  
46  
47  
48  
49  
50  
51  
52  
53  
54  
55  
56  
57  
58  
59  
60

## Results:

After analysing the pathways from the CIT and data from the KII, we found that a pregnant woman goes through a complex pathway that leads to delays to receive care while at the health facility sometimes with sub-optimal outcomes. Underlying these delays were a shortage of medicines and supplies, lack of blood, gaps in staff coverage and skills in managing obstetric emergencies, and barriers in the referral system as summarised in Figure 1. The CIT elucidated similar pathways of maternal mortality in all the selected cases: delay to treat, back-and-forth movements to buy medicines or supplies, and referral across multiple facilities that were deemed non-functional. Some women bypassed facilities they perceived to be non-functional or sought care from traditional birth attendants (TBAs) and religious leaders.

### Shortage of medicines and supplies

A midwife reported that patients sometimes buy emergency medicines like oxytocin and magnesium sulphate as they wait for the next delivery of medicines and supplies from the national medical store. Some KIs cited a severe shortage of supplies like gloves, fluid giving sets, urinary catheters, and intravenous cannulas as some of the reasons for the delay to receive EmONC services. As a result, a lot of time is wasted trying to raise money to buy these supplies.

*“She was in labour for two days at the health centre. When we reached the regional referral hospital, they told us to buy gloves and a tube for urine. The husband ran home to borrow money. When he came back the doctor told us that the womb had ruptured and that we use that money to go to Lacor Hospital. It's bad, she died” (mother-in-law of an MD case, Lacor Hospital)*

Lack of antihypertensives and anticonvulsants was a common problem in BEmONC facilities while CEmONC facilities lack anaesthetic drugs and spinal needles. For example, Figure 2 illustrates a delay to receive emergency medications for hypertensive disorders and by-passing facilities with non-functional operating theatres.

Depending on the geographical location, the nearest health facility where a woman in the village could get EmONC is a PHCC health centre (H/C) II or III serviced by a midwife and clinical officer. However, most of the PHCCs in the region are not fully functional because of frequent stock-outs of

1  
2  
3 EmONC signal function drugs. As a result, the EmONC services are mainly offered by the tertiary  
4 level facilities that include the RRHs and NRH.

5  
6  
7 *"We are now receiving very many referrals from the lower H/Cs due to lack of oxytocin and*  
8 *intravenous fluids. It's now two months since the drugs were delivered to those facilities"* (Midwife,  
9 *Lira RRH*).  
10  
11

12  
13 According to some patients and their relatives, health facilities in the urban areas are mainly  
14 privately owned and often do not experience stock-outs of medicines, but they are too costly for the  
15 poor population. The slum-dwellers, who are largely poor, are served by the public RRHs. The  
16 typical pathways of MDs and MNMs that we observed for MDs from urban areas are not different  
17 from the remote areas, mainly due to lack of tracer medicines and medical supplies.  
18  
19

20  
21  
22 *"It's true, sometimes we get bad outcomes of the mother or baby because of drug stock-outs.*  
23 *Remember these are very poor women from the slums. What do you do if a mother can not buy*  
24 *medicines from the private pharmacies in times of stock-out and yet she is actively bleeding?"*  
25 *(Midwife, Lira RRH)*  
26  
27  
28

### 29 **Lack of blood and functionality of the operating theatres**

30  
31  
32 According to the Uganda's health system policies, all level 4 health centres and hospitals are supposed  
33 to offer CEmONC. This requires that they have facilities to perform emergency caesarean sections  
34 and blood transfusion. The stakeholders that we interviewed reported that these facilities are not fully  
35 functional in some areas. Some health workers and attendants reported blood shortage being worse  
36 during holidays since students comprise the largest number of donors. Some patients and attendants  
37 reported waiting for blood or being referred to another health facility during times of blood-scarcity.  
38  
39

40  
41  
42 *"We reached at 8.00 pm but had to wait for 4 hours for blood. There was only one unit from the blood*  
43 *bank, yet they needed four units so that the operation could be done. She was bleeding too much and*  
44 *died on the way here."* (Husband of an MD case, Lacor Hospital)  
45  
46  
47  
48

49 As illustrated in Figure 3, lack of blood was noted across all levels of facilities including Lacor hospital  
50 and other tertiary hospitals.  
51  
52  
53  
54  
55  
56  
57  
58  
59  
60

1  
2  
3 By design, all the H/C IVs have operating theatres but some are not fully functional. Lack of  
4 anaesthetists, spinal anaesthesia drugs, and needles was cited as reasons for the non-functionality of  
5 the operating theatres as illustrated by a case in Figure 4.  
6  
7

8  
9 *"We get so many referrals from H/C IVs for emergency Caesarean section; of course with bad*  
10 *outcomes quite often. At least for us here patients can buy some drugs from the pharmacies in case of*  
11 *stock-outs, which is not the case in the villages where the H/C IVs are"* (Midwife, Lira University  
12 *Teaching Hospital)*  
13  
14  
15

### 16 **Gaps in staff coverage**

17  
18 Gaps in staff coverage were referred to as a "chronic" problem across all public health facilities by  
19 most non-facility based KIs. For most of the lower H/Cs, the KIs reported that the only available  
20 midwife in each facility is often away for training and workshops leaving only nursing assistants  
21 who largely lack midwifery training. In most CEMONC facilities, the doctors and anaesthetists are  
22 sometimes not available on weekends or public holidays. The stakeholders attributed this to lack of  
23 supervision by the facility in-charges and the district health officers.  
24  
25  
26  
27  
28  
29

30  
31 *"There is no H/C IV that is fully functional. Well, the structures are there but the personnel are not*  
32 *available full time especially on weekends and at night. For example, doctors. It's not easy to find*  
33 *them full time at work. I was told to wait until Monday... Imagine, I would be dead now"* (MNM  
34 *case, Lira RRH)*  
35  
36  
37  
38  
39

40 In the analysis of the pathways, skilled personnel are critical in executing timely interventions to treat  
41 or refer. Figure 5 illustrates a delay to treat and refer. Some facilities often close their maternity units  
42 when the midwives are not available making patients seek alternative care from the TBAs and religious  
43 leaders (Figure 6 and Figure 7)  
44  
45  
46

### 47 **Skills of the staff**

48  
49 Skilled birth attendants are necessary for early identification and management of obstetric  
50 complications as indicated by facility in-charges. Many patients and their attendants reported that  
51 midwives take too long to intervene, including referral to a higher facility when needed. Some  
52 women reported that they had to demand referrals, but ended up with bad outcomes.  
53  
54  
55  
56  
57  
58  
59  
60

1  
2  
3  
4  
5 *“Last week, I laboured for four days at the health facility. I told the midwife that this is not how my*  
6 *labour has always been [...]. She said that I was pretending and that everything was fine because*  
7 *some labours take long like that.... I had a sharp pain then started bleeding seriously, she then told*  
8 *us to go to the main hospital. ... my womb was torn already and they removed it. I thank God that*  
9 *I’m still alive.” (MNM case, Lacor Hospital)*

10  
11  
12  
13  
14  
15 During the KI interviews, some stakeholders pointed out training gaps among doctors and midwives.  
16 As a result, the health workers have knowledge and skill gaps and often take long to intervene;  
17 causing unnecessary delays.  
18  
19

20  
21  
22 *“... the midwives and doctors of these days are ‘half baked.’ They are very slow and take long to*  
23 *decide. They can’t handle emergencies because you have to act fast” (Midwife, Lacor Hospital).*

24  
25  
26  
27 A critical training gap was reported in some privately-owned midwifery schools that lack teaching  
28 hospitals. A midwife supervisor also cited a lack of internship for certificate and diploma midwives.  
29 Figure 8 illustrates a possible gap in skills where a midwife kept a mother in active labour for three  
30 days.  
31  
32  
33

### 34 35 36 **Delays in the referral system**

37  
38 There were reports of inter-facility delays due to the unfavourable state of the roads. According to  
39 the ambulance drivers, most roads that link the BEmONC facilities to CEmONC facilities are almost  
40 impassable, especially during rainy seasons. The roads usually flood when it rains heavily. This  
41 leads to a delay during the referral process.  
42  
43  
44

45  
46 *“I’ve not gone to many places to see how bad the roads are. But when it rains, the roads are*  
47 *impassable. We usually delay so much on the road and if it is a bad emergency, the mother can even*  
48 *lose the baby” (Ambulance driver, Lacor Hospital)*

49  
50  
51  
52  
53 Many midwives were also concerned about delays to access ambulances. They attributed this to the  
54 centralised ambulance system. For the case of Lacor hospital and its satellite H/Cs, the ambulance  
55  
56  
57  
58  
59

1  
2  
3 system is designed in such a way that they are stationed at the main hospital. In case of any  
4 emergency at the lower H/Cs, the ambulance is called from the main hospital, which is on average  
5 70 km away. There is usually some delay owing to the bad roads in the remote areas where these  
6 H/Cs are located.  
7  
8  
9

10  
11  
12 *“For quality and quick response, we are not yet a hundred percent, because you can imagine a*  
13 *mother with cord prolapse is in Amuru, 75 kilometers away, then they discover, they have to call*  
14 *here [Lacor Hospital]. So, there are delays sometimes. Some emergencies don't need any delay at*  
15 *all.” (Midwife, Lacor Hospital)*  
16  
17  
18

19  
20 The system for government facilities is not any different. The ambulances are stationed at the  
21 regional referral and district hospitals, but they have inadequate fuel most times.  
22  
23

24  
25  
26 *“For us, we have to call the district hospital for the ambulance. But you have to wait until the*  
27 *attendants get money for fuel” (Midwife from H/C III, who escorted a d mother referred to Lira*  
28 *RRH)*  
29  
30

31  
32 It was reported that some patients are so poor and can spend the whole day trying to raise money for  
33 fuel. In some cases, they have to first go back home and sell land or animals.  
34  
35  
36

### 37 38 **Zigzagging referrals**

39  
40 In one of the pathways, we also noted a back and forth referral pattern. As illustrated in Figure 9,  
41 each facility refers to the other in a zigzagging manner after failing to carry out a diagnostic test or  
42 an operation.  
43  
44  
45  
46  
47  
48  
49  
50  
51  
52  
53  
54  
55  
56  
57  
58  
59  
60

## Discussion:

Although maternal deaths and near-misses have been largely studied with a major focus on biological causes of death, this study elucidated some intriguing reasons why mothers die even after making early contact with formal healthcare. In the pathways that we analysed, all the women took much longer than the common threshold while at the health facilities and developed complications. This is consistent with the definition of the duration of the third delay by Edson et al [24]. The pathways to maternal mortality are highly influenced by a shortage of medicines and supplies necessary for signal functions of EmONC. Typically, patients and attendants are “shuffled around” to buy medicines and supplies; causing significant delays similar to findings from other LMICs [25, 26]. Because most lower facilities lack medicines and supplies, some women had to trek across districts to access BEmONC services. This is contrary to the WHO recommendation of accessibility within 5 kilometres [27].

As illustrated in the various pathways in this study, women who require CEmONC services often face significant challenges. Similar to most LMICs, lack of blood and blood products, gaps in coverage by doctors and anaesthetists, and power outages were major hindrances to accessing emergency operations [28, 29]. Even in cases where emergency caesarean sections were done, it took longer than the thirty-minute to the one-hour interval of the decision to operation as stipulated in some guidelines [30, 31].

The pathways described in this study show that women experience significant “passive delays” due to limited practical capacity to identify and treat obstetric emergencies even in facilities with a fair stock of EmONC tracer drugs. Similarly, a study done in Kenya found that the availability of signal functions alone does not directly translate into a readiness to manage obstetric emergencies, but rather a clinical cascade that involves the ability to identify the emergency, treat it, and monitor-modify therapy [32]. Women who were first assessed by personnel with suboptimal midwifery skills like general nurses, nursing assistants, and TBAs were likely to die in most of the pathways. Some studies have found that these women receive wrong medicines, are not monitored, and are often referred late [33, 34].

Evidence from LMICs shows that most BEmONC facilities refer between 60-80% of their patients to CEmONC facilities [35-37]. A good referral system is therefore very important for good maternal and neonatal outcomes [38, 39]. Similar to a study by Elmusharaf *et al* 2017, our study elucidated



1  
2  
3 four patterns of delays in the inter-facility referrals: delay in deciding to refer, referral through  
4 multiple non-functioning CEmONC facilities, back-and-forth referrals, and by-passing CEmONC  
5 facilities that are deemed non-functional [40]. The major point of delay in the referral system was  
6 the first point of care and often related to the capacity to identify complications promptly as  
7 highlighted in some studies [40, 41].  
8  
9

10  
11  
12 This study had some limitations that warrant cautious generalisation of the findings. We carried out  
13 all the interviews at the health facilities and this may pose response bias. However, we compared  
14 responses from respondents along similar pathways to eliminate gross response bias. Secondly, part  
15 of this study focused on the referral system, and the addition of two tertiary facilities in Lira without  
16 additional step-down health centres might be a limitation to saturation of data and might not fully  
17 present the PHCC experience. Additionally, critical case sampling could be biased by the  
18 researchers' selection interests. However, the researchers used independent MPDSR teams at the  
19 tertiary hospitals to identify the cases based on the principles of analytical generalisation. Overall,  
20 the concept and understanding used in this study are transferable.  
21  
22  
23  
24  
25  
26  
27  
28  
29  
30

### 31 **Conclusion:**

32  
33 This study elucidated pathways typically characterised by delays at the health facilities. These  
34 pathways provide a novel framework to assess, track and improve the health facility's practical  
35 readiness to identify and treat obstetric emergencies. For example, health workers can work with  
36 mothers during the antenatal period to identify suitable blood donors and include this on the  
37 antenatal chart or engage with Uganda Midwives and Nurses Council to address gaps in midwifery  
38 training like access to teaching hospitals and internship opportunities. The pathways also provide a  
39 qualitative, critical approach to clearly describe the third delay.  
40  
41  
42  
43  
44  
45  
46  
47  
48  
49  
50  
51  
52  
53  
54  
55  
56  
57  
58  
59  
60

**Availability of data and materials:**

The materials presented here can be got from the corresponding author upon reasonable request.

**Conflict of interest:**

The authors declare no conflict of interest.

**Funding:**

This research was carried out as part of the MoChELaSS project. The project only supported ethical clearance. Otherwise, the study received no specific grant from any funding agency in the public, commercial or not-for-profit sectors.

**Acknowledgements:**

The authors particularly acknowledge Audrey-Jade Paris-Migneault and Loubna Belaid for their work on using CIT to explore women's pathways to urgent obstetric care in Gulu, which has strongly informed the examination of the third delay presented in this current manuscript. We are also grateful to the patients and all the key-informants for accepting to be interviewed. We thank Dr. Oneka Francis and Okot Solomon Nono for editing images to meet the standards, and Prof. Christina Zarowsky for proofreading the manuscript.

**Author contributions:**

GA, AM, and EO conceived the idea and wrote the design. VN and GA collected data. GA and EO carried out data analysis and writing the manuscript. GA, PB, and JB did the overall review and editing. All authors read and approved the final manuscript.

## References:

1. Organization, W.H., *Trends in maternal mortality 2000 to 2017: estimates by WHO, UNICEF, UNFPA, World Bank Group and the United Nations Population Division*. 2019.
2. Alkema, L., et al., *Global, regional, and national levels and trends in maternal mortality between 1990 and 2015, with scenario-based projections to 2030: a systematic analysis by the UN Maternal Mortality Estimation Inter-Agency Group*. *The Lancet*, 2016. **387**(10017): p. 462-474.
3. Murray, C.J., et al., *Armed conflict as a public health problem*. *BMJ*, 2002. **324**(7333): p. 346-349.
4. UDHS, I., *Uganda demographic and health survey*. Uganda Bureau of Statistics, Kampala Uganda, 2011.
5. Uganda Bureau of Statistics (UBOS) and ICF, *Uganda Demographic and Health Survey 2016: Key Indicators Report*. 2017, UBOS and Rockville: Kampala, Uganda, and Maryland, USA.
6. Liebling, H., H. Barrett, and L. Artz, *South Sudanese refugee survivors of sexual and gender-based violence and torture: health and justice service responses in northern Uganda*. *International journal of environmental research and public health*, 2020. **17**(5): p. 1685.
7. Chi, P.C., et al., *Perceptions of the effects of armed conflict on maternal and reproductive health services and outcomes in Burundi and Northern Uganda: a qualitative study*. *BMC international health and human rights*, 2015. **15**(1): p. 7.
8. Ngonzi, J., et al., *Puerperal sepsis, the leading cause of maternal deaths at a Tertiary University Teaching Hospital in Uganda*. *BMC pregnancy and childbirth*, 2016. **16**(1): p. 207.
9. Mukasa, P.K., et al., *Uterine rupture in a teaching hospital in Mbarara, western Uganda, unmatched case-control study*. *Reproductive health*, 2013. **10**(1): p. 29.
10. Zaba, B., et al., *HIV and mortality of mothers and children: evidence from cohort studies in Uganda, Tanzania, and Malawi*. *Epidemiology*, 2005: p. 275-280.
11. Thaddeus, S. and D. Maine, *Too far to walk: maternal mortality in context*. *Social science & medicine*, 1994. **38**(8): p. 1091-1110.
12. Goodman, D.M., et al., *The third delay: understanding waiting time for obstetric referrals at a large regional hospital in Ghana*. *BMC pregnancy and childbirth*, 2017. **17**(1): p. 216.
13. Knight, H.E., A. Self, and S.H. Kennedy, *Why are women dying when they reach hospital on time? A systematic review of the 'third delay'*. *PloS one*, 2013. **8**(5).
14. Bayo, P., et al., *Estimating the met need for emergency obstetric care (EmOC) services in three payams of Torit County, South Sudan: a facility-based, retrospective cross-sectional study*. *BMJ open*, 2018. **8**(2): p. e018739.
15. Holmer, H., et al., *The global met need for emergency obstetric care: a systematic review*. *BJOG: An International Journal of Obstetrics & Gynaecology*, 2015. **122**(2): p. 183-189.
16. Admasu, K., A. Haile-Mariam, and P. Bailey, *Indicators for availability, utilization, and quality of emergency obstetric care in Ethiopia, 2008*. *International Journal of Gynecology & Obstetrics*, 2011. **115**(1): p. 101-105.
17. Ameh, C., et al., *Status of emergency obstetric care in six developing countries five years before the MDG targets for maternal and newborn health*. *PloS one*, 2012. **7**(12).
18. Flanagan, J.C., *The critical incident technique*. *Psychological Bulletin*, 1954. **51**(4): p. 327.
19. Viergever, R.F., *The critical incident technique: method or methodology?* *Qualitative health research*, 2019. **29**(7): p. 1065-1079.
20. Kempainen, J.K., *The critical incident technique and nursing care quality research*. *Journal of advanced nursing*, 2000. **32**(5): p. 1264-1271.
21. Cunningham, U., A. De Brún, and E. McAuliffe, *Application of the critical incident technique in refining a realist initial programme theory*. *BMC Medical Research Methodology*, 2020. **20**: p. 1-16.

22. Etikan, I., S.A. Musa, and R.S. Alkassim, *Comparison of convenience sampling and purposive sampling*. American journal of theoretical and applied statistics, 2016. **5**(1): p. 1-4.
23. Clarke, V., V. Braun, and N. Hayfield, *Thematic analysis*. Qualitative psychology: A practical guide to research methods, 2015: p. 222-248.
24. Edson, W., et al., *Safe motherhood studies-timeliness of in-hospital care for treating obstetric emergencies: results from Benin, Ecuador, Jamaica, and Rwanda*. Washington: United States Agency for International Development, 2006.
25. Mgawadere, F., et al., *Factors associated with maternal mortality in Malawi: application of the three delays model*. BMC pregnancy and childbirth, 2017. **17**(1): p. 219.
26. Pacagnella, R.C., et al., *Delays in receiving obstetric care and poor maternal outcomes: results from a national multicentre cross-sectional study*. BMC pregnancy and childbirth, 2014. **14**(1): p. 159.
27. WHO, U. and UNICEF, *AMDD. Monitoring emergency obstetric care: a handbook*. Geneva: World Health Organization; 2009. 2016.
28. Ackers, L., E. Ioannou, and J. Ackers-Johnson, *The impact of delays on maternal and neonatal outcomes in Ugandan public health facilities: the role of absenteeism*. Health Policy and Planning, 2016. **31**(9): p. 1152-1161.
29. Urassa, E., et al., *Operational factors affecting maternal mortality in Tanzania*. Health policy and planning, 1997. **12**(1): p. 50-57.
30. Excellence, N.I.f.C., *Caesarean Section—NICE clinical guideline 132*. London)(<https://www.nice.org.uk/guidance/cg132> [accessed May 2016]), 2012.
31. Practice, A.C.o.O., *ACOG committee opinion No. 433: optimal goals for anesthesia care in obstetrics*. Obstetric Anesthesia Digest, 2010. **30**(2): p. 78.
32. Cranmer, J.N., et al., *Beyond signal functions in global obstetric care: Using a clinical cascade to measure emergency obstetric readiness*. PloS one, 2018. **13**(2): p. e0184252.
33. Paul, B., B. Mohapatra, and K. Kar, *Maternal deaths in a tertiary health care centre of Odisha: an in-depth study supplemented by verbal autopsy*. Indian journal of community medicine: official publication of Indian Association of Preventive & Social Medicine, 2011. **36**(3): p. 213.
34. Pacagnella, R.C., et al., *The role of delays in severe maternal morbidity and mortality: expanding the conceptual framework*. Reproductive health matters, 2012. **20**(39): p. 155-163.
35. Jahn, A., M. Kowalewski, and S.S. Kimatta, *Obstetric care in southern Tanzania: does it reach those in need?* Tropical Medicine & International Health, 1998. **3**(11): p. 926-932.
36. Nkyekyer, K., *Peripartum referrals to Korle Bu teaching hospital, Ghana—a descriptive study*. Tropical Medicine & International Health, 2000. **5**(11): p. 811-817.
37. Bailey, P.E., et al., *Referral patterns through the lens of health facility readiness to manage obstetric complications: national facility-based results from Ghana*. Reproductive health, 2019. **16**(1): p. 19.
38. Yego, F., et al., *A retrospective analysis of maternal and neonatal mortality at a teaching and referral hospital in Kenya*. Reproductive health, 2013. **10**(1): p. 13.
39. Ramaswamy, R., et al., *Transforming maternal and neonatal outcomes in tertiary hospitals in Ghana: an integrated approach for systems change*. Journal of Obstetrics and Gynaecology Canada, 2015. **37**(10): p. 905-914.
40. Elmusharaf, K., et al., *Patterns and determinants of pathways to reach comprehensive emergency obstetric and neonatal care (CEmONC) in South Sudan: qualitative diagrammatic pathway analysis*. BMC pregnancy and childbirth, 2017. **17**(1): p. 278.
41. Nuamah, G.B., et al., *Incentives to yield to obstetric referrals in deprived areas of Amansie west district in the Ashanti region, Ghana*. International journal for equity in health, 2016. **15**(1): p. 117.

1  
2  
3 **Figure legend:**  
4

5 **Figure 1** Barriers along the pathway to receive care after reaching the health facility.  
6

7  
8 **Figure 2** Delayed referral and by-passing non-functional facility. She experienced headache for two  
9 weeks at home before going to the H/C II where a diagnosis of severe pre-eclampsia was made.  
10 There were no antihypertensive and anticonvulsants. She was referred to the nearby H/C IV but after  
11 calling the midwife in-charge they were told that theatre is closed because of no anaesthetic drugs.  
12 They decided to by-pass this health centre and move to Lacor Hospital, about 90 km away. At Lacor  
13 Hospital, she received anticonvulsants and antihypertensive. She was taken to the operating room for  
14 an emergency caesarean section where a live baby was delivered. The mother was discharged alive  
15 but with a stroke. (MNM1).  
16  
17  
18  
19  
20  
21

22 **Figure 3** Lack of blood. She experienced labour pains for one day and bleeding for 4 hours before  
23 going to the Regional Referral Hospital. She had a fresh stillbirth and developed post-partum  
24 haemorrhage. The doctor requested three units of blood but there was no blood. She was referred to  
25 Lacor Hospital with severe anaemia. At Lacor Hospital there was no blood as well; she died at the  
26 admission point. (MD1).  
27  
28  
29  
30

31 **Figure 4** Multiple referrals across non-functional CEmONC facilities. She had antepartum  
32 haemorrhage (APH) and went to the H/C IV but the midwife referred her to the District Hospital for  
33 an ultrasound scan; it confirmed complete placenta praevia. A decision to do an emergency  
34 caesarean section was made but the operating room did not have electricity prompting referral to the  
35 Regional Referral Hospital (RRH). At the RRH she spent six hours looking for money to buy drugs  
36 for anaesthesia. After failing to get the money, she was verbally referred to Lacor Hospital but had  
37 bled a lot and died of haemorrhagic shock. (MD2).  
38  
39  
40  
41  
42  
43

44 **Figure 5** Delayed referral and operation. At the health centre III, there was no midwife. The nurse  
45 who attended to her did not plot a partograph and kept her for 3 days. The patient requested a referral  
46 to H/C IV where she was found to have obstructed labour but there was no doctor to do a caesarean  
47 section. She was referred to Lacor Hospital with prolonged obstructed labour and a dead foetus.  
48 Emergency caesarean section was done, taken to the intensive care unit (ICU), but got sepsis and  
49 died. (MD3).  
50  
51  
52  
53  
54  
55  
56  
57  
58  
59  
60

1  
2  
3 **Figure 6** Non-functional facility and seeking care from the TBA. She had labour pain for 3 hours  
4 then went to the TBA because the nearby H/C III had no midwife. The TBA kept her for two days  
5 until she failed to deliver. The mother was referred to the district hospital but the doctor was not  
6 available over the weekend prompting referral to Lacor Hospital. She had a ruptured uterus and died  
7 of septic shock 4 days after the operation. (MD4)  
8  
9

10  
11  
12 **Figure 7** Non-functional BEmONC facility and seeking care from the religious leader. The woman  
13 suddenly collapsed from the garden. She was taken to the H/C III and found the maternity unit  
14 closed because there was no midwife. After two episodes of convulsions, the husband gave her raw  
15 eggs and inserted a spoon in the mouth to stop her from biting the tongue. The mother-in-law  
16 advised that the woman should be taken for prayers at the pastor's place since the condition could be  
17 related to evil spirits. She spent six hours with the pastor but continued to fit. When she deteriorated,  
18 the husband rushed her to Lacor Hospital where the blood pressure was found to be very high. She  
19 was given treatment but died after 30 minutes due to eclampsia. A perimortem operation was done  
20 and extracted a live baby. (MD5).  
21  
22  
23  
24  
25  
26  
27

28 **Figure 8** Skills of the health workers. She experienced labour pain for two days before going to the  
29 health centre. The midwife received her and gave her a bed without proper assessment. After three  
30 days of active contractions and exhaustion, the attendants requested a referral to Lacor Hospital. She  
31 arrived at Lacor hospital with a ruptured uterus and was discharged with a vesicovaginal fistula.  
32 (MNM2).  
33  
34  
35  
36  
37

38 **Figure 9** Back and forth referral due to lack of diagnostics. She had an unsafe abortion then went to  
39 H/C IV. The doctor reviewed and started her on antibiotics and intravenous fluids. She was referred  
40 to the district hospital for an abdominal ultrasound scan and complete blood count. Unfortunately,  
41 these investigations could not be done. She was again referred to a private medical centre for an  
42 ultrasound scan that showed massive pus in the abdomen. The operation could not be done because  
43 there was no electricity. The family requested a referral to Lacor Hospital where the operation was  
44 done; the uterus was removed and discharged alive after 5 days. (MNM3).  
45  
46  
47  
48  
49  
50  
51  
52  
53  
54  
55  
56  
57  
58  
59  
60

1  
2  
3  
4  
5  
6  
7  
8  
9  
10  
11  
12  
13  
14  
15  
16  
17  
18  
19  
20  
21  
22  
23  
24  
25  
26  
27  
28  
29  
30  
31  
32  
33  
34  
35  
36  
37  
38  
39  
40  
41  
42  
43  
44  
45  
46  
47  
48  
49  
50  
51  
52  
53  
54  
55  
56  
57  
58  
59  
60

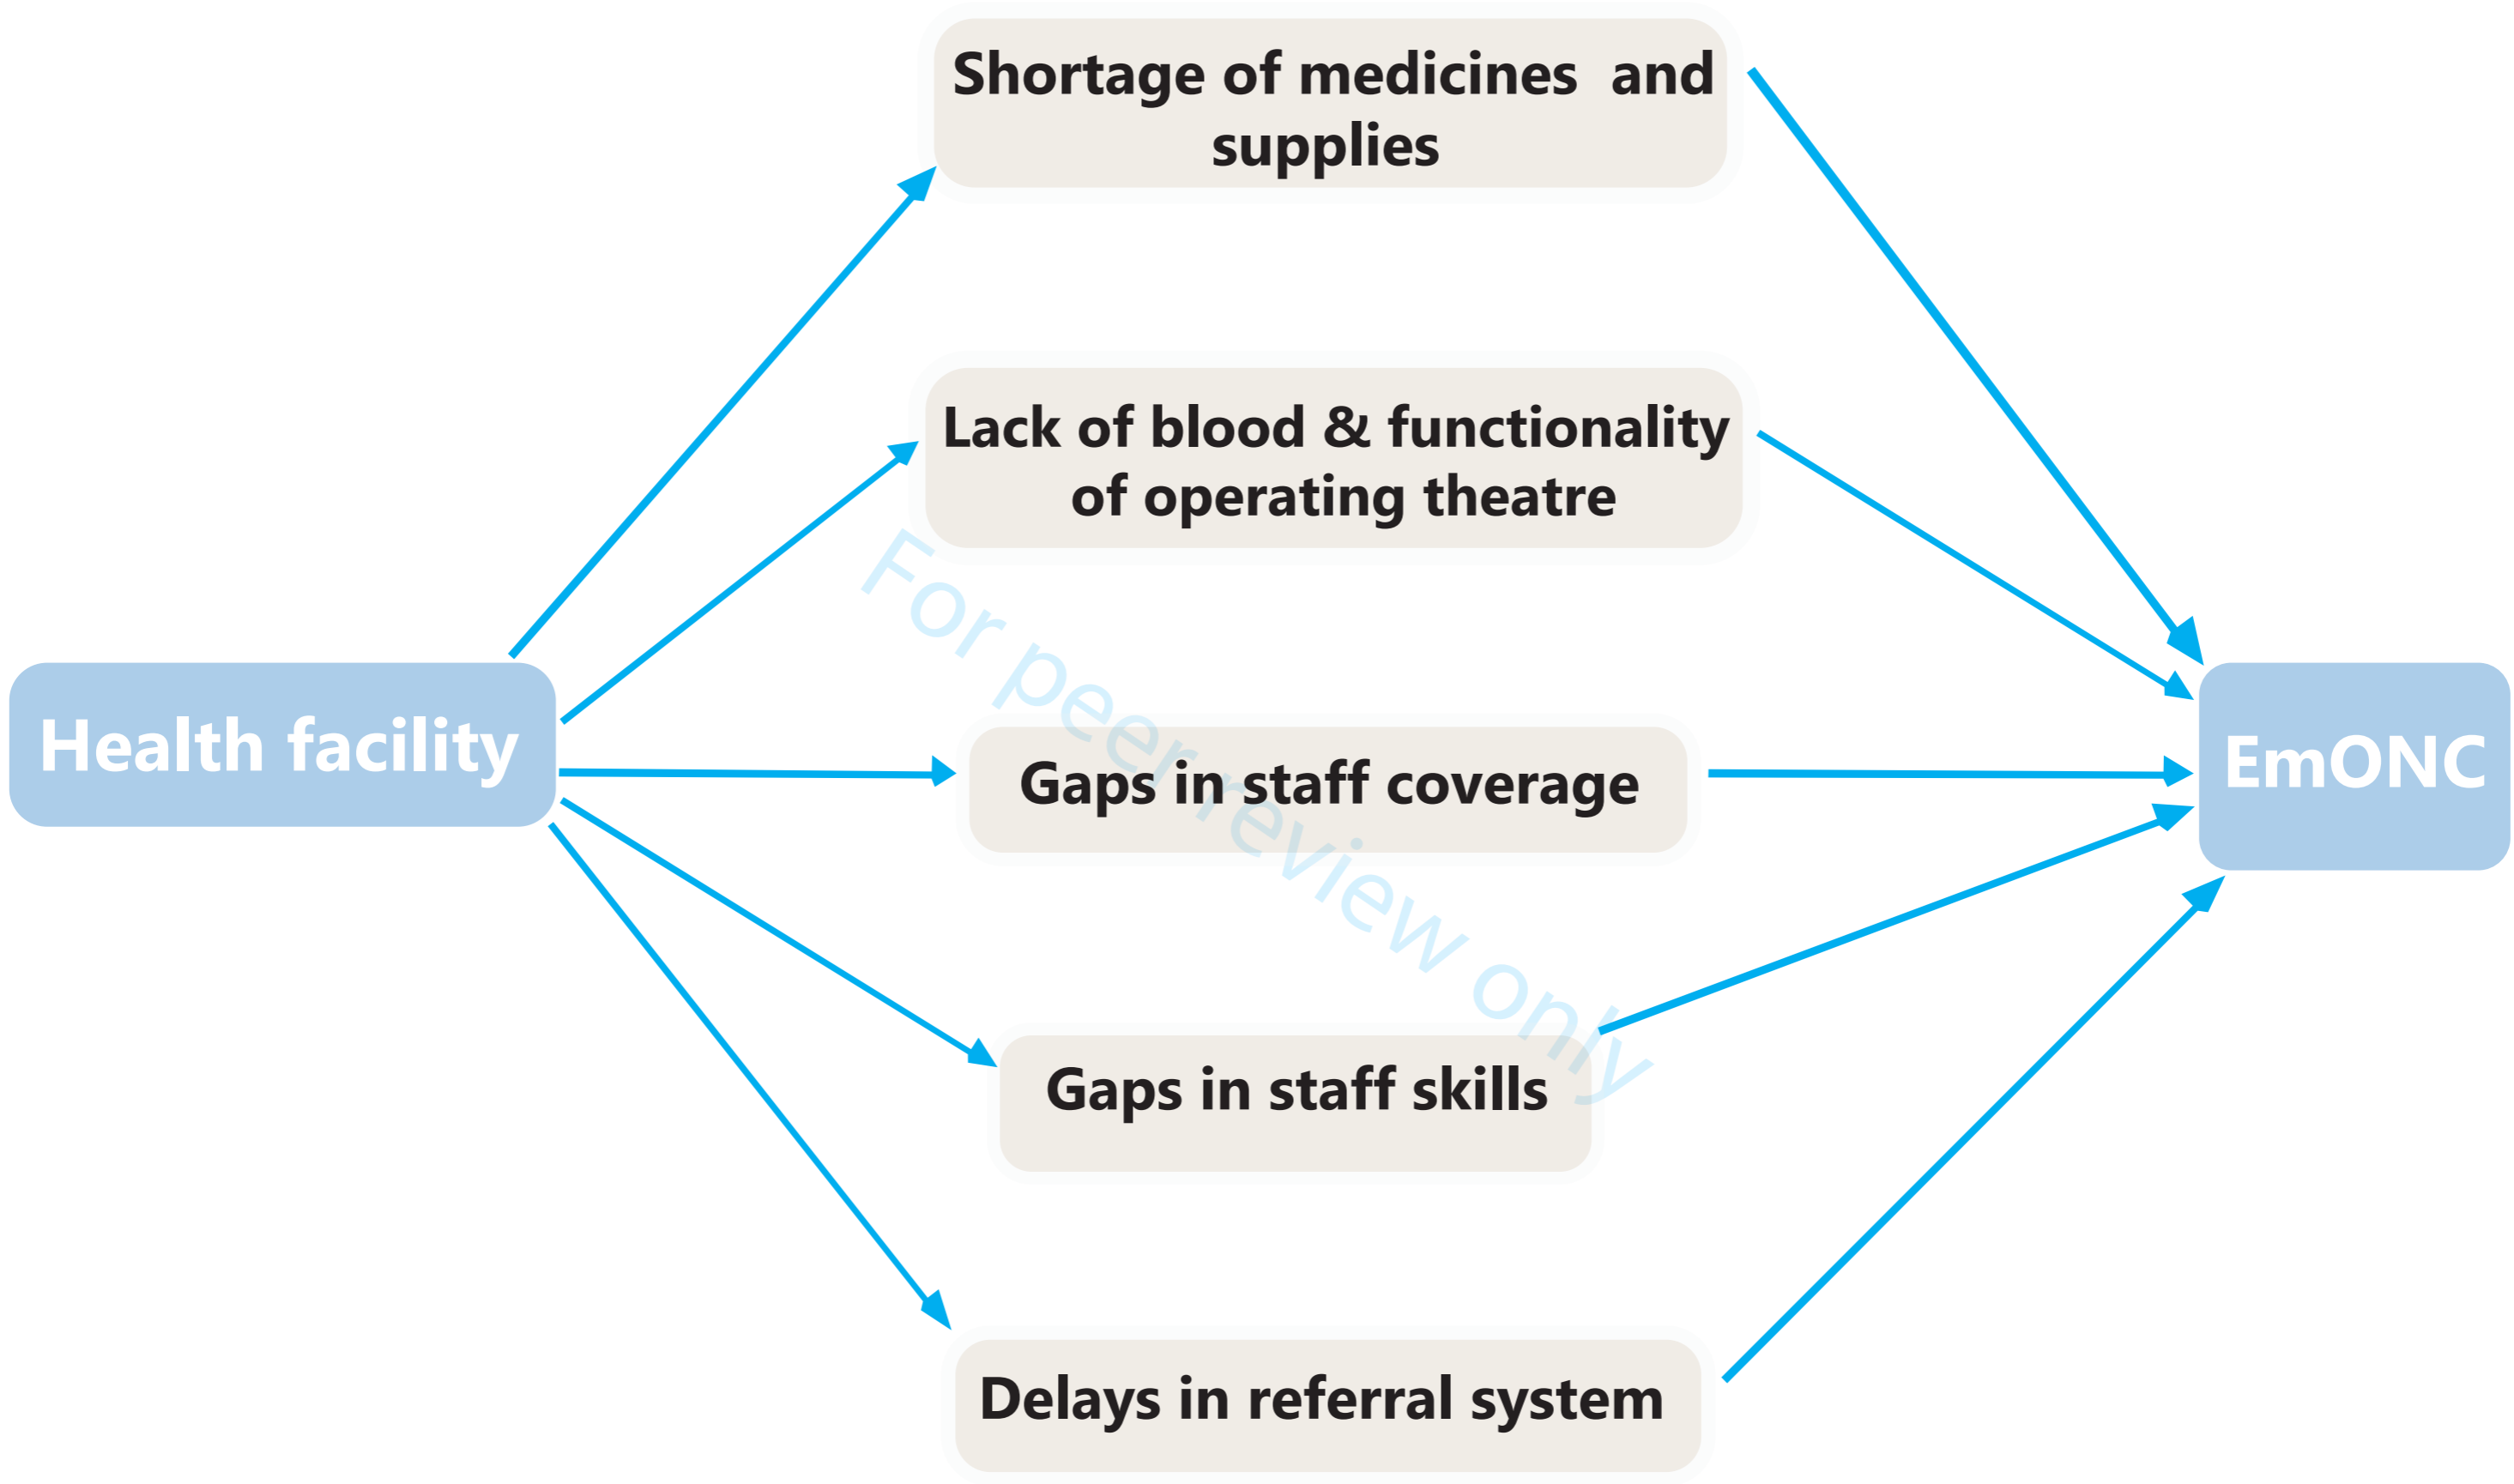

**Delays at the facility**

1  
2  
3  
4  
5  
6  
7  
8  
9  
10  
11  
12  
13  
14  
15  
16  
17  
18  
19  
20  
21  
22  
23  
24  
25  
26  
27  
28  
29  
30  
31  
32  
33  
34  
35  
36  
37  
38  
39  
40  
41  
42  
43  
44  
45  
46  
47  
48  
49  
50  
51  
52  
53  
54  
55  
56  
57  
58  
59  
60

### Woman's home

### Health centre II

### Health centre IV

### Lacor Hospital

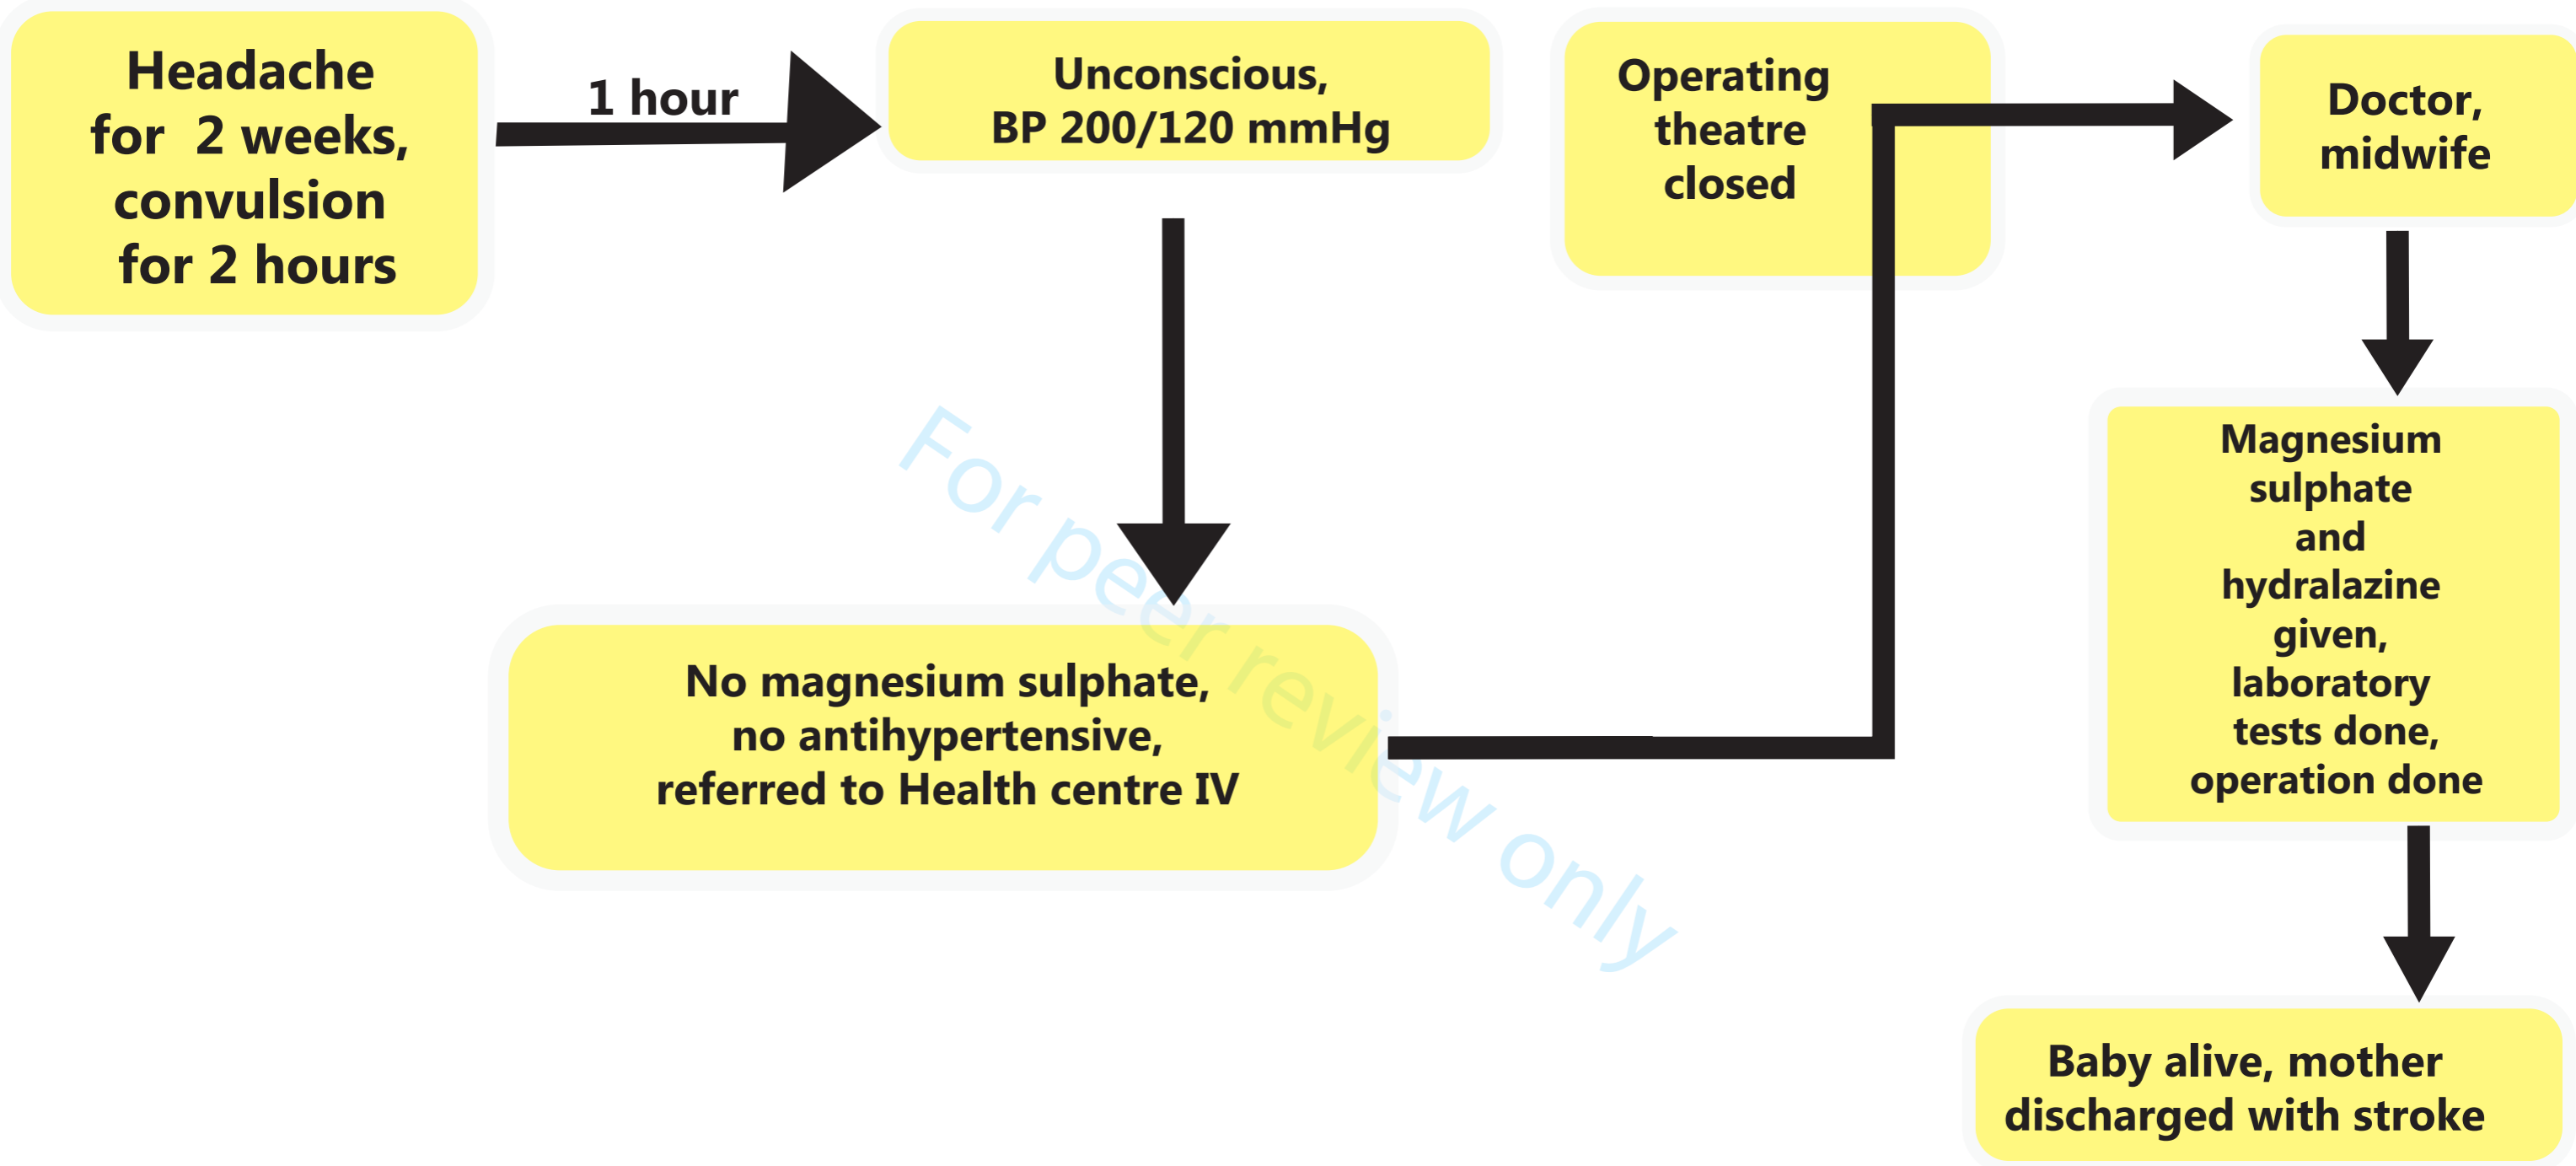



## Woman's home

## Regional Referral Hospital

## Lacor Hospital

**Labour for 1 day,  
bleeding**

**30 minutes**

**Doctor, midwife  
available**

**Delivered still birth,  
developed PPH**

**6 hours**

**In shock, no blood  
available, verbal  
referral given.**

**45 minutes**

**Doctor  
assessed**

**Shock and  
severe anemia**

**No blood,  
mother died  
within 10 minutes**

1  
2  
3  
4  
5  
6  
7  
8  
9  
10  
11  
12  
13  
14  
15  
16  
17  
18  
19  
20  
21  
22  
23  
24  
25  
26  
27  
28  
29  
30  
31  
32  
33  
34  
35  
36  
37  
38  
39  
40  
41  
42  
43  
44  
45  
46  
47  
48  
49  
50  
51  
52  
53  
54  
55  
56  
57  
58  
59  
60

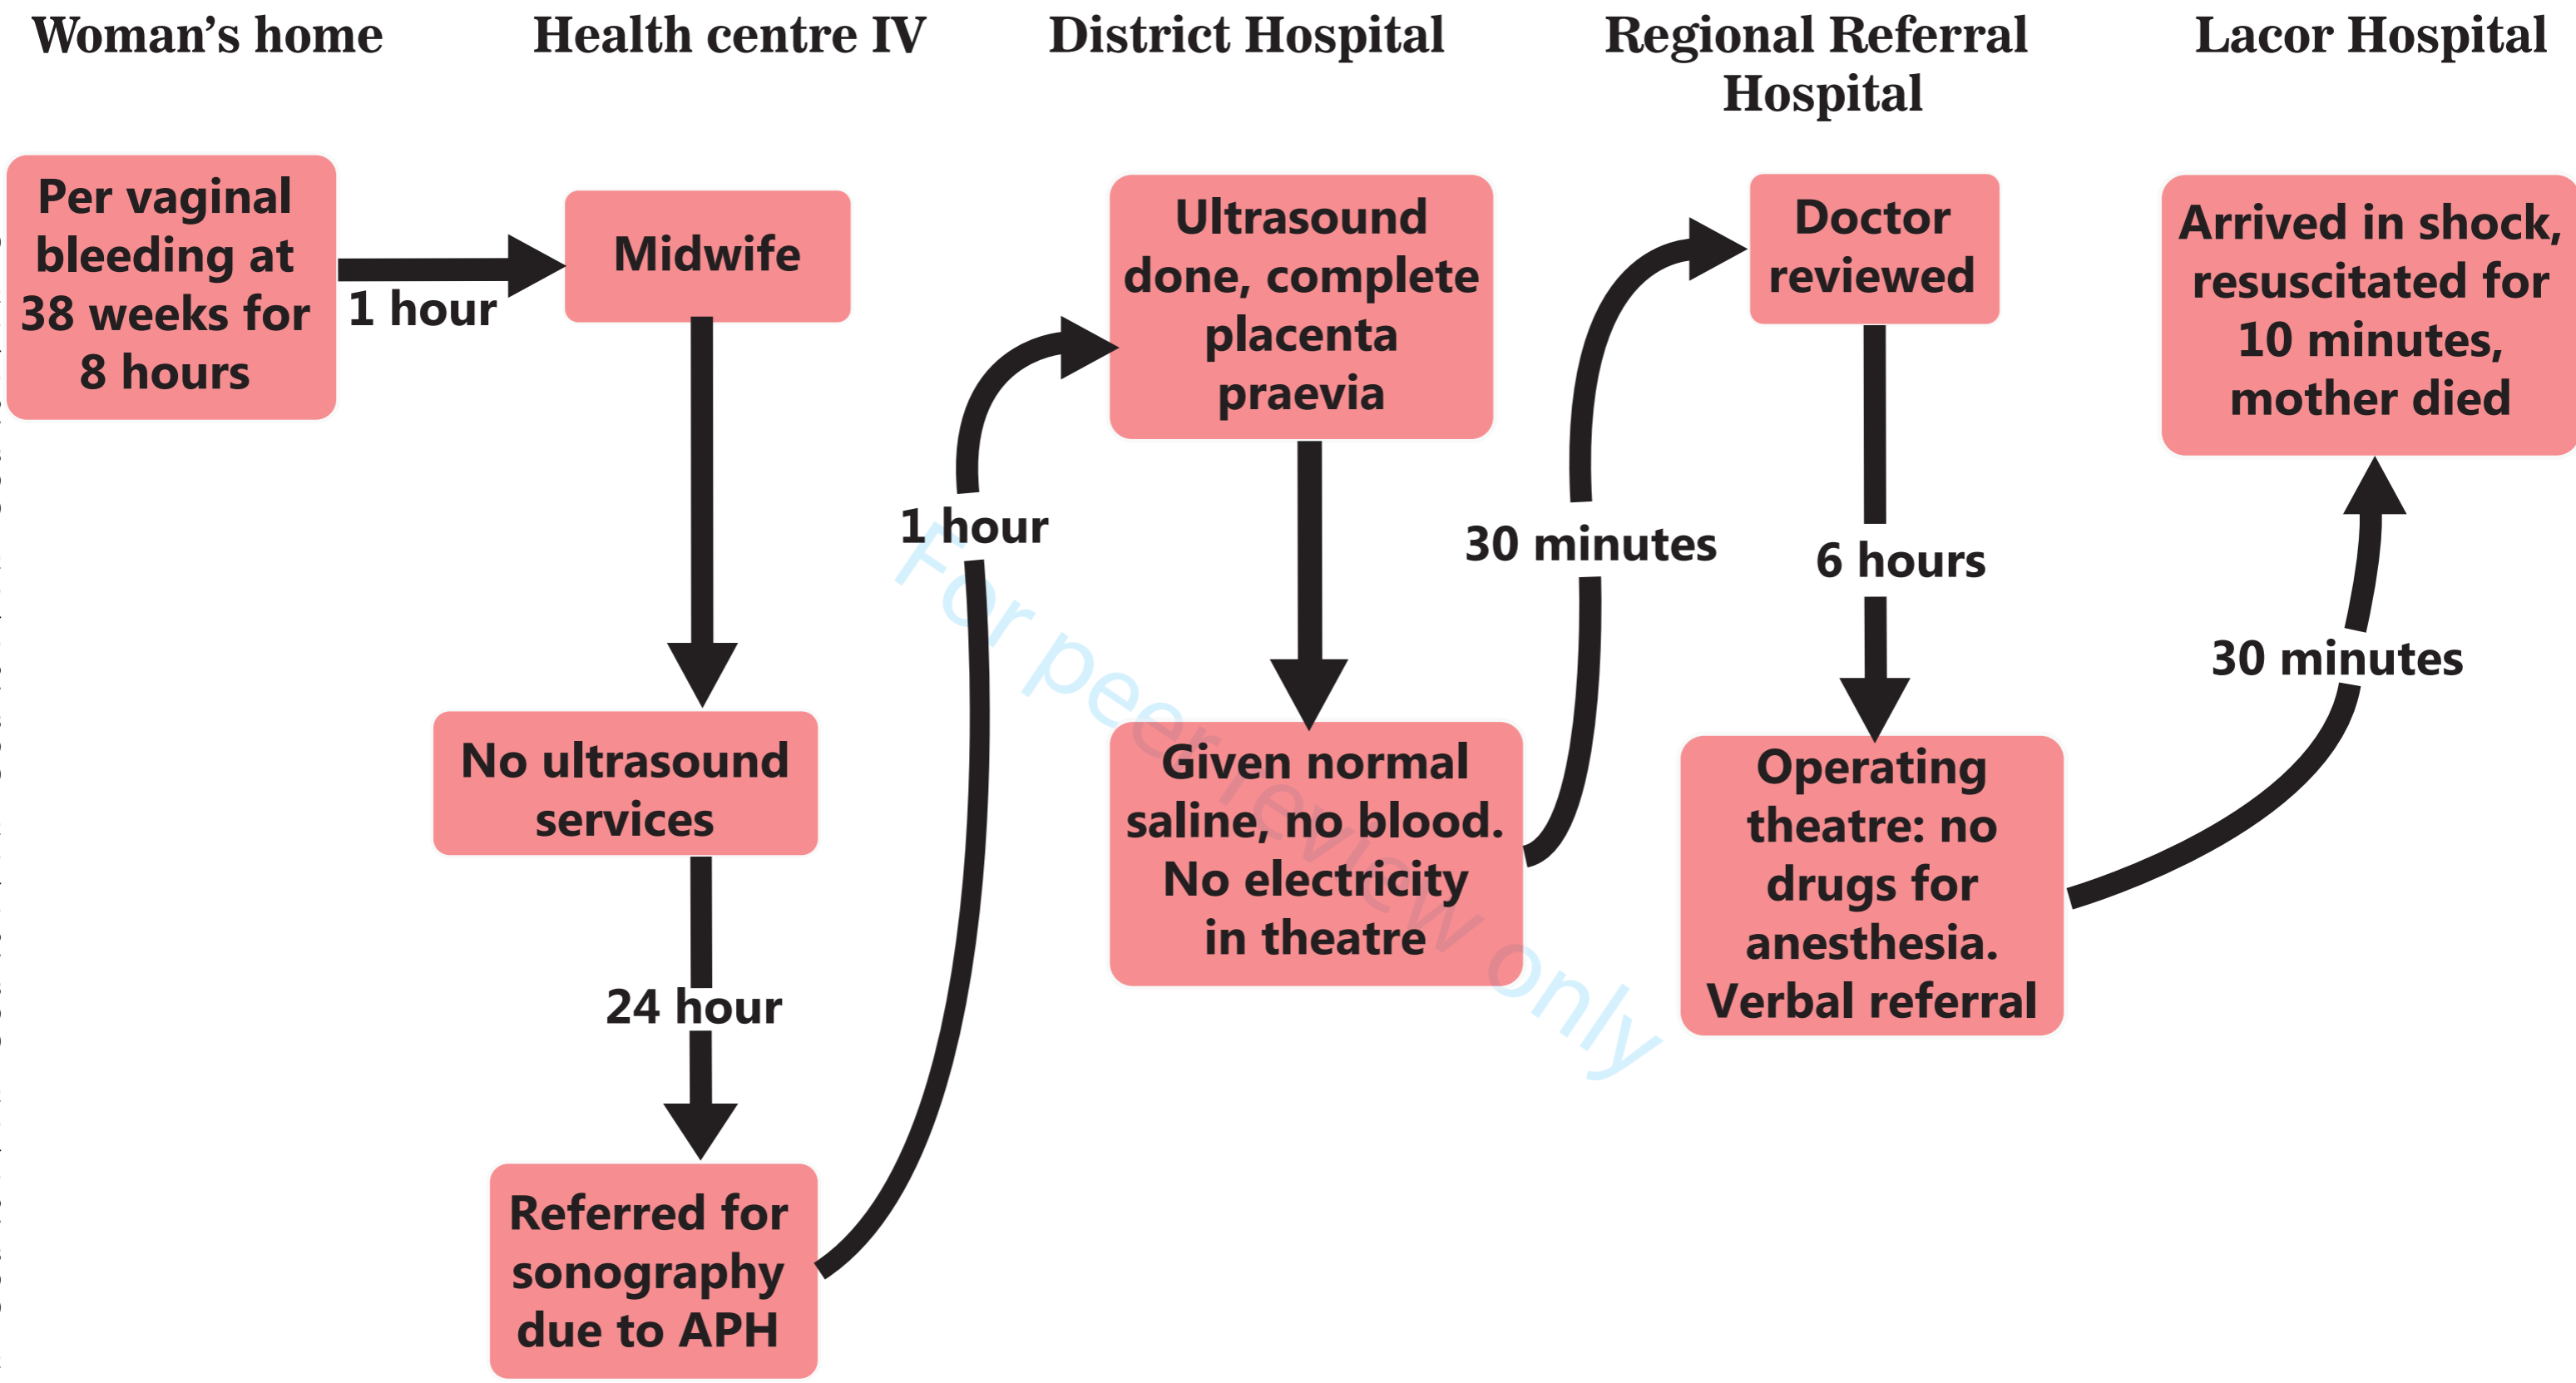

# Woman's home

# Health centre III

# Health centre IV

# Lacor Hospital

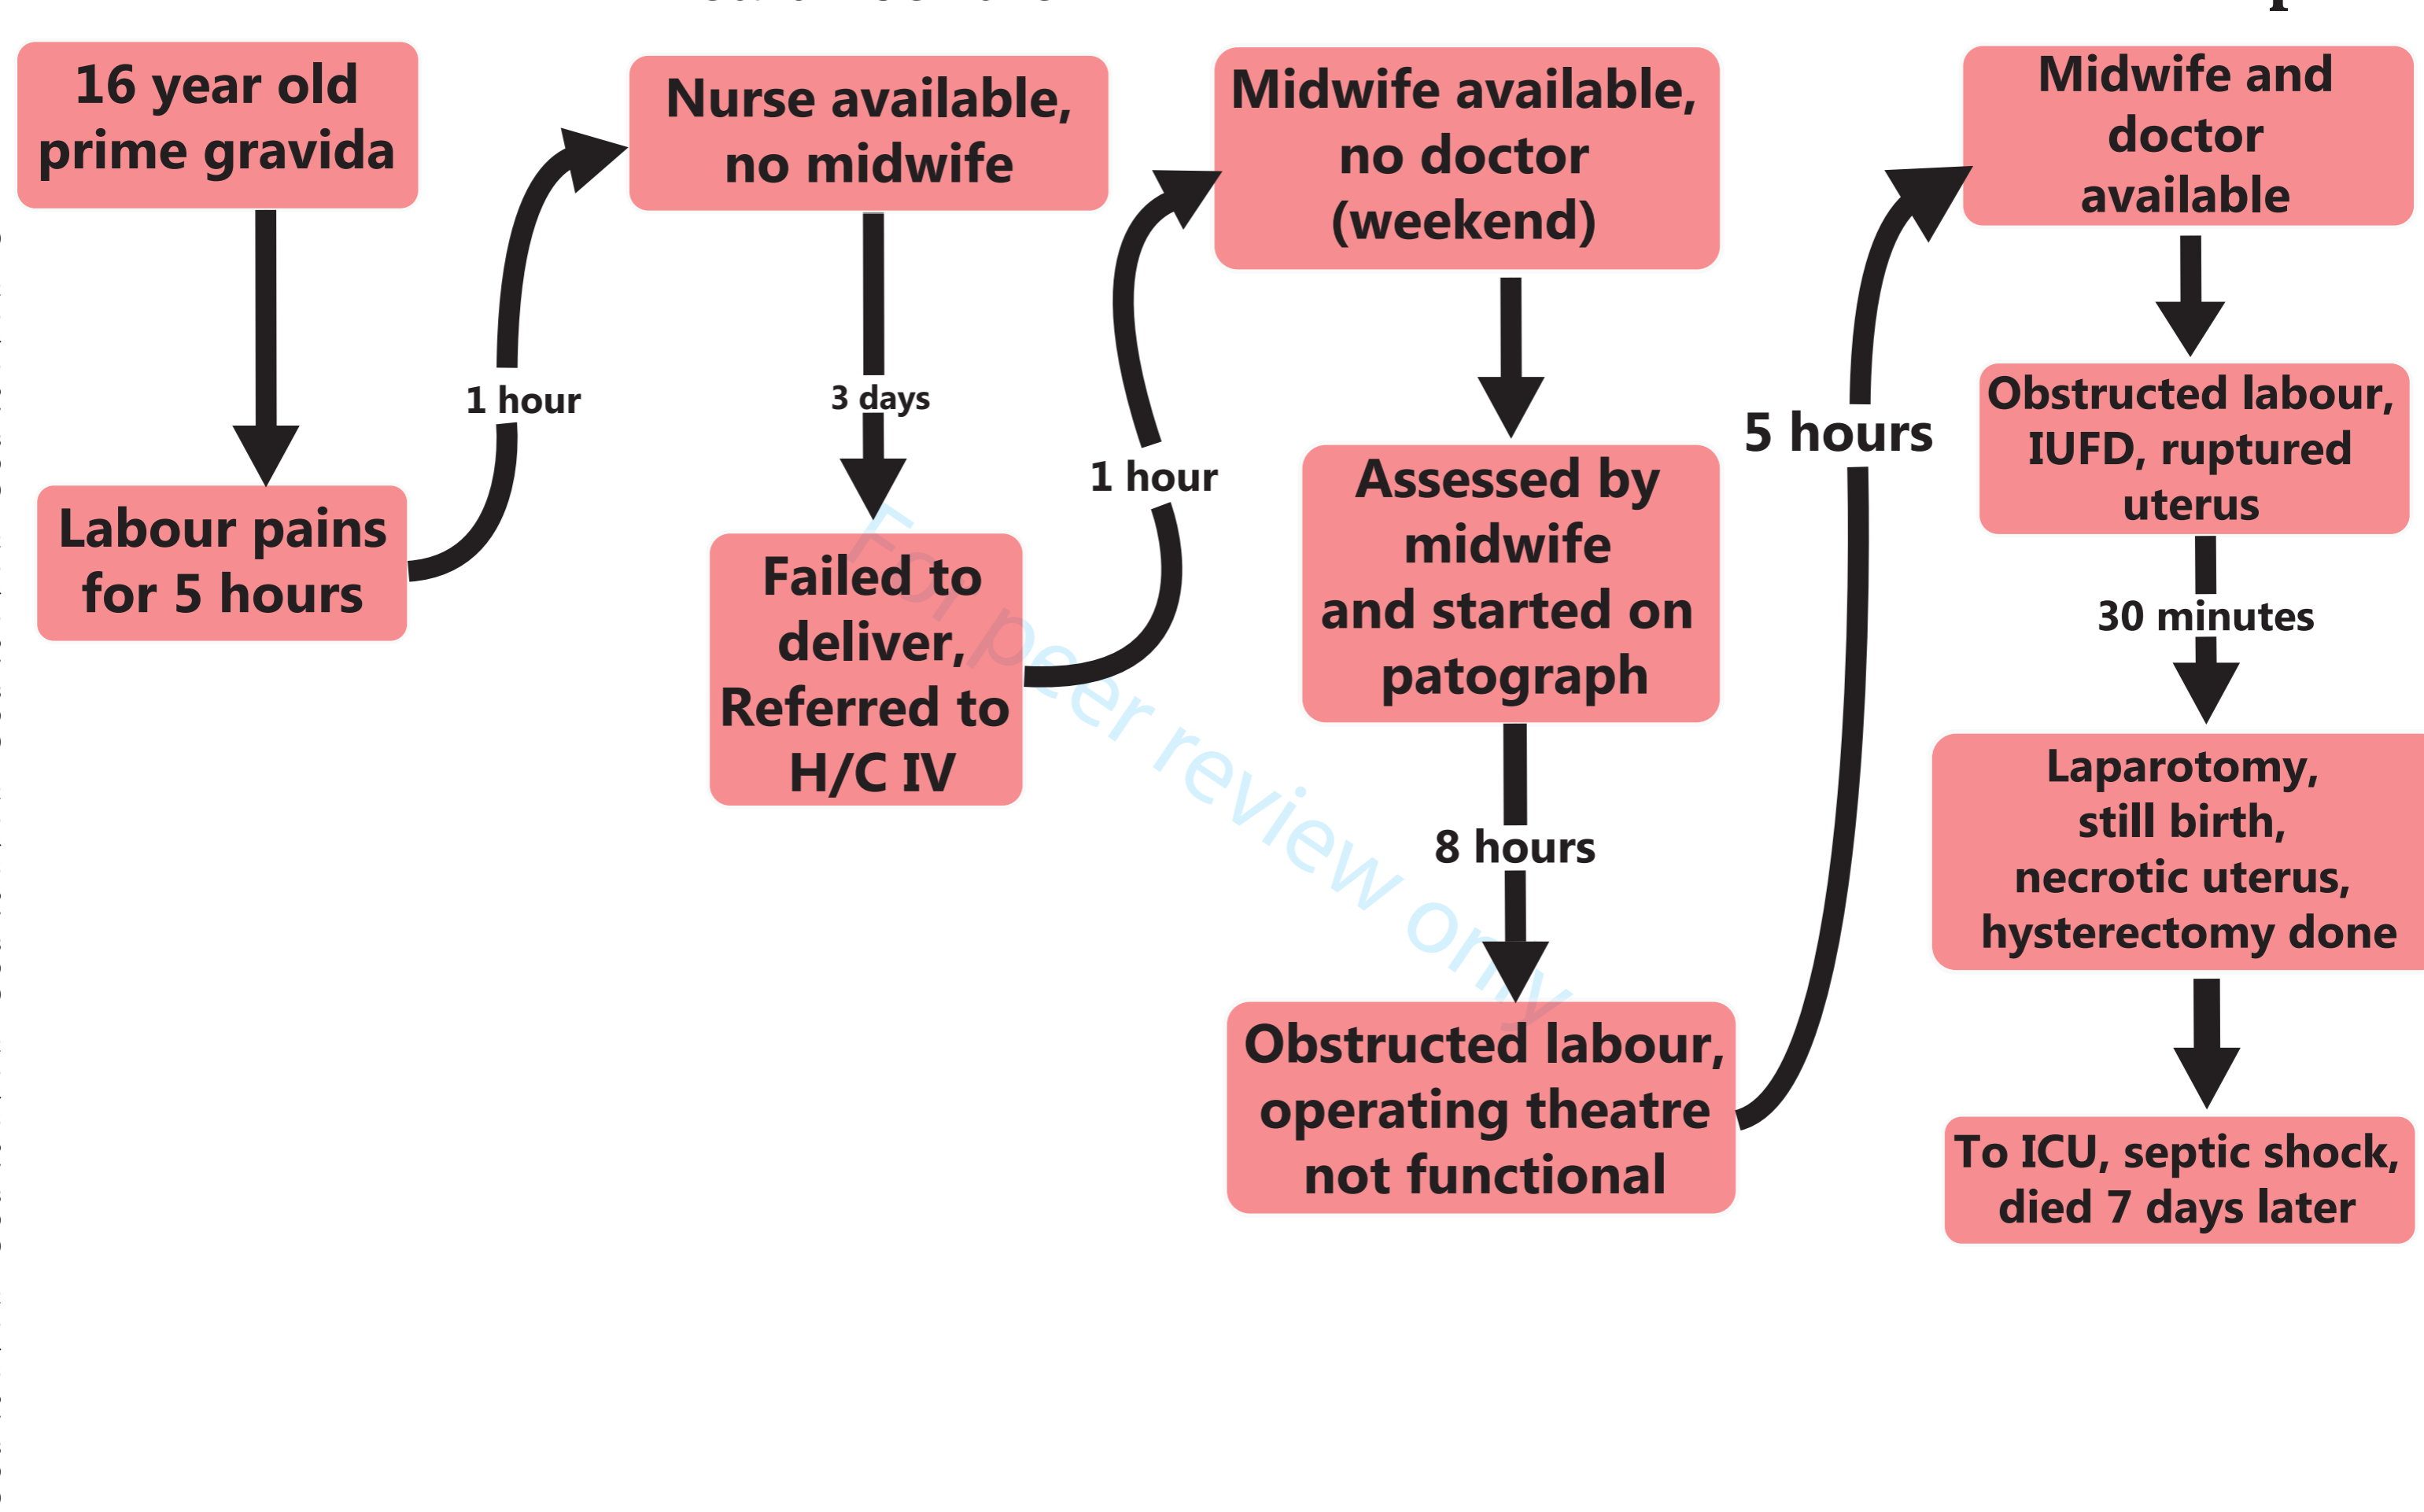

# Woman's home

# TBA's house

# District Hospital

# Lacor Hospital

Labour pain for 3 hours



TBA

2 days

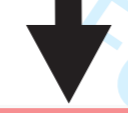

Failed to deliver

1 hour

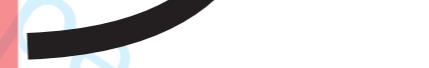

Nurse



No doctor



Midwife



Obstructed labour

2 hours

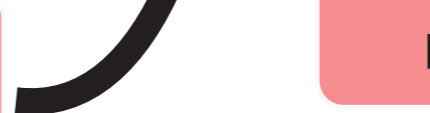

Midwife Doctor



Operating theatre, ruptured uterus



ICU, septic shock, mother died

# Garden

# Health centre III

# Pastor's Home

# Lacor Hospital

**Woman,  
36 weeks  
pregnant,  
sudden  
collapse**

**30 min**

**Convulsions  
2 times.  
Maternity  
closed**

**Raw eggs,  
spoon inserted  
in mouth by  
husband**

**30 min**

**6 hours,  
convulsions  
4 times**

**Unconscious, BP  
200/120 mmHg**

**Magnesium  
sulphate and  
hydralazine given**

**Cardiac arrest,  
mother died.**

*For peer review only*

1  
2  
3  
4  
5  
6  
7  
8  
9  
10  
11  
12  
13  
14  
15  
16  
17  
18  
19  
20  
21  
22  
23  
24  
25  
26  
27  
28  
29  
30  
31  
32  
33  
34  
35  
36  
37  
38  
39  
40  
41  
42  
43  
44  
45  
46  
47  
48  
49  
50  
51  
52  
53  
54  
55  
56  
57  
58  
59  
60

# Woman's home

# Health centre III

# Lacor Hospital

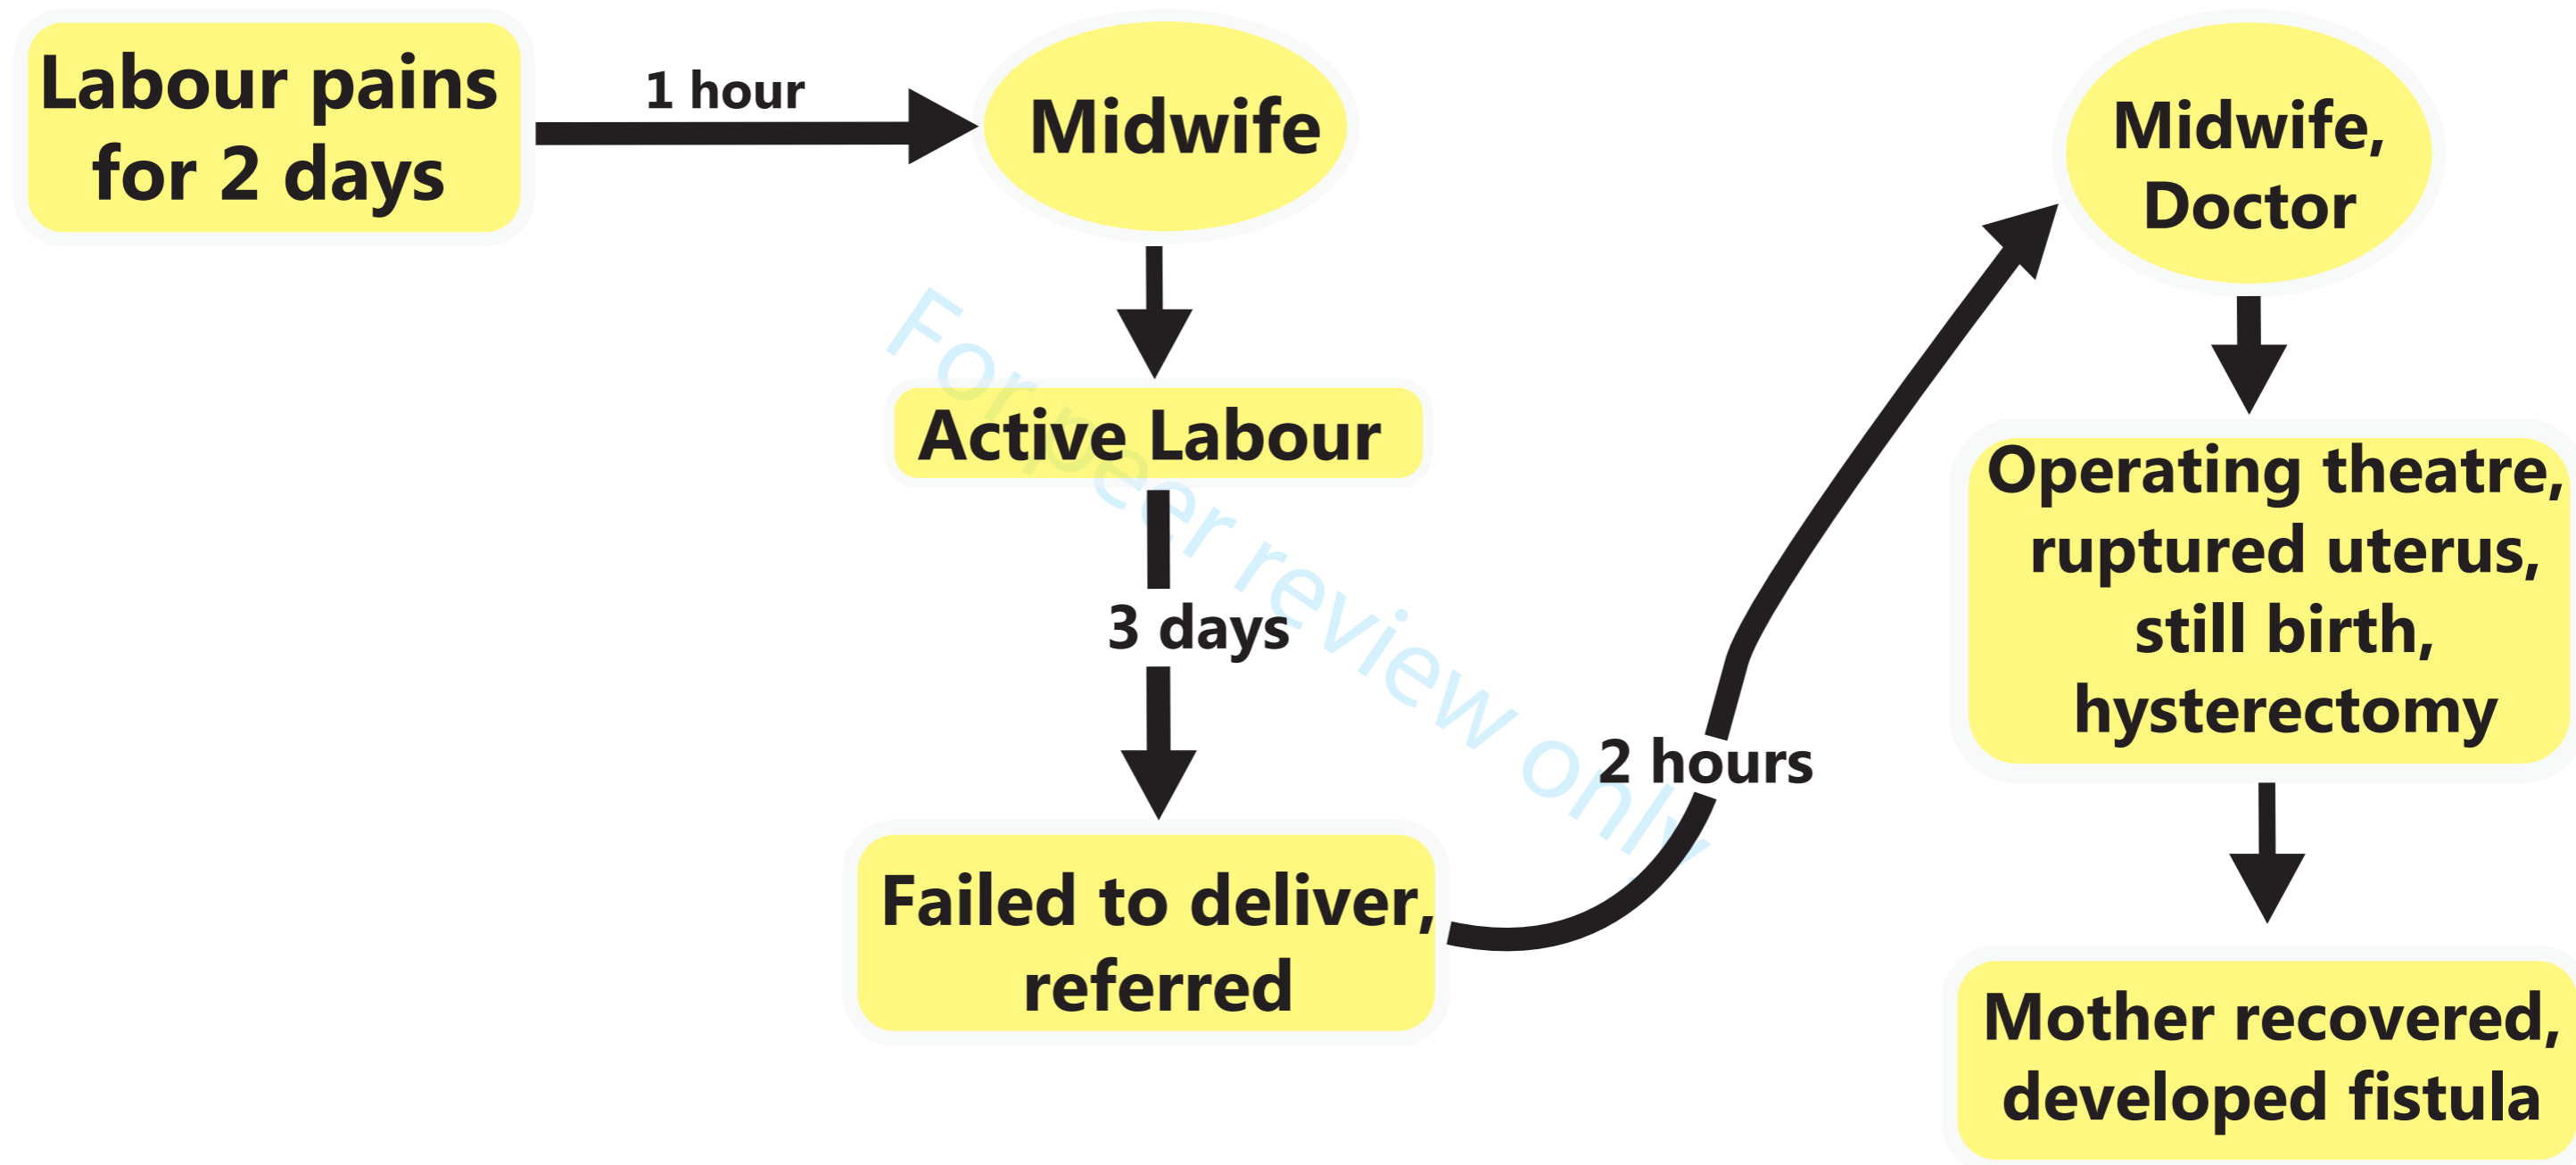

### Woman's home

### At Health centre IV

### District Hospital

### Private Clinic

### Lacor Hospital

**Induced Abortion**

2 weeks

**Severe abdominal pain**

2 hours

**Midwife, Doctor**

**IV fluids, Antibiotics**

6 days

**Deterioration of the condition**

4 hours

**Midwife, No Doctor**

**No power, referred for ultrasound**

**Family asked for referral**

**Doctor called on phone, granted referral**

**Radiographer**

**Ultrasound done**

4 hours

**Midwife, Doctor**

**Blood transfusion**

**Operating theatre, hysterectomy**

**ICU, near-miss, Discharged**

For peer review only

1  
2  
3  
4  
5  
6  
7  
8  
9  
10  
11  
12  
13  
14  
15  
16  
17  
18  
19  
20  
21  
22  
23  
24  
25  
26  
27  
28  
29  
30  
31  
32  
33  
34  
35  
36  
37  
38  
39  
40  
41  
42  
43  
44  
45  
46  
47  
48  
49  
50  
51  
52  
53  
54  
55  
56  
57  
58  
59  
60

## Why women die after reaching the hospital: a qualitative critical incident analysis of the "third delay" in post-conflict northern Uganda.

### Guiding questions for the CIT and KI interviews

#### Introduction

1. The interviewer introduces self and thanks the participant(s) for sparing time for the interview
2. Introduce the study – brief background and objectives of the study. Describe clearly the research and the role of the participants, the commitment involved, any foreseeable risks, and expected benefits.
3. Get verbal consent- ask whether the participant has understood the study and willing to give consent. "Do you need further clarification? If no, do you accept to participate in this study?" If the participant answers "yes", then proceed as below
4. Getting to know the interviewee – name and relationship with the deceased (if applicable).
5. Personal and demographic data
6. Background information about the family

#### Body

1. The four guiding questions:
  - i. when did (name of the woman or you) start having labour pains or feeling unwell?
  - ii. where did she (or you) go to?
  - iii. how did she (or you) reach there and how long did she (or you) take?
  - iv. what happened on arrival at the facility?
2. Allow the interviewee(s) to speak about the event as much as possible.
3. Return to the beginning of the story and ask follow-up and probing questions in order to make clarifications.

#### Specific questions

Depending on the specific event and interviewee, ask the following questions:

1. Past obstetric history



2. Previous similar experiences
3. Culture, beliefs and choice of health-seeking behaviours

**Additional questions for facility in-charges:**

1. What is your evaluation of the quality of emergency obstetrics and new born care (EmONC) services in this facility?
2. What is your evaluation of the ability of the healthcare professionals in this facility to manage obstetric emergencies?
3. What is your evaluation of the obstetric referral system?
4. To what extent are the people in this sub-region satisfied with the maternal healthcare system?

**End**

1. Any future resolutions and recommendations- what do you think can be done to reduce or prevent delay within the health facilities and, generally, improve maternal and new born outcomes in this facility and the region at large?
2. Revisit the answers of some questions to make clarifications and member checking where necessary.
3. Thank Interviewees for their full participation and help.

## Standards for Reporting Qualitative Research (SRQR)

| No  | Topic                                        | Item                                                                                                                                                                                                                                                                                                                                             | Page & Line # |
|-----|----------------------------------------------|--------------------------------------------------------------------------------------------------------------------------------------------------------------------------------------------------------------------------------------------------------------------------------------------------------------------------------------------------|---------------|
|     | <b>Title and abstract</b>                    |                                                                                                                                                                                                                                                                                                                                                  |               |
| S1  | Title                                        | Concise description of the nature and topic of the study Identifying the study as qualitative or indicating the approach (e.g., ethnography, grounded theory) or data collection methods (e.g., interview, focus group) is recommended                                                                                                           |               |
| S2  | Abstract                                     | Summary of key elements of the study using the abstract format of the intended publication; typically includes background, purpose, methods, results, and conclusions                                                                                                                                                                            |               |
|     | <b>Introduction</b>                          |                                                                                                                                                                                                                                                                                                                                                  |               |
| S3  | Problem formulation                          | Description and significance of the problem/phenomenon studied; review of relevant theory and empirical work; problem statement                                                                                                                                                                                                                  |               |
| S4  | Purpose or research question                 | Purpose of the study and specific objectives or questions                                                                                                                                                                                                                                                                                        |               |
|     | <b>Methods</b>                               |                                                                                                                                                                                                                                                                                                                                                  |               |
| S5  | Qualitative approach and research paradigm   | Qualitative approach (e.g., ethnography, grounded theory, case study, phenomenology, narrative research) and guiding theory if appropriate; identifying the research paradigm (e.g., postpositivist, constructivist/interpretivist) is also recommended; rationale <sup>b</sup>                                                                  |               |
| S6  | Researcher characteristics and reflexivity   | Researchers' characteristics that may influence the research, including personal attributes, qualifications/experience, relationship with participants, assumptions, and/or presuppositions; potential or actual interaction between researchers' characteristics and the research questions, approach, methods, results, and/or transferability |               |
| S7  | Context                                      | Setting/site and salient contextual factors; rationale <sup>b</sup>                                                                                                                                                                                                                                                                              |               |
| S8  | Sampling strategy                            | How and why research participants, documents, or events were selected; criteria for deciding when no further sampling was necessary (e.g., sampling saturation); rationale <sup>b</sup>                                                                                                                                                          |               |
| S9  | Ethical issues pertaining to human subjects  | Documentation of approval by an appropriate ethics review board and participant consent, or explanation for lack thereof; other confidentiality and data security issues                                                                                                                                                                         |               |
| S10 | Data collection methods                      | Types of data collected; details of data collection procedures including (as appropriate) start and stop dates of data collection and analysis, iterative process, triangulation of sources/methods, and modification of procedures in response to evolving study findings; rationale <sup>b</sup>                                               |               |
| S11 | Data collection instruments and technologies | Description of instruments (e.g., interview guides, questionnaires) and devices (e.g., audio recorders) used for data collection; if/how the instrument(s) changed over the course of the study                                                                                                                                                  |               |
| S12 | Units of study                               | Number and relevant characteristics of participants, documents, or events included in the study; level of participation (could be reported in results)                                                                                                                                                                                           |               |
| S13 | Data processing                              | Methods for processing data prior to and during analysis, including transcription, data entry, data management and security, verification of data integrity, data coding, and anonymization/deidentification of excerpts                                                                                                                         |               |
| S14 | Data analysis                                | Process by which inferences, themes, etc., were identified and developed, including the researchers involved in data analysis; usually references a specific paradigm or approach; rationale <sup>b</sup>                                                                                                                                        |               |
| S15 | Techniques to enhance trustworthiness        | Techniques to enhance trustworthiness and credibility of data analysis (e.g., member checking, audit trail, triangulation); rationale <sup>b</sup>                                                                                                                                                                                               |               |
|     | <b>Results/findings</b>                      |                                                                                                                                                                                                                                                                                                                                                  |               |
| S16 | Synthesis and interpretation                 | Main findings (e.g., interpretations, inferences, and themes); might include development of a theory or model, or integration with prior research or theory                                                                                                                                                                                      |               |
| S17 | Links to empirical data                      | Evidence (e.g., quotes, field notes, text excerpts, photographs) to substantiate analytic findings                                                                                                                                                                                                                                               |               |

|    |                   |                                                                                              |                                                                                                                                                                                                                                                                                                        |
|----|-------------------|----------------------------------------------------------------------------------------------|--------------------------------------------------------------------------------------------------------------------------------------------------------------------------------------------------------------------------------------------------------------------------------------------------------|
|    | <b>Discussion</b> |                                                                                              |                                                                                                                                                                                                                                                                                                        |
| 1  |                   |                                                                                              |                                                                                                                                                                                                                                                                                                        |
| 2  | S18               | Integration with prior work, implications, transferability, and contribution(s) to the field | Short summary of main findings; explanation of how findings and conclusions connect to, support, elaborate on, or challenge conclusions of earlier scholarship; discussion of scope of application/ generalizability; identification of unique contribution(s) to scholarship in a discipline or field |
| 3  |                   |                                                                                              |                                                                                                                                                                                                                                                                                                        |
| 4  |                   |                                                                                              |                                                                                                                                                                                                                                                                                                        |
| 5  |                   |                                                                                              |                                                                                                                                                                                                                                                                                                        |
| 6  | S19               | Limitations                                                                                  | Trustworthiness and limitations of findings                                                                                                                                                                                                                                                            |
| 7  |                   | <b>Other</b>                                                                                 |                                                                                                                                                                                                                                                                                                        |
| 8  | S20               | Conflicts of interest                                                                        | Potential sources of influence or perceived influence on study conduct and conclusions; how these were managed                                                                                                                                                                                         |
| 9  |                   |                                                                                              |                                                                                                                                                                                                                                                                                                        |
| 10 | S21               | Funding                                                                                      | Sources of funding and other support; role of funders in data collection, interpretation, and reporting                                                                                                                                                                                                |
| 11 |                   |                                                                                              |                                                                                                                                                                                                                                                                                                        |
| 12 |                   |                                                                                              |                                                                                                                                                                                                                                                                                                        |

O'Brien BC, Harris IB, Beckman TJ, Reed DA, Cook DA. Standards for reporting qualitative research: a synthesis of recommendations. *Acad Med* 2014 Sep;89(9):1245-51.

<sup>a</sup>The authors created the SRQR by searching the literature to identify guidelines, reporting standards, and critical appraisal criteria for qualitative research; reviewing the reference lists of retrieved sources; and contacting experts to gain feedback. The SRQR aims to improve the transparency of all aspects of qualitative research by providing clear standards for reporting qualitative research. <sup>b</sup>The rationale should briefly discuss the justification for choosing that theory, approach, method, or technique rather than other options available, the assumptions and limitations implicit in those choices, and how those choices influence study conclusions and transferability. As appropriate, the rationale for several items might be discussed together.
